# Supplementary material
Source: PubMed Central journal article supplement (PMC3411923)
Supplement: NIHMS386414-supplement-1.pdf [file NIHMS386414-supplement-1.pdf]

**Supplemental Table 1. Complete list of peptides synthesized.**

| Organism              | Taxonomy ID | Source protein | SwissProt ID | GI number | Position | Sequence         | Len. | Peptide ID |
|-----------------------|-------------|----------------|--------------|-----------|----------|------------------|------|------------|
| Alder                 | 3517        | Aln g 1        | P38948       | 730050    | 1        | MGVFNVEAETPSVIP  | 15   | 3324.0008  |
| Alder                 | 3517        | Aln g 1        | P38948       | 730050    | 11       | PSVIPAAARLFKAFIL | 15   | 3324.0004  |
| Alder                 | 3517        | Aln g 1        | P38948       | 730050    | 16       | AARLFKAFILDGDKL  | 15   | 3324.0003  |
| Alder                 | 3517        | Aln g 1        | P38948       | 730050    | 76       | DRVNFKYSFVSIEGG  | 15   | 3324.0002  |
| Alder                 | 3517        | Aln g 1        | P38948       | 730050    | 111      | GGSLKISNKFHTKG   | 15   | 3324.0007  |
| Alder                 | 3517        | Aln g 1        | P38948       | 730050    | 136      | IEKEKAVGLLKAVES  | 15   | 3324.0006  |
| Alder                 | 3517        | Aln g 1        | P38948       | 730050    | 141      | AVGLLKAVESYLLAH  | 15   | 3324.0001  |
| Alder                 | 3517        | Aln g 1        | P38948       | 730050    | 146      | KAVESYLLAHSDAYN  | 15   | 3324.0005  |
| Alder                 | 3517        | Aln g 4        | O81701       | 14423845  | 56       | TDGDGFISFQEFNTF  | 15   | 3324.0010  |
| Alder                 | 3517        | Aln g 4        | O81701       | 14423845  | 61       | FISFQEFNTFARANR  | 15   | 3324.0009  |
| Alder                 | 3517        | Aln g 4        | O81701       | 14423845  | 71       | ARANRGLVKDVAKIF  | 15   | 3337.0001  |
| Alternaria rot fungus | 5599        | Alt a 1        | P79085       | 14423645  | 1        | MQFTTIASLFAAAGL  | 15   | 3324.0012  |
| Alternaria rot fungus | 5599        | Alt a 1        | P79085       | 14423645  | 6        | IASLFAAAGLAAAAP  | 15   | 3324.0015  |
| Alternaria rot fungus | 5599        | Alt a 1        | P79085       | 14423645  | 11       | AAAGLAAAAPLESRQ  | 15   | 3324.0017  |
| Alternaria rot fungus | 5599        | Alt a 1        | P79085       | 14423645  | 111      | KVSDDTIVVATATLP  | 15   | 3324.0013  |
| Alternaria rot fungus | 5599        | Alt a 1        | P79085       | 14423645  | 116      | ITYVATATLPNYCRA  | 15   | 3324.0014  |
| Alternaria rot fungus | 5599        | Alt a 1        | P79085       | 14423645  | 141      | QGVADAYITLVTLPK  | 15   | 3324.0011  |
| Alternaria rot fungus | 5599        | Alt a 1        | P79085       | 14423645  | 143      | VADAYITLVTLPKSS  | 15   | 3324.0016  |
| Alternaria rot fungus | 5599        | Alt a 10       | P42041       | 76666767  | 16       | QPTGLFINNEFVKAV  | 15   | 3324.0023  |
| Alternaria rot fungus | 5599        | Alt a 10       | P42041       | 76666767  | 56       | DVDIAVAARKAFNG   | 15   | 3324.0032  |
| Alternaria rot fungus | 5599        | Alt a 10       | P42041       | 76666767  | 81       | GKLLNKLADLFEKNA  | 15   | 3324.0022  |
| Alternaria rot fungus | 5599        | Alt a 10       | P42041       | 76666767  | 141      | DTAPDSFNIRKEPI   | 15   | 3324.0021  |
| Alternaria rot fungus | 5599        | Alt a 10       | P42041       | 76666767  | 146      | SFNIRKEPIGVCQG   | 15   | 3324.0033  |
| Alternaria rot fungus | 5599        | Alt a 10       | P42041       | 76666767  | 161      | IIPWNFPILMWSWKI  | 15   | 3324.0019  |
| Alternaria rot fungus | 5599        | Alt a 10       | P42041       | 76666767  | 301      | GSRIYVQEEIYDKFI  | 15   | 3324.0025  |
| Alternaria rot fungus | 5599        | Alt a 10       | P42041       | 76666767  | 306      | VQEEIYDKFIQRFKE  | 15   | 3324.0024  |
| Alternaria rot fungus | 5599        | Alt a 10       | P42041       | 76666767  | 311      | YDKFIQRFKERAQAN  | 15   | 3324.0028  |
| Alternaria rot fungus | 5599        | Alt a 10       | P42041       | 76666767  | 341      | VSQLQFDRIMGYIEE  | 15   | 3324.0034  |
| Alternaria rot fungus | 5599        | Alt a 10       | P42041       | 76666767  | 371      | GDKGYFIEPTIFSNV  | 15   | 3324.0018  |
| Alternaria rot fungus | 5599        | Alt a 10       | P42041       | 76666767  | 421      | YGLAAAVHTSNLTTA  | 15   | 3324.0031  |
| Alternaria rot fungus | 5599        | Alt a 10       | P42041       | 76666767  | 431      | NLTTAIEVANALRAG  | 15   | 3324.0027  |
| Alternaria rot fungus | 5599        | Alt a 10       | P42041       | 76666767  | 436      | IEVANALRAGTVWVN  | 15   | 3324.0030  |
| Alternaria rot fungus | 5599        | Alt a 10       | P42041       | 76666767  | 446      | TVWVNSYNTLHWQLP  | 15   | 3324.0020  |
| Alternaria rot fungus | 5599        | Alt a 10       | P42041       | 76666767  | 476      | AALDNVIQTKTVSIR  | 15   | 3324.0026  |
| Alternaria rot fungus | 5599        | Alt a 10       | P42041       | 76666767  | 481      | YIQTKTYSIRLGDVL  | 15   | 3324.0029  |
| Alternaria rot fungus | 5599        | Alt a 12       | P49148       | 1350779   | 1        | MSTSELATSYAALIL  | 15   | 3324.0036  |
| Alternaria rot fungus | 5599        | Alt a 12       | P49148       | 1350779   | 6        | LATSYAALILADDGV  | 15   | 3324.0035  |
| Alternaria rot fungus | 5599        | Alt a 12       | P49148       | 1350779   | 26       | KLQSLIKAAKIEEVE  | 15   | 3324.0037  |
| Alternaria rot fungus | 5599        | Alt a 12       | P49148       | 1350779   | 41       | PIWTTLFAKALEGKD  | 15   | 3324.0039  |
| Alternaria rot fungus | 5599        | Alt a 12       | P49148       | 1350779   | 76       | LLLRWRAADAAPAAE  | 15   | 3324.0038  |
| Alternaria rot fungus | 5599        | Alt a 13       | Q6R4B4       | 41057621  | 6        | SELAVQKLVLFVAVKG | 15   | 3324.0041  |
| Alternaria rot fungus | 5599        | Alt a 13       | Q6R4B4       | 41057621  | 11       | QKLVLFVAVKGTATST | 15   | 3324.0044  |
| Alternaria rot fungus | 5599        | Alt a 13       | Q6R4B4       | 41057621  | 26       | HNTVRLPILLLDELGV | 15   | 3324.0049  |
| Alternaria rot fungus | 5599        | Alt a 13       | Q6R4B4       | 41057621  | 76       | DTLRAWESTSTLMYI  | 15   | 3324.0048  |
| Alternaria rot fungus | 5599        | Alt a 13       | Q6R4B4       | 41057621  | 111      | INNWLTLHTAALGPT  | 15   | 3324.0043  |
| Alternaria rot fungus | 5599        | Alt a 13       | Q6R4B4       | 41057621  | 126      | AKYWLYFYKLIHPEKL | 15   | 3324.0040  |
| Alternaria rot fungus | 5599        | Alt a 13       | Q6R4B4       | 41057621  | 141      | PKTIEKLRNSNITVQY | 15   | 3324.0051  |
| Alternaria rot fungus | 5599        | Alt a 13       | Q6R4B4       | 41057621  | 146      | KLRNSNITVQYDILER | 15   | 3324.0050  |
| Alternaria rot fungus | 5599        | Alt a 13       | Q6R4B4       | 41057621  | 166      | GQQYLAWLNEKFKRS  | 15   | 3324.0045  |
| Alternaria rot fungus | 5599        | Alt a 13       | Q6R4B4       | 41057621  | 171      | AWLNEKFKRSSYNRR  | 15   | 3324.0042  |
| Alternaria rot fungus | 5599        | Alt a 13       | Q6R4B4       | 41057621  | 191      | LCYEKYRRVVRAGVK  | 15   | 3324.0046  |
| Alternaria rot fungus | 5599        | Alt a 13       | Q6R4B4       | 41057621  | 201      | RAGVKVAQTARVVCV  | 15   | 3324.0047  |
| Alternaria rot fungus | 5599        | Alt a 3        | P78983       | 1850544   | 41       | SAKNALESYAYSRLN  | 15   | 3324.0053  |
| Alternaria rot fungus | 5599        | Alt a 3        | P78983       | 1850544   | 46       | LESYAYSRLNLTSDS  | 15   | 3324.0052  |
| Alternaria rot fungus | 5599        | Alt a 3        | P78983       | 1850544   | 91       | ATKDEYESQKKELEG  | 15   | 3337.0002  |
| Alternaria rot fungus | 5599        | Alt a 4        | Q00002       | 1006624   | 26       | ADKVVLVAYFAADDK  | 15   | 3324.0054  |
| Alternaria rot fungus | 5599        | Alt a 4        | Q00002       | 1006624   | 56       | NFLFGATNDAALAKA  | 15   | 3324.0061  |
| Alternaria rot fungus | 5599        | Alt a 4        | Q00002       | 1006624   | 96       | MRTYPRLRKVASTPL  | 15   | 3324.0060  |
| Alternaria rot fungus | 5599        | Alt a 4        | Q00002       | 1006624   | 101      | RLRKVASTPLIGEVG  | 15   | 3324.0059  |
| Alternaria rot fungus | 5599        | Alt a 4        | Q00002       | 1006624   | 116      | PETYAGYMAAGIPLA  | 15   | 3324.0057  |
| Alternaria rot fungus | 5599        | Alt a 4        | Q00002       | 1006624   | 121      | GYMAAGIPLAYIFAE  | 15   | 3324.0056  |
| Alternaria rot fungus | 5599        | Alt a 4        | Q00002       | 1006624   | 126      | GIPLAYIFAETPEER  | 15   | 3324.0058  |
| Alternaria rot fungus | 5599        | Alt a 4        | Q00002       | 1006624   | 156      | GEINFATIDAKSFGQ  | 15   | 3324.0062  |
| Alternaria rot fungus | 5599        | Alt a 4        | Q00002       | 1006624   | 286      | DELSKLVTIARVDAT  | 15   | 3324.0063  |
| Alternaria rot fungus | 5599        | Alt a 4        | Q00002       | 1006624   | 306      | DEIQGFLPSSLFPLA  | 15   | 3324.0055  |
| Alternaria rot fungus | 5599        | Alt a 5        | P42037       | 467617    | 1        | MKHLAAYLLGLGGN   | 15   | 3324.0064  |
| Alternaria rot fungus | 5599        | Alt a 5        | P42037       | 467617    | 21       | ADVKAVLESVGLHEAD | 15   | 3337.0003  |
| Alternaria rot fungus | 5599        | Alt a 5        | P42037       | 467617    | 51       | INELIASGSEKLASV  | 15   | 3324.0065  |
| Alternaria rot fungus | 5599        | Alt a 6        | Q9HDT3       | 14423684  | 1        | MTITKIHARSVYDSR  | 15   | 3324.0075  |

**Supplemental Table 1. Complete list of peptides synthesized.**

| Organism              | Taxonomy ID | Source protein | SwissProt ID | GI number | Position | Sequence         | Len. | Peptide ID |
|-----------------------|-------------|----------------|--------------|-----------|----------|------------------|------|------------|
| Alternaria rot fungus | 5599        | Alt a 6        | Q9HDT3       | 14423684  | 106      | LGANAILGVSMIAIAK | 15   | 3324.0069  |
| Alternaria rot fungus | 5599        | Alt a 6        | Q9HDT3       | 14423684  | 111      | ILGVSMIAIAKAAAEE | 15   | 3324.0070  |
| Alternaria rot fungus | 5599        | Alt a 6        | Q9HDT3       | 14423684  | 116      | MAIAKAAAAAEKGVPL | 15   | 3324.0074  |
| Alternaria rot fungus | 5599        | Alt a 6        | Q9HDT3       | 14423684  | 161      | GGRLAFQEFMIVPCE  | 15   | 3324.0073  |
| Alternaria rot fungus | 5599        | Alt a 6        | Q9HDT3       | 14423684  | 186      | GAEVYQKLKALAKKT  | 15   | 3324.0072  |
| Alternaria rot fungus | 5599        | Alt a 6        | Q9HDT3       | 14423684  | 241      | IKIAMDVASSEFYKA  | 15   | 3324.0077  |
| Alternaria rot fungus | 5599        | Alt a 6        | Q9HDT3       | 14423684  | 271      | KSKWLTYEQLAEMYK  | 15   | 3324.0068  |
| Alternaria rot fungus | 5599        | Alt a 6        | Q9HDT3       | 14423684  | 306      | EAWSYFFKTYDGGQIV | 15   | 3324.0067  |
| Alternaria rot fungus | 5599        | Alt a 6        | Q9HDT3       | 14423684  | 336      | IELKSCNALLLKVNQ  | 15   | 3324.0066  |
| Alternaria rot fungus | 5599        | Alt a 6        | Q9HDT3       | 14423684  | 341      | CNALLLKNVQIGTIT  | 15   | 3324.0071  |
| Alternaria rot fungus | 5599        | Alt a 6        | Q9HDT3       | 14423684  | 366      | GAGWGVMSVSHRSGET | 15   | 3324.0078  |
| Alternaria rot fungus | 5599        | Alt a 6        | Q9HDT3       | 14423684  | 406      | ERLAKLNQILRIEEE  | 15   | 3324.0076  |
| Alternaria rot fungus | 5599        | Alt a 7        | P42058       | 467619    | 6        | AIVYYSMYGHKKMA   | 15   | 3324.0085  |
| Alternaria rot fungus | 5599        | Alt a 7        | P42058       | 467619    | 31       | GGDAKLFQVAETLPQ  | 15   | 3324.0082  |
| Alternaria rot fungus | 5599        | Alt a 7        | P42058       | 467619    | 36       | LFQVAETLPQEVLDK  | 15   | 3324.0084  |
| Alternaria rot fungus | 5599        | Alt a 7        | P42058       | 467619    | 66       | PAVLEEFDGILFGIP  | 15   | 3324.0087  |
| Alternaria rot fungus | 5599        | Alt a 7        | P42058       | 467619    | 106      | FWGKYAGVVFSTGTL  | 15   | 3324.0086  |
| Alternaria rot fungus | 5599        | Alt a 7        | P42058       | 467619    | 141      | IYVPLGYKTAFSMLA  | 15   | 3324.0079  |
| Alternaria rot fungus | 5599        | Alt a 7        | P42058       | 467619    | 146      | GYKTAFSMLANLDEV  | 15   | 3324.0081  |
| Alternaria rot fungus | 5599        | Alt a 7        | P42058       | 467619    | 181      | SELELNIAQAQKCAF  | 15   | 3324.0083  |
| Alternaria rot fungus | 5599        | Alt a 7        | P42058       | 467619    | 190      | AQKCAFYEAVAKAHQ  | 15   | 3324.0080  |
| Alternaria rot fungus | 5599        | Alt a 8        | PoCoY4       | 23344707  | 6        | PQATELKDLSLKGK   | 15   | 3324.0090  |
| Alternaria rot fungus | 5599        | Alt a 8        | PoCoY4       | 23344707  | 11       | LKDLSLKGKVVIVT   | 15   | 3324.0091  |
| Alternaria rot fungus | 5599        | Alt a 8        | PoCoY4       | 23344707  | 46       | ADLAITYNSRAEGAE  | 15   | 3324.0094  |
| Alternaria rot fungus | 5599        | Alt a 8        | PoCoY4       | 23344707  | 151      | TGSLVITSSMSGHIA  | 15   | 3324.0093  |
| Alternaria rot fungus | 5599        | Alt a 8        | PoCoY4       | 23344707  | 176      | VAKAGCIHLAKSLAN  | 15   | 3324.0096  |
| Alternaria rot fungus | 5599        | Alt a 8        | PoCoY4       | 23344707  | 181      | CIHLAKSLANEWRDF  | 15   | 3324.0095  |
| Alternaria rot fungus | 5599        | Alt a 8        | PoCoY4       | 23344707  | 216      | QDIQKLWHSMPMGR   | 15   | 3324.0092  |
| Alternaria rot fungus | 5599        | Alt a 8        | PoCoY4       | 23344707  | 236      | ELKGAYVVFASDASS  | 15   | 3324.0088  |
| Alternaria rot fungus | 5599        | Alt a 8        | PoCoY4       | 23344707  | 241      | YVVFASDASSYCTGS  | 15   | 3324.0089  |
| American cockroach    | 6978        | Per a 1        | O18527       | 2231297   | 1        | INEIHSIIGLPPFPV  | 15   | 3324.1371  |
| American cockroach    | 6978        | Per a 1        | O18527       | 2231297   | 41       | DELKALFQEKLETSP  | 15   | 3324.1356  |
| American cockroach    | 6978        | Per a 1        | O18527       | 2231297   | 51       | LETSPDFKALYDAIR  | 15   | 3324.1378  |
| American cockroach    | 6978        | Per a 1        | O18527       | 2231297   | 56       | DFKALYDAIRSPPEF  | 15   | 3324.1375  |
| American cockroach    | 6978        | Per a 1        | O18527       | 2231297   | 66       | SPEFQSIISTLNAMQ  | 15   | 3324.1359  |
| American cockroach    | 6978        | Per a 1        | O18527       | 2231297   | 71       | SIISTLNAMQRSEHH  | 15   | 3324.1357  |
| American cockroach    | 6978        | Per a 1        | O18527       | 2231297   | 91       | KGVDVDHFIQLIRAL  | 15   | 3324.1363  |
| American cockroach    | 6978        | Per a 1        | O18527       | 2231297   | 96       | DHFIQLIRALFGLSR  | 15   | 3324.1347  |
| American cockroach    | 6978        | Per a 1        | O18527       | 2231297   | 101      | LIRALFGLSRAARNL  | 15   | 3324.1364  |
| American cockroach    | 6978        | Per a 1        | O18527       | 2231297   | 106      | FGLSRAARNLQDDLN  | 15   | 3324.1369  |
| American cockroach    | 6978        | Per a 1        | O18527       | 2231297   | 116      | QDDLNDLHLSLEPIS  | 15   | 3324.1373  |
| American cockroach    | 6978        | Per a 1        | O18527       | 2231297   | 151      | LHADDFFHKIITTIEA | 15   | 3324.1379  |
| American cockroach    | 6978        | Per a 1        | O18527       | 2231297   | 156      | FHKIITTIEALPEFA  | 15   | 3324.1351  |
| American cockroach    | 6978        | Per a 1        | O18527       | 2231297   | 166      | LPEFANFYNFLKEHG  | 15   | 3324.1355  |
| American cockroach    | 6978        | Per a 1        | O18527       | 2231297   | 171      | NFYNFLKEHGLDVVD  | 15   | 3324.1372  |
| American cockroach    | 6978        | Per a 1        | O18527       | 2231297   | 181      | LDVVDYINEIHSIIG  | 15   | 3324.1361  |
| American cockroach    | 6978        | Per a 1        | O18527       | 2231297   | 186      | YINEIHSIIGLPPFV  | 15   | 3324.1365  |
| American cockroach    | 6978        | Per a 1        | O18527       | 2231297   | 211      | VGINGLIDDVIAILP  | 15   | 3324.1368  |
| American cockroach    | 6978        | Per a 1        | O18527       | 2231297   | 216      | LIDDVIAILPVDELK  | 15   | 3324.1362  |
| American cockroach    | 6978        | Per a 1        | O18527       | 2231297   | 221      | IAILPVDELKALFQE  | 15   | 3324.1370  |
| American cockroach    | 6978        | Per a 1        | O18527       | 2231297   | 226      | VDELKALFQEKLETS  | 15   | 3324.1360  |
| American cockroach    | 6978        | Per a 1        | O18527       | 2231297   | 241      | PDFKALYDAIRSPPEF | 15   | 3324.1380  |
| American cockroach    | 6978        | Per a 1        | O18527       | 2231297   | 251      | RSPEFQSIISTLNAM  | 15   | 3324.1381  |
| American cockroach    | 6978        | Per a 1        | O18527       | 2231297   | 306      | DLNDFLALIPTDQIL  | 15   | 3324.1348  |
| American cockroach    | 6978        | Per a 1        | O18527       | 2231297   | 311      | LALIPTDQILAIAMD  | 15   | 3324.1377  |
| American cockroach    | 6978        | Per a 1        | O18527       | 2231297   | 316      | TDQILAIAMDYLAND  | 15   | 3324.1354  |
| American cockroach    | 6978        | Per a 1        | O18527       | 2231297   | 321      | AIAMDYLANDAEVQE  | 15   | 3324.1374  |
| American cockroach    | 6978        | Per a 1        | O18527       | 2231297   | 331      | AEVQELVAYLQSDDF  | 15   | 3324.1350  |
| American cockroach    | 6978        | Per a 1        | O18527       | 2231297   | 341      | QSDDFFHKIITTIEAL | 15   | 3324.1353  |
| American cockroach    | 6978        | Per a 1        | O18527       | 2231297   | 346      | HKIITTIEALPEFAN  | 15   | 3324.1352  |
| American cockroach    | 6978        | Per a 1        | O18527       | 2231297   | 356      | PEFANFYNFLKEHGL  | 15   | 3324.1349  |
| American cockroach    | 6978        | Per a 1        | O18527       | 2231297   | 361      | FYNFLKEHGLDVVDY  | 15   | 3324.1376  |
| American cockroach    | 6978        | Per a 1        | O18527       | 2231297   | 371      | DVVDYINEIHSIIGL  | 15   | 3324.1358  |
| American cockroach    | 6978        | Per a 1        | O18527       | 2231297   | 431      | DFKALYDAIDLRSSR  | 15   | 3324.1366  |
| American cockroach    | 6978        | Per a 1        | O18527       | 2231297   | 432      | FKALYDAIDLRSRRA  | 15   | 3324.1367  |
| American cockroach    | 6978        | Per a 10       | Q1MoX9       | 60678799  | 1        | MLRVLVLAASLIACSL | 15   | 3324.1382  |
| American cockroach    | 6978        | Per a 10       | Q1MoX9       | 60678799  | 6        | VLAASLIACSLSAVPK | 15   | 3324.1386  |
| American cockroach    | 6978        | Per a 10       | Q1MoX9       | 60678799  | 41       | YPYQLSFEYYGSHMC  | 15   | 3324.1383  |
| American cockroach    | 6978        | Per a 10       | Q1MoX9       | 60678799  | 96       | HQATQLIANPNYDYY  | 15   | 3324.1393  |

**Supplemental Table 1. Complete list of peptides synthesized.**

| Organism              | Taxonomy ID | Source protein | SwissProt ID | GI number | Position | Sequence         | Len. | Peptide ID |
|-----------------------|-------------|----------------|--------------|-----------|----------|------------------|------|------------|
| American cockroach    | 6978        | Per a 10       | Q1MoX9       | 60678799  | 106      | NYDYYTIDFDVAVAR  | 15   | 3324.1388  |
| American cockroach    | 6978        | Per a 10       | Q1MoX9       | 60678799  | 111      | TIDFDVAVARVSPAF  | 15   | 3324.1385  |
| American cockroach    | 6978        | Per a 10       | Q1MoX9       | 60678799  | 116      | VAVARVSPAFSYGTG  | 15   | 3324.1389  |
| American cockroach    | 6978        | Per a 10       | Q1MoX9       | 60678799  | 161      | TLPSQLQVVSVPIVS  | 15   | 3324.1387  |
| American cockroach    | 6978        | Per a 10       | Q1MoX9       | 60678799  | 166      | LQVVSVPVSRSECN   | 15   | 3324.1390  |
| American cockroach    | 6978        | Per a 10       | Q1MoX9       | 60678799  | 236      | PGVYSNVASLKGFFIT | 15   | 3324.1392  |
| American cockroach    | 6978        | Per a 10       | Q1MoX9       | 60678799  | 241      | NVASLKGFFITEQTGV | 15   | 3324.1391  |
| American cockroach    | 6978        | Per a 10       | Q1MoX9       | 60678799  | 242      | VASLKGFFITEQTGVN | 15   | 3324.1384  |
| American cockroach    | 6978        | Per a 3        | Q25640       | 1580794   | 1        | LNAFNMYFRYYIPTW  | 15   | 3324.1401  |
| American cockroach    | 6978        | Per a 3        | Q25640       | 1580794   | 6        | MYFRYYIPTWFNFTTL | 15   | 3324.1397  |
| American cockroach    | 6978        | Per a 3        | Q25640       | 1580794   | 31       | QFYTYHQIYARYFL   | 15   | 3324.1399  |
| American cockroach    | 6978        | Per a 3        | Q25640       | 1580794   | 36       | YHQIYARYFLERLSN  | 15   | 3324.1398  |
| American cockroach    | 6978        | Per a 3        | Q25640       | 1580794   | 41       | ARYFLERLSNSLDPV  | 15   | 3324.1395  |
| American cockroach    | 6978        | Per a 3        | Q25640       | 1580794   | 56       | KPFQYSKPLKTYGYNP | 15   | 3324.1409  |
| American cockroach    | 6978        | Per a 3        | Q25640       | 1580794   | 91       | NIDLFFVYSDIKNYES | 15   | 3324.1411  |
| American cockroach    | 6978        | Per a 3        | Q25640       | 1580794   | 141      | GTSNSPYQYFYGSIF  | 15   | 3324.1408  |
| American cockroach    | 6978        | Per a 3        | Q25640       | 1580794   | 146      | PYQYFYGSIFHFYRL  | 15   | 3324.1402  |
| American cockroach    | 6978        | Per a 3        | Q25640       | 1580794   | 151      | YGSIFHFYRLLVGHV  | 15   | 3324.1394  |
| American cockroach    | 6978        | Per a 3        | Q25640       | 1580794   | 156      | HFYRLLVGHVVDPYH  | 15   | 3324.1412  |
| American cockroach    | 6978        | Per a 3        | Q25640       | 1580794   | 191      | FYQLWKRIDHIVQKY  | 15   | 3324.1404  |
| American cockroach    | 6978        | Per a 3        | Q25640       | 1580794   | 196      | KRIDHIVQKYKRNRLP | 15   | 3324.1410  |
| American cockroach    | 6978        | Per a 3        | Q25640       | 1580794   | 231      | KLYTYFEHFEHSLGN  | 15   | 3324.1405  |
| American cockroach    | 6978        | Per a 3        | Q25640       | 1580794   | 236      | FEHFEHSLGNAMYLG  | 15   | 3324.1413  |
| American cockroach    | 6978        | Per a 3        | Q25640       | 1580794   | 271      | PFTYNIEVSSDKAQD  | 15   | 3324.1414  |
| American cockroach    | 6978        | Per a 3        | Q25640       | 1580794   | 281      | DKAQDVYVRIFLGPK  | 15   | 3324.1407  |
| American cockroach    | 6978        | Per a 3        | Q25640       | 1580794   | 346      | YRNLFKKVSDALEGK  | 15   | 3324.1403  |
| American cockroach    | 6978        | Per a 3        | Q25640       | 1580794   | 386      | GGQTFTFYVIVTPYV  | 15   | 3324.1396  |
| American cockroach    | 6978        | Per a 3        | Q25640       | 1580794   | 391      | TFYVIVTPYVKQDEH  | 15   | 3324.1400  |
| American cockroach    | 6978        | Per a 3        | Q25640       | 1580794   | 446      | YTPNMYFKDVFVIFHK | 15   | 3324.1415  |
| American cockroach    | 6978        | Per a 3        | Q25640       | 1580794   | 451      | YFKDVFVIFHKKYDEV | 15   | 3324.1406  |
| American cockroach    | 6978        | Per a 6        | Q1MoY3       | 60678791  | 6        | DEQIQLLKKAFDAFD  | 15   | 3324.1420  |
| American cockroach    | 6978        | Per a 6        | Q1MoY3       | 60678791  | 31       | MVGITILEMLGHPLDD | 15   | 3324.1418  |
| American cockroach    | 6978        | Per a 6        | Q1MoY3       | 60678791  | 61       | GELEFQEFVTLAARF  | 15   | 3324.1417  |
| American cockroach    | 6978        | Per a 6        | Q1MoY3       | 60678791  | 66       | QEFVTLAARFLVEED  | 15   | 3324.1416  |
| American cockroach    | 6978        | Per a 6        | Q1MoY3       | 60678791  | 101      | GYITTTVLRILKEL   | 15   | 3324.1419  |
| American cockroach    | 6978        | Per a 6        | Q1MoY3       | 60678791  | 106      | TVLREILKELDDKLT  | 15   | 3324.1421  |
| American cockroach    | 6978        | Per a 7        | Q9UB83       | 4468639   | 101      | RSEERLATATAKLAE  | 15   | 3324.1423  |
| American cockroach    | 6978        | Per a 7        | Q9UB83       | 4468639   | 191      | VELEEELRVVGNLTK  | 15   | 3324.1425  |
| American cockroach    | 6978        | Per a 7        | Q9UB83       | 4468639   | 216      | LREEEYKQIKTLTT   | 15   | 3324.1424  |
| American cockroach    | 6978        | Per a 7        | Q9UB83       | 4468639   | 221      | YKQIKTLTTRLKEA   | 15   | 3324.1422  |
| Ash                   | 38873       | Fra e 1        | Q6U740       | 34978692  | 21       | DTCRARFITKLSSEFI | 15   | 3324.1102  |
| Ash                   | 38873       | Fra e 1        | Q6U740       | 34978692  | 26       | RFITKLSSEFITGASV | 15   | 3324.1101  |
| Ash                   | 38873       | Fra e 1        | Q6U740       | 34978692  | 31       | LSEFITGASVRLQCR  | 15   | 3324.1105  |
| Ash                   | 38873       | Fra e 1        | Q6U740       | 34978692  | 76       | NEFCEITLLSSGRKD  | 15   | 3324.1106  |
| Ash                   | 38873       | Fra e 1        | Q6U740       | 34978692  | 101      | KPSLKFILNTVNGTT  | 15   | 3324.1103  |
| Ash                   | 38873       | Fra e 1        | Q6U740       | 34978692  | 121      | LGFFKKEALPQCAQV  | 15   | 3324.1104  |
| Aspergillus fumigatus | 330879      | Asp f 1        | P67875       | 66845737  | 1        | MVAIKNLFLLAATAV  | 15   | 3324.0121  |
| Aspergillus fumigatus | 330879      | Asp f 1        | P67875       | 66845737  | 6        | NLFLLAATAVSVLAA  | 15   | 3324.0122  |
| Aspergillus fumigatus | 330879      | Asp f 1        | P67875       | 66845737  | 46       | DKRLLYSQAKAESNS  | 15   | 3324.0123  |
| Aspergillus fumigatus | 330879      | Asp f 1        | P67875       | 66845737  | 116      | DDHYLLEFPPTFPDGH | 15   | 3337.0014  |
| Aspergillus fumigatus | 330879      | Asp f 1        | P67875       | 66845737  | 146      | ARVIYTYPNKVFCGI  | 15   | 3324.0124  |
| Aspergillus fumigatus | 330879      | Asp f 10       | Q12547(IUIS) | 85541049  | 1        | MVVFSKVTAVVVGSL  | 15   | 3324.0128  |
| Aspergillus fumigatus | 330879      | Asp f 10       | Q12547(IUIS) | 85541049  | 6        | KVTAVVVGSLTIVSA  | 15   | 3324.0129  |
| Aspergillus fumigatus | 330879      | Asp f 10       | Q12547(IUIS) | 85541049  | 11       | VVGLSTIVSAVPPVQ  | 15   | 3324.0126  |
| Aspergillus fumigatus | 330879      | Asp f 10       | Q12547(IUIS) | 85541049  | 16       | TIVSAVPPVQPRKGF  | 15   | 3324.0134  |
| Aspergillus fumigatus | 330879      | Asp f 10       | Q12547(IUIS) | 85541049  | 26       | PRKGFNTINQVARPVT | 15   | 3324.0136  |
| Aspergillus fumigatus | 330879      | Asp f 10       | Q12547(IUIS) | 85541049  | 41       | NKKTVNLPVAVYANAL | 15   | 3324.0132  |
| Aspergillus fumigatus | 330879      | Asp f 10       | Q12547(IUIS) | 85541049  | 46       | NLPVAVYANALTKYGG | 15   | 3324.0131  |
| Aspergillus fumigatus | 330879      | Asp f 10       | Q12547(IUIS) | 85541049  | 61       | TVPDSVKAASSGSA   | 15   | 3324.0137  |
| Aspergillus fumigatus | 330879      | Asp f 10       | Q12547(IUIS) | 85541049  | 106      | ADLWVFSSELSASQS  | 15   | 3324.0127  |
| Aspergillus fumigatus | 330879      | Asp f 10       | Q12547(IUIS) | 85541049  | 171      | VEAASHISSQFVQDK  | 15   | 3324.0125  |
| Aspergillus fumigatus | 330879      | Asp f 10       | Q12547(IUIS) | 85541049  | 186      | DNDGLGLAFSSINT   | 15   | 3324.0133  |
| Aspergillus fumigatus | 330879      | Asp f 10       | Q12547(IUIS) | 85541049  | 191      | LGLAFSSINTVSPRP  | 15   | 3324.0135  |
| Aspergillus fumigatus | 330879      | Asp f 10       | Q12547(IUIS) | 85541049  | 221      | LFAVTLKYHAPGTVD  | 15   | 3324.0130  |
| Aspergillus fumigatus | 746128      | Asp f 11       | Q9Y7F6       | 5019414   | 11       | VFFDVEYAPVGTAE   | 15   | 3324.0143  |
| Aspergillus fumigatus | 746128      | Asp f 11       | Q9Y7F6       | 5019414   | 26       | KVGRVFNFLFDKDV   | 15   | 3324.0144  |
| Aspergillus fumigatus | 746128      | Asp f 11       | Q9Y7F6       | 5019414   | 61       | STFHRIIPNFMIQGG  | 15   | 3324.0140  |
| Aspergillus fumigatus | 746128      | Asp f 11       | Q9Y7F6       | 5019414   | 101      | KHDKKGILSMANAGP  | 15   | 3324.0141  |
| Aspergillus fumigatus | 746128      | Asp f 11       | Q9Y7F6       | 5019414   | 116      | NTNGSQFFITTAVTS  | 15   | 3324.0138  |

**Supplemental Table 1. Complete list of peptides synthesized.**

| Organism              | Taxonomy ID | Source protein | SwissProt ID | GI number | Position | Sequence         | Len. | Peptide ID |
|-----------------------|-------------|----------------|--------------|-----------|----------|------------------|------|------------|
| Aspergillus fumigatus | 746128      | Asp f 11       | Q9Y7F6       | 5019414   | 121      | QFFITTAVTSWLDGK  | 15   | 3324.0139  |
| Aspergillus fumigatus | 746128      | Asp f 11       | Q9Y7F6       | 5019414   | 146      | KSYSVVKIEALGSS   | 15   | 3324.0142  |
| Aspergillus fumigatus | 330879      | Asp f 12       | P40292       | 1930153   | 1        | MSSETFEFQAEISQL  | 15   | 3324.0177  |
| Aspergillus fumigatus | 330879      | Asp f 12       | P40292       | 1930153   | 6        | FEFQAEISQLSLII   | 15   | 3324.0146  |
| Aspergillus fumigatus | 330879      | Asp f 12       | P40292       | 1930153   | 11       | EISQLLSLIINTVYS  | 15   | 3324.0151  |
| Aspergillus fumigatus | 330879      | Asp f 12       | P40292       | 1930153   | 16       | LSLIINTVYSNKEIF  | 15   | 3324.0165  |
| Aspergillus fumigatus | 330879      | Asp f 12       | P40292       | 1930153   | 26       | NKEIFLRELISNASD  | 15   | 3324.0147  |
| Aspergillus fumigatus | 330879      | Asp f 12       | P40292       | 1930153   | 31       | LRELISNASDALDKI  | 15   | 3324.0156  |
| Aspergillus fumigatus | 330879      | Asp f 12       | P40292       | 1930153   | 41       | ALDKIRYQSLSDPTK  | 15   | 3324.0172  |
| Aspergillus fumigatus | 330879      | Asp f 12       | P40292       | 1930153   | 96       | IARSGTKQFMELSA   | 15   | 3324.0173  |
| Aspergillus fumigatus | 330879      | Asp f 12       | P40292       | 1930153   | 101      | TKQFMEALSAGADIS  | 15   | 3324.0180  |
| Aspergillus fumigatus | 330879      | Asp f 12       | P40292       | 1930153   | 116      | MIGQFGVGFYSAYLV  | 15   | 3324.0166  |
| Aspergillus fumigatus | 330879      | Asp f 12       | P40292       | 1930153   | 121      | GVGFYSAYLVADRVT  | 15   | 3324.0149  |
| Aspergillus fumigatus | 330879      | Asp f 12       | P40292       | 1930153   | 126      | SAYLVADRVTVVSKN  | 15   | 3324.0171  |
| Aspergillus fumigatus | 330879      | Asp f 12       | P40292       | 1930153   | 171      | TKIILHLKDEQTDYL  | 15   | 3324.0179  |
| Aspergillus fumigatus | 330879      | Asp f 12       | P40292       | 1930153   | 191      | KEVVRKHSEFISYPI  | 15   | 3324.0161  |
| Aspergillus fumigatus | 330879      | Asp f 12       | P40292       | 1930153   | 196      | KHSEFISYPIYLHVL  | 15   | 3324.0155  |
| Aspergillus fumigatus | 330879      | Asp f 12       | P40292       | 1930153   | 281      | ITQEEYASFYKLSLN  | 15   | 3324.0152  |
| Aspergillus fumigatus | 330879      | Asp f 12       | P40292       | 1930153   | 301      | LAVKHFSVEGQLEFR  | 15   | 3324.0170  |
| Aspergillus fumigatus | 330879      | Asp f 12       | P40292       | 1930153   | 311      | QLEFRAILYVPKRAP  | 15   | 3324.0150  |
| Aspergillus fumigatus | 330879      | Asp f 12       | P40292       | 1930153   | 336      | NNIKLYVRRVFITDD  | 15   | 3324.0157  |
| Aspergillus fumigatus | 330879      | Asp f 12       | P40292       | 1930153   | 341      | YVRRVFITDDATDLI  | 15   | 3324.0158  |
| Aspergillus fumigatus | 330879      | Asp f 12       | P40292       | 1930153   | 391      | KNIVKKTLELNFNEIA | 15   | 3324.0175  |
| Aspergillus fumigatus | 330879      | Asp f 12       | P40292       | 1930153   | 406      | EDREQDFKFYSAFSK  | 15   | 3324.0159  |
| Aspergillus fumigatus | 330879      | Asp f 12       | P40292       | 1930153   | 411      | FDKFYSAFSKNIKLG  | 15   | 3324.0154  |
| Aspergillus fumigatus | 330879      | Asp f 12       | P40292       | 1930153   | 436      | LAKLLRYQSTKSGDE  | 15   | 3324.0176  |
| Aspergillus fumigatus | 330879      | Asp f 12       | P40292       | 1930153   | 466      | KQIYYITGESIKAVA  | 15   | 3324.0164  |
| Aspergillus fumigatus | 330879      | Asp f 12       | P40292       | 1930153   | 476      | IKAVAKSPFLDSLKQ  | 15   | 3324.0174  |
| Aspergillus fumigatus | 330879      | Asp f 12       | P40292       | 1930153   | 491      | KNFEVLFVDPIDEY   | 15   | 3324.0163  |
| Aspergillus fumigatus | 330879      | Asp f 12       | P40292       | 1930153   | 541      | EKEYENLAKSLKNIL  | 15   | 3324.0160  |
| Aspergillus fumigatus | 330879      | Asp f 12       | P40292       | 1930153   | 546      | NLAKSLKNILGDKVE  | 15   | 3324.0178  |
| Aspergillus fumigatus | 330879      | Asp f 12       | P40292       | 1930153   | 581      | GWSANMERIMKAQAL  | 15   | 3324.0167  |
| Aspergillus fumigatus | 330879      | Asp f 12       | P40292       | 1930153   | 586      | MERIMKAQALRDTSM  | 15   | 3324.0168  |
| Aspergillus fumigatus | 330879      | Asp f 12       | P40292       | 1930153   | 631      | ENDRTVKSITQLLFE  | 15   | 3324.0153  |
| Aspergillus fumigatus | 330879      | Asp f 12       | P40292       | 1930153   | 636      | VKSITQLLFETSLLV  | 15   | 3324.0145  |
| Aspergillus fumigatus | 330879      | Asp f 12       | P40292       | 1930153   | 641      | QLLFETSLLVSGFTI  | 15   | 3324.0148  |
| Aspergillus fumigatus | 330879      | Asp f 12       | P40292       | 1930153   | 661      | FAERIHKLVSGLGNI  | 15   | 3324.0162  |
| Aspergillus fumigatus | 330879      | Asp f 12       | P40292       | 1930153   | 666      | HKLVSGLGNIDEEEA  | 15   | 3324.0169  |
| Aspergillus fumigatus | 330879      | Asp f 13       | P28296       | 83305202  | 1        | MLSIKRTLIIIGAVL  | 15   | 3324.0183  |
| Aspergillus fumigatus | 330879      | Asp f 13       | P28296       | 83305202  | 6        | RTLIIIGAVLPAVFG  | 15   | 3324.0181  |
| Aspergillus fumigatus | 330879      | Asp f 13       | P28296       | 83305202  | 81       | KSYKIKDFAAYAGSF  | 15   | 3324.0189  |
| Aspergillus fumigatus | 330879      | Asp f 13       | P28296       | 83305202  | 111      | HVEEDQIWLALDALT  | 15   | 3324.0182  |
| Aspergillus fumigatus | 330879      | Asp f 13       | P28296       | 83305202  | 116      | QIWLALDALTQKGAP  | 15   | 3324.0186  |
| Aspergillus fumigatus | 330879      | Asp f 13       | P28296       | 83305202  | 141      | QASTDYIYDTSAGAG  | 15   | 3324.0187  |
| Aspergillus fumigatus | 330879      | Asp f 13       | P28296       | 83305202  | 146      | YIYDTSAGAGTYAYV  | 15   | 3324.0195  |
| Aspergillus fumigatus | 330879      | Asp f 13       | P28296       | 83305202  | 211      | KTNLLSVKVFQGESS  | 15   | 3324.0185  |
| Aspergillus fumigatus | 330879      | Asp f 13       | P28296       | 83305202  | 216      | SVKVFQGESSSTI    | 15   | 3324.0193  |
| Aspergillus fumigatus | 330879      | Asp f 13       | P28296       | 83305202  | 231      | LDGFNWAVNDIVSKG  | 15   | 3324.0192  |
| Aspergillus fumigatus | 330879      | Asp f 13       | P28296       | 83305202  | 256      | LGGGYSYAFNNAVEN  | 15   | 3324.0190  |
| Aspergillus fumigatus | 330879      | Asp f 13       | P28296       | 83305202  | 296      | SAPNALTVAAINKSN  | 15   | 3324.0194  |
| Aspergillus fumigatus | 330879      | Asp f 13       | P28296       | 83305202  | 351      | ATPHIVGLSVYLMGL  | 15   | 3324.0184  |
| Aspergillus fumigatus | 330879      | Asp f 13       | P28296       | 83305202  | 356      | VGLSVYLMGLENLSG  | 15   | 3324.0188  |
| Aspergillus fumigatus | 330879      | Asp f 13       | P28296       | 83305202  | 361      | YLMGLENLSGPAAVT  | 15   | 3324.0191  |
| Aspergillus fumigatus | 330879      | Asp f 15       | O60022       | 66853233  | 1        | MKFTTPIISLISLFVS | 15   | 3324.0197  |
| Aspergillus fumigatus | 330879      | Asp f 15       | O60022       | 66853233  | 6        | PISLISLIVSSALAA  | 15   | 3324.0196  |
| Aspergillus fumigatus | 330879      | Asp f 15       | O60022       | 66853233  | 11       | SLFVSSALAAPTPEN  | 15   | 3324.0198  |
| Aspergillus fumigatus | 330879      | Asp f 15       | O60022       | 66853233  | 91       | GKCYKLQYEQNTIYV  | 15   | 3324.0202  |
| Aspergillus fumigatus | 330879      | Asp f 15       | O60022       | 66853233  | 96       | LQYEQNTIYVTAIDA  | 15   | 3324.0201  |
| Aspergillus fumigatus | 330879      | Asp f 15       | O60022       | 66853233  | 101      | NTIYVTAIDAAPGGF  | 15   | 3324.0200  |
| Aspergillus fumigatus | 330879      | Asp f 15       | O60022       | 66853233  | 111      | APGGFNIAATSAMDQL | 15   | 3324.0199  |
| Aspergillus fumigatus | 746128      | Asp f 16       | O74682(IUIS) | 3643812   | 1        | MYFKYTAALAAVLPL  | 15   | 3324.0204  |
| Aspergillus fumigatus | 746128      | Asp f 16       | O74682(IUIS) | 3643812   | 6        | TAAALAAVLPLCSAQ  | 15   | 3324.0205  |
| Aspergillus fumigatus | 746128      | Asp f 16       | O74682(IUIS) | 3643812   | 81       | PTIDTDFYFFFGKAE  | 15   | 3324.0206  |
| Aspergillus fumigatus | 746128      | Asp f 16       | O74682(IUIS) | 3643812   | 86       | DFYFFFGKAEVVMKA  | 15   | 3324.0203  |
| Aspergillus fumigatus | 746128      | Asp f 16       | O74682(IUIS) | 3643812   | 196      | PQTPMRLRLAAGPAA  | 15   | 3324.0207  |
| Aspergillus fumigatus | 746128      | Asp f 17       | O60025       | 2980819   | 11       | VGVISDISAQTSALA  | 15   | 3324.0208  |
| Aspergillus fumigatus | 746128      | Asp f 17       | O60025       | 2980819   | 91       | SKKDKFVAANAGGTV  | 15   | 3324.0212  |
| Aspergillus fumigatus | 746128      | Asp f 17       | O60025       | 2980819   | 101      | AGGTVYEDLKAQYTA  | 15   | 3324.0213  |
| Aspergillus fumigatus | 746128      | Asp f 17       | O60025       | 2980819   | 111      | AQYTAADSLAKAISA  | 15   | 3324.0214  |

**Supplemental Table 1. Complete list of peptides synthesized.**

| Organism              | Taxonomy ID | Source protein | SwissProt ID | GI number | Position | Sequence         | Len. | Peptide ID |
|-----------------------|-------------|----------------|--------------|-----------|----------|------------------|------|------------|
| Aspergillus fumigatus | 746128      | Asp f 17       | O60025       | 2980819   | 116      | ADSLAKAISAKVPES  | 15   | 3324.0209  |
| Aspergillus fumigatus | 746128      | Asp f 17       | O60025       | 2980819   | 131      | LSDIAAQLSAGITAA  | 15   | 3324.0211  |
| Aspergillus fumigatus | 746128      | Asp f 17       | O60025       | 2980819   | 136      | AQLSAGITAAIQKGI  | 15   | 3324.0210  |
| Aspergillus fumigatus | 330879      | Asp f 18       | P87184       | 66851354  | 1        | MKGYLSLSILPLLVA  | 15   | 3324.0217  |
| Aspergillus fumigatus | 330879      | Asp f 18       | P87184       | 66851354  | 6        | SLSILPLLVAASPVV  | 15   | 3324.0218  |
| Aspergillus fumigatus | 330879      | Asp f 18       | P87184       | 66851354  | 11       | PLLVAASPVVDSIH   | 15   | 3324.0221  |
| Aspergillus fumigatus | 330879      | Asp f 18       | P87184       | 66851354  | 26       | NGAAPILSSMNAKEV  | 15   | 3324.0231  |
| Aspergillus fumigatus | 330879      | Asp f 18       | P87184       | 66851354  | 46       | VVFKKHVNAESAAA   | 15   | 3324.0224  |
| Aspergillus fumigatus | 330879      | Asp f 18       | P87184       | 66851354  | 61       | HSWVQDIHSAQNERV  | 15   | 3324.0220  |
| Aspergillus fumigatus | 330879      | Asp f 18       | P87184       | 66851354  | 91       | LGLKNTFDIAGSLVG  | 15   | 3324.0227  |
| Aspergillus fumigatus | 330879      | Asp f 18       | P87184       | 66851354  | 96       | TFDIAGSLVGYSGHF  | 15   | 3324.0233  |
| Aspergillus fumigatus | 330879      | Asp f 18       | P87184       | 66851354  | 236      | YAVKVLRSVSGSGTMS | 15   | 3324.0225  |
| Aspergillus fumigatus | 330879      | Asp f 18       | P87184       | 66851354  | 276      | KGFKGSVANMSLGGG  | 15   | 3324.0229  |
| Aspergillus fumigatus | 330879      | Asp f 18       | P87184       | 66851354  | 291      | KSRTLEAAVNAGVEA  | 15   | 3324.0230  |
| Aspergillus fumigatus | 330879      | Asp f 18       | P87184       | 66851354  | 301      | AGVEAGLHFVAAGN   | 15   | 3324.0222  |
| Aspergillus fumigatus | 330879      | Asp f 18       | P87184       | 66851354  | 381      | MASPHIAGLLAYFVS  | 15   | 3324.0219  |
| Aspergillus fumigatus | 330879      | Asp f 18       | P87184       | 66851354  | 386      | IAGLLAYFVSLQPSK  | 15   | 3324.0215  |
| Aspergillus fumigatus | 330879      | Asp f 18       | P87184       | 66851354  | 411      | PKKLLKDIHAIATQG  | 15   | 3324.0232  |
| Aspergillus fumigatus | 330879      | Asp f 18       | P87184       | 66851354  | 416      | KDIIAIATQGALTDI  | 15   | 3324.0216  |
| Aspergillus fumigatus | 330879      | Asp f 18       | P87184       | 66851354  | 451      | IIASGGYKVNASVKD  | 15   | 3324.0226  |
| Aspergillus fumigatus | 330879      | Asp f 18       | P87184       | 66851354  | 476      | KLLTEELGAIYSEIH  | 15   | 3324.0223  |
| Aspergillus fumigatus | 330879      | Asp f 18       | P87184       | 66851354  | 481      | ELGAIYSEIHDAAVA  | 15   | 3324.0228  |
| Aspergillus fumigatus | 330879      | Asp f 2        | P79017       | 66849502  | 1        | MAALLRLAVLLPLAA  | 15   | 3324.0236  |
| Aspergillus fumigatus | 330879      | Asp f 2        | P79017       | 66849502  | 6        | RLAVLLPLAAPLVAT  | 15   | 3324.0235  |
| Aspergillus fumigatus | 330879      | Asp f 2        | P79017       | 66849502  | 16       | PLVATLPTSPVPIAA  | 15   | 3324.0242  |
| Aspergillus fumigatus | 330879      | Asp f 2        | P79017       | 66849502  | 36       | EPVFFSWDAGAVTSF  | 15   | 3324.0238  |
| Aspergillus fumigatus | 330879      | Asp f 2        | P79017       | 66849502  | 41       | SWDAGAVTSFPIHSS  | 15   | 3324.0239  |
| Aspergillus fumigatus | 330879      | Asp f 2        | P79017       | 66849502  | 156      | TTRRWLVSMCSQGYT  | 15   | 3324.0243  |
| Aspergillus fumigatus | 330879      | Asp f 2        | P79017       | 66849502  | 206      | YDEVIALAKSNGTES  | 15   | 3324.0241  |
| Aspergillus fumigatus | 330879      | Asp f 2        | P79017       | 66849502  | 221      | THDSEALQYFALEAY  | 15   | 3324.0240  |
| Aspergillus fumigatus | 330879      | Asp f 2        | P79017       | 66849502  | 226      | ALQYFALEAYAFDIA  | 15   | 3324.0234  |
| Aspergillus fumigatus | 330879      | Asp f 2        | P79017       | 66849502  | 231      | ALEAYAFDIAAPGVG  | 15   | 3324.0237  |
| Aspergillus fumigatus | 330879      | Asp f 22       | Q96X30       | 13925873  | 1        | MPISKIHARSVYDSR  | 15   | 3324.0256  |
| Aspergillus fumigatus | 330879      | Asp f 22       | Q96X30       | 13925873  | 106      | LGANAILGVSLAVAK  | 15   | 3324.0245  |
| Aspergillus fumigatus | 330879      | Asp f 22       | Q96X30       | 13925873  | 111      | ILGVSLAVAKAGAAE  | 15   | 3324.0248  |
| Aspergillus fumigatus | 330879      | Asp f 22       | Q96X30       | 13925873  | 161      | GGRLAFQEFMIVPDS  | 15   | 3324.0252  |
| Aspergillus fumigatus | 330879      | Asp f 22       | Q96X30       | 13925873  | 166      | FQEFMIVPDSAPSFS  | 15   | 3324.0251  |
| Aspergillus fumigatus | 330879      | Asp f 22       | Q96X30       | 13925873  | 186      | GAEVYQKLKALAKKK  | 15   | 3324.0254  |
| Aspergillus fumigatus | 330879      | Asp f 22       | Q96X30       | 13925873  | 241      | IKIAMDVASSEFYKA  | 15   | 3324.0255  |
| Aspergillus fumigatus | 330879      | Asp f 22       | Q96X30       | 13925873  | 271      | PSKWLTYEQLADLYK  | 15   | 3324.0247  |
| Aspergillus fumigatus | 330879      | Asp f 22       | Q96X30       | 13925873  | 281      | ADLYKSLAAKYPIVS  | 15   | 3324.0244  |
| Aspergillus fumigatus | 330879      | Asp f 22       | Q96X30       | 13925873  | 306      | EAWSYFYKTSDFQIV  | 15   | 3324.0250  |
| Aspergillus fumigatus | 330879      | Asp f 22       | Q96X30       | 13925873  | 336      | IELKSNALLLKVNQ   | 15   | 3324.0246  |
| Aspergillus fumigatus | 330879      | Asp f 22       | Q96X30       | 13925873  | 341      | CNALLLKVNQIGTLT  | 15   | 3324.0249  |
| Aspergillus fumigatus | 330879      | Asp f 22       | Q96X30       | 13925873  | 406      | ERLAKLNQILRIEEE  | 15   | 3324.0253  |
| Aspergillus fumigatus | 330879      | Asp f 23       | Q8NKF4       | 66853155  | 71       | EIVEAVTIETPPLV   | 15   | 3324.0259  |
| Aspergillus fumigatus | 330879      | Asp f 23       | Q8NKF4       | 66853155  | 96       | PRGLRSLTTVWAEHL  | 15   | 3324.0257  |
| Aspergillus fumigatus | 330879      | Asp f 23       | Q8NKF4       | 66853155  | 151      | RIKKYCTVVRVLAHT  | 15   | 3324.0260  |
| Aspergillus fumigatus | 330879      | Asp f 23       | Q8NKF4       | 66853155  | 156      | CTVVRVLAHTQIRKT  | 15   | 3324.0258  |
| Aspergillus fumigatus | 330879      | Asp f 27       | Q4WVX5       | 71000343  | 1        | MVVKTFFDITIDGQP  | 15   | 3324.0265  |
| Aspergillus fumigatus | 330879      | Asp f 27       | Q4WVX5       | 71000343  | 21       | FKLFDEVVPKTVENF  | 15   | 3324.0266  |
| Aspergillus fumigatus | 330879      | Asp f 27       | Q4WVX5       | 71000343  | 46       | GYKGSFFHRIPQFM   | 15   | 3324.0261  |
| Aspergillus fumigatus | 330879      | Asp f 27       | Q4WVX5       | 71000343  | 51       | SFHRIPQFMLQGGD   | 15   | 3324.0263  |
| Aspergillus fumigatus | 330879      | Asp f 27       | Q4WVX5       | 71000343  | 91       | HDKPGLLSMANAGKN  | 15   | 3324.0267  |
| Aspergillus fumigatus | 330879      | Asp f 27       | Q4WVX5       | 71000343  | 106      | TNGSQFFITTVVTSW  | 15   | 3324.0262  |
| Aspergillus fumigatus | 330879      | Asp f 27       | Q4WVX5       | 71000343  | 111      | FFITTVVTSWLDGAH  | 15   | 3324.0264  |
| Aspergillus fumigatus | 746128      | Asp f 28       | Q1RQJ1       | 91680607  | 11       | NPIYKALTSSGPVV   | 15   | 3324.0270  |
| Aspergillus fumigatus | 746128      | Asp f 28       | Q1RQJ1       | 91680607  | 46       | LSEKYSNVRFIQVDV  | 15   | 3324.0271  |
| Aspergillus fumigatus | 746128      | Asp f 28       | Q1RQJ1       | 91680607  | 66       | VAHEMNIRAMPTFVL  | 15   | 3324.0268  |
| Aspergillus fumigatus | 746128      | Asp f 28       | Q1RQJ1       | 91680607  | 71       | NIRAMPTFVLYKDGQ  | 15   | 3324.0269  |
| Aspergillus fumigatus | 330879      | Asp f 29       | Q4WV97       | 70997545  | 41       | SPVFQRLSTSEEFKN  | 15   | 3324.0273  |
| Aspergillus fumigatus | 330879      | Asp f 29       | Q4WV97       | 70997545  | 56       | AKFYEIDVDELSEVA  | 15   | 3324.0272  |
| Aspergillus fumigatus | 330879      | Asp f 29       | Q4WV97       | 70997545  | 96       | ANPPALEAAIKAHVA  | 15   | 3337.0015  |
| Aspergillus fumigatus | 330879      | Asp f 3        | O43099       | 2769700   | 46       | KKVILFALPGAFTPV  | 15   | 3324.0274  |
| Aspergillus fumigatus | 330879      | Asp f 3        | O43099       | 2769700   | 81       | VDVVAVLAYNDAYVM  | 15   | 3324.0275  |
| Aspergillus fumigatus | 330879      | Asp f 3        | O43099       | 2769700   | 86       | VLAYNDAYVMSAWGK  | 15   | 3324.0277  |
| Aspergillus fumigatus | 330879      | Asp f 3        | O43099       | 2769700   | 106      | GDDILFLSDPDARFS  | 15   | 3324.0279  |
| Aspergillus fumigatus | 330879      | Asp f 3        | O43099       | 2769700   | 141      | HGKITYAALEPAKNH  | 15   | 3324.0278  |
| Aspergillus fumigatus | 330879      | Asp f 3        | O43099       | 2769700   | 154      | NHLEFSSAETVLKHL  | 15   | 3324.0276  |

**Supplemental Table 1. Complete list of peptides synthesized.**

| Organism              | Taxonomy ID | Source protein | SwissProt ID | GI number | Position | Sequence         | Len. | Peptide ID |
|-----------------------|-------------|----------------|--------------|-----------|----------|------------------|------|------------|
| Aspergillus fumigatus | 746128      | Asp f 34       | A4FSH5       | 133920236 | 1        | MQIKSFVLAASAAAT  | 15   | 3324.0280  |
| Aspergillus fumigatus | 746128      | Asp f 34       | A4FSH5       | 133920236 | 6        | FVLAASAAATASAAA  | 15   | 3324.0281  |
| Aspergillus fumigatus | 746128      | Asp f 34       | A4FSH5       | 133920236 | 26       | NKYFGVIAHSGSAV   | 15   | 3324.0283  |
| Aspergillus fumigatus | 746128      | Asp f 34       | A4FSH5       | 133920236 | 31       | IVAIHSGSAVYQPPF  | 15   | 3324.0282  |
| Aspergillus fumigatus | 746128      | Asp f 34       | A4FSH5       | 133920236 | 36       | SGSAVYQPPFSAAKS  | 15   | 3324.0287  |
| Aspergillus fumigatus | 746128      | Asp f 34       | A4FSH5       | 133920236 | 41       | YQPPFSAAKSSIFAG  | 15   | 3324.0286  |
| Aspergillus fumigatus | 746128      | Asp f 34       | A4FSH5       | 133920236 | 71       | ATFYIQDGSLLYLAA  | 15   | 3324.0285  |
| Aspergillus fumigatus | 746128      | Asp f 34       | A4FSH5       | 133920236 | 76       | QDGSLLYLAAASATPQ | 15   | 3324.0284  |
| Aspergillus fumigatus | 330879      | Asp f 4        | O60024       | 70989331  | 1        | MLKNSMMLLTALAA   | 15   | 3324.0289  |
| Aspergillus fumigatus | 330879      | Asp f 4        | O60024       | 70989331  | 6        | SMLLLTALAAGSSVA  | 15   | 3324.0290  |
| Aspergillus fumigatus | 330879      | Asp f 4        | O60024       | 70989331  | 41       | DTVYATINGVLVSWI  | 15   | 3324.0288  |
| Aspergillus fumigatus | 330879      | Asp f 4        | O60024       | 70989331  | 186      | TGWYGNLSALTLHLEA | 15   | 3324.0291  |
| Aspergillus fumigatus | 330879      | Asp f 4        | O60024       | 70989331  | 276      | GELCSHSHGLSKVI   | 15   | 3324.0293  |
| Aspergillus fumigatus | 330879      | Asp f 4        | O60024       | 70989331  | 286      | LSKVIDAYTADLAGV  | 15   | 3324.0292  |
| Aspergillus fumigatus | 330879      | Asp f 5        | P46075       | 3776613   | 1        | MRGLLLAGALALPAS  | 15   | 3324.0297  |
| Aspergillus fumigatus | 330879      | Asp f 5        | P46075       | 3776613   | 6        | LAGALALPASVFAHP  | 15   | 3324.0311  |
| Aspergillus fumigatus | 330879      | Asp f 5        | P46075       | 3776613   | 31       | TVDLNAFRLKSLAKY  | 15   | 3324.0299  |
| Aspergillus fumigatus | 330879      | Asp f 5        | P46075       | 3776613   | 36       | AFRLKSLAKYVNATE  | 15   | 3324.0300  |
| Aspergillus fumigatus | 330879      | Asp f 5        | P46075       | 3776613   | 41       | SLAKYVNATETVIEA  | 15   | 3324.0313  |
| Aspergillus fumigatus | 330879      | Asp f 5        | P46075       | 3776613   | 61       | PFKPKQSYVEVATQHV | 15   | 3324.0317  |
| Aspergillus fumigatus | 330879      | Asp f 5        | P46075       | 3776613   | 121      | KGDGKVFSYSGNSFYT | 15   | 3324.0306  |
| Aspergillus fumigatus | 330879      | Asp f 5        | P46075       | 3776613   | 181      | ESYVFKGVSGTVSDP  | 15   | 3324.0314  |
| Aspergillus fumigatus | 330879      | Asp f 5        | P46075       | 3776613   | 196      | KAKLVYFVKDDGTLA  | 15   | 3324.0308  |
| Aspergillus fumigatus | 330879      | Asp f 5        | P46075       | 3776613   | 221      | SNWLLTYIDAKSGEE  | 15   | 3324.0298  |
| Aspergillus fumigatus | 330879      | Asp f 5        | P46075       | 3776613   | 306      | SYLNNYRPSSSLSF   | 15   | 3324.0318  |
| Aspergillus fumigatus | 330879      | Asp f 5        | P46075       | 3776613   | 316      | SSLSFKYPYSSVSSP  | 15   | 3324.0309  |
| Aspergillus fumigatus | 330879      | Asp f 5        | P46075       | 3776613   | 331      | PSYIDASIIQLFYT   | 15   | 3324.0294  |
| Aspergillus fumigatus | 330879      | Asp f 5        | P46075       | 3776613   | 336      | DASHIQLFYTANIYH  | 15   | 3324.0296  |
| Aspergillus fumigatus | 330879      | Asp f 5        | P46075       | 3776613   | 341      | QLFYTANIYHDLLEYT | 15   | 3324.0304  |
| Aspergillus fumigatus | 330879      | Asp f 5        | P46075       | 3776613   | 346      | ANIYHDLLEYTLGFTE | 15   | 3324.0310  |
| Aspergillus fumigatus | 330879      | Asp f 5        | P46075       | 3776613   | 376      | GNDYVILNLAQDGSST | 15   | 3324.0315  |
| Aspergillus fumigatus | 330879      | Asp f 5        | P46075       | 3776613   | 426      | IVIHEYTHGLSNRLT  | 15   | 3324.0307  |
| Aspergillus fumigatus | 330879      | Asp f 5        | P46075       | 3776613   | 461      | WSDFMATAIRLKPGR  | 15   | 3324.0319  |
| Aspergillus fumigatus | 330879      | Asp f 5        | P46075       | 3776613   | 491      | AGGIRQYPYSTLSLT  | 15   | 3324.0302  |
| Aspergillus fumigatus | 330879      | Asp f 5        | P46075       | 3776613   | 506      | NPLTYTSVNSLNAVH  | 15   | 3324.0316  |
| Aspergillus fumigatus | 330879      | Asp f 5        | P46075       | 3776613   | 516      | LNAVHAIGTVWASML  | 15   | 3324.0312  |
| Aspergillus fumigatus | 330879      | Asp f 5        | P46075       | 3776613   | 521      | AIGTVWASMLYEVWL  | 15   | 3324.0305  |
| Aspergillus fumigatus | 330879      | Asp f 5        | P46075       | 3776613   | 526      | WASMLYEVWLWNLIDK | 15   | 3324.0295  |
| Aspergillus fumigatus | 330879      | Asp f 5        | P46075       | 3776613   | 556      | PTDGKYLAMKLVMDG  | 15   | 3324.0303  |
| Aspergillus fumigatus | 330879      | Asp f 5        | P46075       | 3776613   | 576      | CNPNFVQARDAILDA  | 15   | 3324.0301  |
| Aspergillus fumigatus | 330879      | Asp f 6        | Q92450       | 18158811  | 11       | PYPYDALQPYISQQI  | 15   | 3324.0322  |
| Aspergillus fumigatus | 330879      | Asp f 6        | Q92450       | 18158811  | 16       | ALQPYISQQIMELHH  | 15   | 3324.0321  |
| Aspergillus fumigatus | 330879      | Asp f 6        | Q92450       | 18158811  | 31       | KKHHQTYVNLNAAL   | 15   | 3324.0326  |
| Aspergillus fumigatus | 330879      | Asp f 6        | Q92450       | 18158811  | 36       | TYVNLNAALEAQKK   | 15   | 3324.0323  |
| Aspergillus fumigatus | 330879      | Asp f 6        | Q92450       | 18158811  | 56       | DVPKLVSVQQAIFKN  | 15   | 3324.0325  |
| Aspergillus fumigatus | 330879      | Asp f 6        | Q92450       | 18158811  | 61       | VSVQQAIFKNGGGHI  | 15   | 3324.0328  |
| Aspergillus fumigatus | 330879      | Asp f 6        | Q92450       | 18158811  | 111      | FDKFKDAFNITLLGI  | 15   | 3324.0324  |
| Aspergillus fumigatus | 330879      | Asp f 6        | Q92450       | 18158811  | 166      | EHAYYLQYLNDKASY  | 15   | 3324.0320  |
| Aspergillus fumigatus | 330879      | Asp f 6        | Q92450       | 18158811  | 171      | LQYLNDKASYAKGIW  | 15   | 3324.0327  |
| Aspergillus fumigatus | 330879      | Asp f 7        | O42799       | 2879888   | 1        | MAPIFKSLALVSALF  | 15   | 3324.0332  |
| Aspergillus fumigatus | 330879      | Asp f 7        | O42799       | 2879888   | 6        | KSLALVSALFAAIS   | 15   | 3324.0330  |
| Aspergillus fumigatus | 330879      | Asp f 7        | O42799       | 2879888   | 11       | VSALFAAIISSAAPVN | 15   | 3324.0331  |
| Aspergillus fumigatus | 330879      | Asp f 7        | O42799       | 2879888   | 96       | TQPSVATFIPVAAAA  | 15   | 3324.0334  |
| Aspergillus fumigatus | 330879      | Asp f 7        | O42799       | 2879888   | 101      | ATFIPVAAAAAADS   | 15   | 3324.0333  |
| Aspergillus fumigatus | 330879      | Asp f 7        | O42799       | 2879888   | 176      | LTYDYDTATSASAPSS | 15   | 3324.0335  |
| Aspergillus fumigatus | 330879      | Asp f 7        | O42799       | 2879888   | 196      | DGFSENVVLPVGM    | 15   | 3324.0329  |
| Aspergillus fumigatus | 330879      | Asp f 8        | Q9UUZ6       | 9887212   | 1        | MKHLAAYLLALAGN   | 15   | 3324.0336  |
| Aspergillus fumigatus | 330879      | Asp f 8        | Q9UUZ6       | 9887212   | 6        | AYLLALAGNTSPSS   | 15   | 3324.0337  |
| Aspergillus fumigatus | 330879      | Asp f 8        | Q9UUZ6       | 9887212   | 21       | EDVKAVLSSVGIDAD  | 15   | 3324.0338  |
| Aspergillus fumigatus | 330879      | Asp f 8        | Q9UUZ6       | 9887212   | 36       | EERLNKLAIELEKGD  | 15   | 3337.0016  |
| Aspergillus fumigatus | 330879      | Asp f 8        | Q9UUZ6       | 9887212   | 51       | LQELIAEGSTKLASV  | 15   | 3324.0339  |
| Aspergillus fumigatus | 330879      | Asp f 9        | O42800(IUIS) | 85540942  | 1        | KRSFILRSADMYFKY  | 15   | 3324.0342  |
| Aspergillus fumigatus | 330879      | Asp f 9        | O42800(IUIS) | 85540942  | 6        | LRSADMYFKYTAAL   | 15   | 3324.0343  |
| Aspergillus fumigatus | 330879      | Asp f 9        | O42800(IUIS) | 85540942  | 11       | MYFKYTAALAVLPL   | 15   | 3324.0341  |
| Aspergillus fumigatus | 330879      | Asp f 9        | O42800(IUIS) | 85540942  | 16       | TAAALAVLPLCSAQ   | 15   | 3324.0344  |
| Aspergillus fumigatus | 330879      | Asp f 9        | O42800(IUIS) | 85540942  | 51       | STYTADFTSASALDQ  | 15   | 3324.0346  |
| Aspergillus fumigatus | 330879      | Asp f 9        | O42800(IUIS) | 85540942  | 91       | PTIDTDFYFFFGKAE  | 15   | 3324.0345  |
| Aspergillus fumigatus | 330879      | Asp f 9        | O42800(IUIS) | 85540942  | 96       | DFYFFFGKAEVVMKA  | 15   | 3324.0340  |
| Bermuda grass         | 28909       | Cyn d 1        | Q947S4       | 16076697  | 1        | MLAVVAVVLASVMGG  | 15   | 3324.0633  |

**Supplemental Table 1. Complete list of peptides synthesized.**

| Organism      | Taxonomy ID | Source protein | SwissProt ID | GI number | Position | Sequence          | Len. | Peptide ID |
|---------------|-------------|----------------|--------------|-----------|----------|-------------------|------|------------|
| Bermuda grass | 28909       | Cyn d 1        | Q947S4       | 16076697  | 111      | ITDKNYEHIAAYHFD   | 15   | 3324.0637  |
| Bermuda grass | 28909       | Cyn d 1        | Q947S4       | 16076697  | 116      | YEHIAAYHFDLSGKA   | 15   | 3324.0634  |
| Bermuda grass | 28909       | Cyn d 1        | Q947S4       | 16076697  | 141      | DKLRKAGELMLQFRR   | 15   | 3324.0635  |
| Bermuda grass | 28909       | Cyn d 1        | Q947S4       | 16076697  | 176      | PNYLALLVKYAAAGDG  | 15   | 3324.0636  |
| Bermuda grass | 28909       | Cyn d 12       | O04725       | 2154728   | 31       | TVWAQSAAFPAPKPE   | 15   | 3324.0639  |
| Bermuda grass | 28909       | Cyn d 12       | O04725       | 2154728   | 66       | FLGPTKYMVIQGEPE   | 15   | 3324.0640  |
| Bermuda grass | 28909       | Cyn d 12       | O04725       | 2154728   | 71       | KYMVIQGEPEGAVIRG  | 15   | 3324.0638  |
| Bermuda grass | 28909       | Cyn d 15       | Q7XYF2       | 32344781  | 1        | MATLTFPVLLATMVG   | 15   | 3324.0641  |
| Bermuda grass | 28909       | Cyn d 15       | Q7XYF2       | 32344781  | 6        | FPVLLATMVGHWACV   | 15   | 3324.0642  |
| Bermuda grass | 28909       | Cyn d 15       | Q7XYF2       | 32344781  | 21       | NIIFHVEESSPKFAL   | 15   | 3324.0643  |
| Bermuda grass | 28909       | Cyn d 15       | Q7XYF2       | 32344781  | 71       | KPLKGPLNIRLRAEG   | 15   | 3337.0021  |
| Bermuda grass | 28909       | Cyn d 23       | Q7XYF3       | 32344779  | 1        | MAKVIAIILVATMVT   | 15   | 3324.0644  |
| Bermuda grass | 28909       | Cyn d 23       | Q7XYF3       | 32344779  | 6        | AHLVATMVTAAALVP   | 15   | 3324.0645  |
| Bermuda grass | 28909       | Cyn d 23       | Q7XYF3       | 32344779  | 11       | ATMVTAAALVPIECAT  | 15   | 3324.0648  |
| Bermuda grass | 28909       | Cyn d 23       | Q7XYF3       | 32344779  | 56       | DAAVNLMAMSFCIG    | 15   | 3324.0646  |
| Bermuda grass | 28909       | Cyn d 23       | Q7XYF3       | 32344779  | 61       | LMAMSFICIGWAKKA   | 15   | 3324.0647  |
| Bermuda grass | 28909       | Cyn d 23       | Q7XYF3       | 32344779  | 91       | AADQVLAAPAHKYK    | 15   | 3324.0649  |
| Bermuda grass | 28909       | Cyn d 7        | P94092       | 14423848  | 26       | ELTDALRTLGSATSAD  | 15   | 3324.0651  |
| Bermuda grass | 28909       | Cyn d 7        | P94092       | 14423848  | 31       | LRTLGSATSADDEVQRM | 15   | 3324.0652  |
| Bermuda grass | 28909       | Cyn d 7        | P94092       | 14423848  | 56       | FIDFDEFISFCNANP   | 15   | 3324.0650  |
| Birch         | 3505        | Bet v 1        | O23754       | 2414158   | 6        | YETETTSVIPAARLF   | 15   | 3324.0351  |
| Birch         | 3505        | Bet v 1        | O23754       | 2414158   | 11       | TSVIPAARLFKARFL   | 15   | 3324.0349  |
| Birch         | 3505        | Bet v 1        | O23754       | 2414158   | 76       | DHTNFKYSYSVIEGG   | 15   | 3324.0350  |
| Birch         | 3505        | Bet v 1        | O23754       | 2414158   | 96       | LEKISNEIKIVATPD   | 15   | 3324.0353  |
| Birch         | 3505        | Bet v 1        | O23754       | 2414158   | 111      | GGSLKISNKYHTKG    | 15   | 3324.0352  |
| Birch         | 3505        | Bet v 1        | O23754       | 2414158   | 141      | GETLLRAVESYLLAH   | 15   | 3324.0347  |
| Birch         | 3505        | Bet v 1        | O23754       | 2414158   | 146      | RAVESYLLAHSDAYN   | 15   | 3324.0348  |
| Birch         | 3505        | Bet v 2        | P25816       | 157830684 | 31       | DGSVWAQSSSFQPFK   | 15   | 3324.0355  |
| Birch         | 3505        | Bet v 2        | P25816       | 157830684 | 66       | GLHLGGIKYMVIOGGE  | 15   | 3324.0356  |
| Birch         | 3505        | Bet v 2        | P25816       | 157830684 | 71       | GIKYMVIOGGEAGAVI  | 15   | 3324.0354  |
| Birch         | 3505        | Bet v 3        | P43187       | 257675827 | 26       | NSSFRLRSESLNTRL   | 15   | 3324.0358  |
| Birch         | 3505        | Bet v 3        | P43187       | 257675827 | 31       | LRSESLNTRLRRRIF   | 15   | 3324.0360  |
| Birch         | 3505        | Bet v 3        | P43187       | 257675827 | 36       | LNTLRLRRIFDLDFDK  | 15   | 3324.0361  |
| Birch         | 3505        | Bet v 3        | P43187       | 257675827 | 56       | ITVDELSRALNLLGL   | 15   | 3324.0359  |
| Birch         | 3505        | Bet v 3        | P43187       | 257675827 | 61       | LSRALNLLGLETDL    | 15   | 3324.0364  |
| Birch         | 3505        | Bet v 3        | P43187       | 257675827 | 91       | GLQFEDFISLHQSLN   | 15   | 3324.0357  |
| Birch         | 3505        | Bet v 3        | P43187       | 257675827 | 96       | DFISLHQSLNDSYFA   | 15   | 3324.0365  |
| Birch         | 3505        | Bet v 3        | P43187       | 257675827 | 146      | GDGYISARELQMVLG   | 15   | 3324.0366  |
| Birch         | 3505        | Bet v 3        | P43187       | 257675827 | 171      | DRVEKMIVSVDSNRD   | 15   | 3324.0362  |
| Birch         | 3505        | Bet v 3        | P43187       | 257675827 | 191      | FEFKDMMRSVLRSS    | 15   | 3324.0363  |
| Birch         | 3505        | Bet v 4        | Q39419       | 2051993   | 31       | ELGEALKTLGSITPD   | 15   | 3324.0367  |
| Birch         | 3505        | Bet v 4        | Q39419       | 2051993   | 61       | FISFQEFTDFGRANR   | 15   | 3324.0368  |
| Birch         | 3505        | Bet v 4        | Q39419       | 2051993   | 71       | GRANRGLLKDVAKIF   | 15   | 3337.0017  |
| Birch         | 3505        | Bet v 6        | Q9FUW6       | 10764491  | 16       | IGKFIVEASAKSGHP   | 15   | 3324.0375  |
| Birch         | 3505        | Bet v 6        | Q9FUW6       | 10764491  | 46       | GKLVEKFKGLGVTL    | 15   | 3324.0374  |
| Birch         | 3505        | Bet v 6        | Q9FUW6       | 10764491  | 51       | KFKGLGVTLHGDLY    | 15   | 3324.0376  |
| Birch         | 3505        | Bet v 6        | Q9FUW6       | 10764491  | 71       | VKAFKQVDVVISTVG   | 15   | 3324.0384  |
| Birch         | 3505        | Bet v 6        | Q9FUW6       | 10764491  | 76       | QVDVVISTVGHQLA    | 15   | 3324.0389  |
| Birch         | 3505        | Bet v 6        | Q9FUW6       | 10764491  | 86       | HLQLADQVKIAAIK    | 15   | 3324.0381  |
| Birch         | 3505        | Bet v 6        | Q9FUW6       | 10764491  | 91       | DQVKIAAIKEAGNI    | 15   | 3324.0377  |
| Birch         | 3505        | Bet v 6        | Q9FUW6       | 10764491  | 101      | EAGNIKRFFPSEFGN   | 15   | 3324.0385  |
| Birch         | 3505        | Bet v 6        | Q9FUW6       | 10764491  | 141      | EAEGIPYTYVSSNFF   | 15   | 3324.0370  |
| Birch         | 3505        | Bet v 6        | Q9FUW6       | 10764491  | 146      | PYTYVSSNFFAGYFL   | 15   | 3324.0383  |
| Birch         | 3505        | Bet v 6        | Q9FUW6       | 10764491  | 151      | SSNFFAGYFLPTLAQ   | 15   | 3324.0373  |
| Birch         | 3505        | Bet v 6        | Q9FUW6       | 10764491  | 156      | AGYFLPTLAQPGLTS   | 15   | 3324.0388  |
| Birch         | 3505        | Bet v 6        | Q9FUW6       | 10764491  | 206      | RTLNKIVYIKPAKNI   | 15   | 3324.0387  |
| Birch         | 3505        | Bet v 6        | Q9FUW6       | 10764491  | 211      | IVYIKPAKNIYSFNE   | 15   | 3324.0386  |
| Birch         | 3505        | Bet v 6        | Q9FUW6       | 10764491  | 216      | PAKNIYSFNEIVALW   | 15   | 3324.0372  |
| Birch         | 3505        | Bet v 6        | Q9FUW6       | 10764491  | 221      | YSFNEIVALWEKKIG   | 15   | 3324.0371  |
| Birch         | 3505        | Bet v 6        | Q9FUW6       | 10764491  | 256      | PIPINVILAINHSVF   | 15   | 3324.0369  |
| Birch         | 3505        | Bet v 6        | Q9FUW6       | 10764491  | 261      | VILAINHSVFVKGDH   | 15   | 3324.0380  |
| Birch         | 3505        | Bet v 6        | Q9FUW6       | 10764491  | 276      | TNFEIASFGVEASE    | 15   | 3324.0379  |
| Birch         | 3505        | Bet v 6        | Q9FUW6       | 10764491  | 291      | LYPDVKYTTVEEYLQ   | 15   | 3324.0382  |
| Birch         | 3505        | Bet v 6        | Q9FUW6       | 10764491  | 294      | DVKYTTVEEYLQQVF   | 15   | 3324.0378  |
| Birch         | 3505        | Bet v 7        | P81531(IUIS) | 21431524  | 51       | GKPLHYKSSFHRVI    | 15   | 3324.0390  |
| Birch         | 3505        | Bet v 7        | P81531(IUIS) | 21431524  | 101      | TGPGILSMANAGPGT   | 15   | 3337.0018  |
| Birch         | 3505        | Bet v 7        | P81531(IUIS) | 21431524  | 116      | NGSQFFICTAKTEWL   | 15   | 3324.0391  |
| Black walnut  | 16719       | Jug n 1        | Q7Y1C2       | 31321942  | 6        | KCIFHTFSLTMARLA   | 15   | 3324.1111  |
| Black walnut  | 16719       | Jug n 1        | Q7Y1C2       | 31321942  | 11       | TFSLTMARLATLAL    | 15   | 3324.1110  |

**Supplemental Table 1. Complete list of peptides synthesized.**

| Organism      | Taxonomy ID | Source protein | SwissProt ID | GI number | Position | Sequence         | Len. | Peptide ID |
|---------------|-------------|----------------|--------------|-----------|----------|------------------|------|------------|
| Black walnut  | 16719       | Jug n 1        | Q7Y1C2       | 31321942  | 16       | MARLATLAALLVALL  | 15   | 3324.1108  |
| Black walnut  | 16719       | Jug n 1        | Q7Y1C2       | 31321942  | 21       | TLAALLVALLFVANA  | 15   | 3324.1109  |
| Black walnut  | 16719       | Jug n 1        | Q7Y1C2       | 31321942  | 26       | LVALLFVANAFAFRT  | 15   | 3324.1107  |
| Black walnut  | 16719       | Jug n 1        | Q7Y1C2       | 31321942  | 31       | FVANAFAFRTTITTM  | 15   | 3324.1112  |
| Black walnut  | 16719       | Jug n 1        | Q7Y1C2       | 31321942  | 36       | AAFRTTITTTMEIDED | 15   | 3324.1114  |
| Black walnut  | 16719       | Jug n 1        | Q7Y1C2       | 31321942  | 71       | LNHCQYYLRQQRSG   | 15   | 3324.1113  |
| Black walnut  | 16719       | Jug n 2        | Q7Y1C1       | 31321944  | 66       | RHNPPYFHSQSIRSR  | 15   | 3324.1119  |
| Black walnut  | 16719       | Jug n 2        | Q7Y1C1       | 31321944  | 86       | GEVKYLERFAERTEL  | 15   | 3324.1122  |
| Black walnut  | 16719       | Jug n 2        | Q7Y1C1       | 31321944  | 96       | ERTELLRGIENYRVV  | 15   | 3324.1121  |
| Black walnut  | 16719       | Jug n 2        | Q7Y1C1       | 31321944  | 101      | LRGIENYRVVILDAN  | 15   | 3324.1118  |
| Black walnut  | 16719       | Jug n 2        | Q7Y1C1       | 31321944  | 106      | NYRVVILDANPNTFM  | 15   | 3324.1125  |
| Black walnut  | 16719       | Jug n 2        | Q7Y1C1       | 31321944  | 191      | GQVREYYAAGAKSPD  | 15   | 3324.1126  |
| Black walnut  | 16719       | Jug n 2        | Q7Y1C1       | 31321944  | 206      | QSYLRVFSNDILVAA  | 15   | 3324.1115  |
| Black walnut  | 16719       | Jug n 2        | Q7Y1C1       | 31321944  | 211      | VFSNDILVAALNTPR  | 15   | 3324.1116  |
| Black walnut  | 16719       | Jug n 2        | Q7Y1C1       | 31321944  | 301      | LQEMDVLVNYAEIKR  | 15   | 3324.1123  |
| Black walnut  | 16719       | Jug n 2        | Q7Y1C1       | 31321944  | 366      | TGRFQKVTARLARGD  | 15   | 3324.1124  |
| Black walnut  | 16719       | Jug n 2        | Q7Y1C1       | 31321944  | 381      | IFVIPAGHPHAIITAS | 15   | 3324.1128  |
| Black walnut  | 16719       | Jug n 2        | Q7Y1C1       | 31321944  | 411      | NNQRNFLAGQNSIIN  | 15   | 3324.1117  |
| Black walnut  | 16719       | Jug n 2        | Q7Y1C1       | 31321944  | 416      | FLAGQNSIINQLERE  | 15   | 3324.1120  |
| Black walnut  | 16719       | Jug n 2        | Q7Y1C1       | 31321944  | 446      | IFESQMESYFVPTER  | 15   | 3324.1127  |
| Canary grass  | 28479       | Pha a 1        | Q41260       | 2498576   | 1        | MMKMVCSSSSSLLLV  | 15   | 3324.1430  |
| Canary grass  | 28479       | Pha a 1        | Q41260       | 2498576   | 11       | SLLLVAAALLAVFVG  | 15   | 3324.1426  |
| Canary grass  | 28479       | Pha a 1        | Q41260       | 2498576   | 16       | VAALLAVFVGSQAQGI | 15   | 3324.1427  |
| Canary grass  | 28479       | Pha a 1        | Q41260       | 2498576   | 126      | EEPIAPYHFDLSGHA  | 15   | 3324.1429  |
| Canary grass  | 28479       | Pha a 1        | Q41260       | 2498576   | 186      | PNYLALLVKYVDGDG  | 15   | 3324.1428  |
| Canary grass  | 28479       | Pha a 1        | Q41260       | 2498576   | 221      | SWGAIWRIDTPDKLT  | 15   | 3337.0039  |
| Canary grass  | 28479       | Pha a 5        | P56164       | 1246117   | 1        | MAVQKYMALFLAVA   | 15   | 3324.1434  |
| Canary grass  | 28479       | Pha a 5        | P56164       | 1246117   | 6        | YTMALFLAVALVAGP  | 15   | 3324.1431  |
| Canary grass  | 28479       | Pha a 5        | P56164       | 1246117   | 11       | FLAVALVAGPAAPTP  | 15   | 3324.1438  |
| Canary grass  | 28479       | Pha a 5        | P56164       | 1246117   | 101      | DAAYRVAYEAAEGST  | 15   | 3324.1443  |
| Canary grass  | 28479       | Pha a 5        | P56164       | 1246117   | 116      | PEAKYDAFIAALTEA  | 15   | 3324.1435  |
| Canary grass  | 28479       | Pha a 5        | P56164       | 1246117   | 121      | DAFIAALTEALRVIA  | 15   | 3324.1432  |
| Canary grass  | 28479       | Pha a 5        | P56164       | 1246117   | 126      | ALTEALRVIAGAFEV  | 15   | 3324.1437  |
| Canary grass  | 28479       | Pha a 5        | P56164       | 1246117   | 161      | VDKIDAAFKIAATAA  | 15   | 3324.1440  |
| Canary grass  | 28479       | Pha a 5        | P56164       | 1246117   | 166      | AAFKIAATAANSAPA  | 15   | 3324.1441  |
| Canary grass  | 28479       | Pha a 5        | P56164       | 1246117   | 181      | NDKFTVFEAGAFNKAI | 15   | 3324.1442  |
| Canary grass  | 28479       | Pha a 5        | P56164       | 1246117   | 201      | GAYETYKFIPSLAEEA | 15   | 3324.1433  |
| Canary grass  | 28479       | Pha a 5        | P56164       | 1246117   | 206      | YKFIPSLAEEAVKQAY | 15   | 3324.1436  |
| Canary grass  | 28479       | Pha a 5        | P56164       | 1246117   | 216      | VKQAYGATVARAPEV  | 15   | 3324.1444  |
| Canary grass  | 28479       | Pha a 5        | P56164       | 1246117   | 226      | RAPEVKYAVFEAGLT  | 15   | 3324.1439  |
| Cat epithelia | 9685        | Fel d 1 1      | P30438       | 146387241 | 1        | MKGACVLLVLLWAALL | 15   | 3324.1047  |
| Cat epithelia | 9685        | Fel d 1 1      | P30438       | 146387241 | 6        | VLVLLWAALLLISGG  | 15   | 3324.1046  |
| Cat epithelia | 9685        | Fel d 1 1      | P30438       | 146387241 | 41       | DEYVEQVAQYKALPV  | 15   | 3324.1049  |
| Cat epithelia | 9685        | Fel d 1 1      | P30438       | 146387241 | 46       | QVAQYKALPVVLENA  | 15   | 3324.1051  |
| Cat epithelia | 9685        | Fel d 1 1      | P30438       | 146387241 | 51       | KALPVVLENARILKN  | 15   | 3324.1048  |
| Cat epithelia | 9685        | Fel d 1 1      | P30438       | 146387241 | 78       | NALSVDLKIYTSPLC  | 15   | 3324.1050  |
| Cat epithelia | 9685        | Fel d 1 2      | P30440       | 146387241 | 1        | MRGALLVLLALLVTQA | 15   | 3324.1054  |
| Cat epithelia | 9685        | Fel d 1 2      | P30440       | 146387241 | 6        | LVLALLVTQALGVKMM | 15   | 3324.1053  |
| Cat epithelia | 9685        | Fel d 1 2      | P30440       | 146387241 | 21       | AETCPIFYDVFFAVA  | 15   | 3324.1056  |
| Cat epithelia | 9685        | Fel d 1 2      | P30440       | 146387241 | 26       | IFYDVFFAVANGNEL  | 15   | 3324.1052  |
| Cat epithelia | 9685        | Fel d 1 2      | P30440       | 146387241 | 36       | NGNELLLDLSLTKVN  | 15   | 3324.1055  |
| Cat epithelia | 9685        | Fel d 1 2      | P30440       | 146387241 | 66       | YVENGLISRVL DGLV | 15   | 3324.1057  |
| Cat epithelia | 9685        | Fel d 2        | P49064       | 30962111  | 1        | MKWVTFISLLLLFSS  | 15   | 3324.1058  |
| Cat epithelia | 9685        | Fel d 2        | P49064       | 30962111  | 6        | FISLLLLFSSAYSRG  | 15   | 3324.1063  |
| Cat epithelia | 9685        | Fel d 2        | P49064       | 30962111  | 41       | EHFRGLVLVAFSQYL  | 15   | 3324.1060  |
| Cat epithelia | 9685        | Fel d 2        | P49064       | 30962111  | 46       | LVLVAFSQYLQCPFP  | 15   | 3324.1061  |
| Cat epithelia | 9685        | Fel d 2        | P49064       | 30962111  | 61       | EDHVKLVNEVTEFAK  | 15   | 3324.1075  |
| Cat epithelia | 9685        | Fel d 2        | P49064       | 30962111  | 156      | QRFLGKLYEIAARRH  | 15   | 3324.1069  |
| Cat epithelia | 9685        | Fel d 2        | P49064       | 30962111  | 161      | KYLYEIAARRHPYFYA | 15   | 3324.1068  |
| Cat epithelia | 9685        | Fel d 2        | P49064       | 30962111  | 166      | IARRHPYFYAPELly  | 15   | 3324.1070  |
| Cat epithelia | 9685        | Fel d 2        | P49064       | 30962111  | 171      | PYFYAPELlyYAAEY  | 15   | 3324.1078  |
| Cat epithelia | 9685        | Fel d 2        | P49064       | 30962111  | 231      | GERAFKAWSVARLSQ  | 15   | 3324.1059  |
| Cat epithelia | 9685        | Fel d 2        | P49064       | 30962111  | 246      | KFPKAEFAEISKLV   | 15   | 3324.1077  |
| Cat epithelia | 9685        | Fel d 2        | P49064       | 30962111  | 346      | AKDVFLGTFlyEYSR  | 15   | 3324.1074  |
| Cat epithelia | 9685        | Fel d 2        | P49064       | 30962111  | 351      | LGTFLYEYSRRHPEY  | 15   | 3324.1076  |
| Cat epithelia | 9685        | Fel d 2        | P49064       | 30962111  | 361      | RHPEYSVSLLLRLAK  | 15   | 3324.1062  |
| Cat epithelia | 9685        | Fel d 2        | P49064       | 30962111  | 366      | SVSLLRLAKEYEAT   | 15   | 3324.1071  |
| Cat epithelia | 9685        | Fel d 2        | P49064       | 30962111  | 396      | HVFDEFKPLVEEPHN  | 15   | 3324.1072  |
| Cat epithelia | 9685        | Fel d 2        | P49064       | 30962111  | 421      | KLGEYGFQNALLVRY  | 15   | 3324.1065  |

**Supplemental Table 1. Complete list of peptides synthesized.**

| Organism              | Taxonomy ID | Source protein | SwissProt ID | GI number | Position | Sequence         | Len. | Peptide ID |
|-----------------------|-------------|----------------|--------------|-----------|----------|------------------|------|------------|
| Cat epithelia         | 9685        | Fel d 2        | P49064       | 30962111  | 426      | GFQNALLVRYTKKVP  | 15   | 3324.1080  |
| Cat epithelia         | 9685        | Fel d 2        | P49064       | 30962111  | 471      | SCAEDYLSVVLNRLC  | 15   | 3324.1064  |
| Cat epithelia         | 9685        | Fel d 2        | P49064       | 30962111  | 476      | YLSVVLNRLCVLHEK  | 15   | 3324.1066  |
| Cat epithelia         | 9685        | Fel d 2        | P49064       | 30962111  | 506      | VNRRPCFSALQVDET  | 15   | 3324.1081  |
| Cat epithelia         | 9685        | Fel d 2        | P49064       | 30962111  | 531      | FTFHADLCTLPEAEK  | 15   | 3324.1079  |
| Cat epithelia         | 9685        | Fel d 2        | P49064       | 30962111  | 546      | QIKKQSSALVELLKHK | 15   | 3324.1073  |
| Cat epithelia         | 9685        | Fel d 2        | P49064       | 30962111  | 594      | EEGPKLVAAAQAALA  | 15   | 3324.1067  |
| Cat epithelia         | 9685        | Fel d 3        | Q8WNR9       | 17939981  | 31       | TNETYQKFEAIEYKT  | 15   | 3324.1087  |
| Cat epithelia         | 9685        | Fel d 3        | Q8WNR9       | 17939981  | 41       | IEYKTQVVAGINYYI  | 15   | 3324.1083  |
| Cat epithelia         | 9685        | Fel d 3        | Q8WNR9       | 17939981  | 46       | QVVAGINYYIKVQVD  | 15   | 3324.1086  |
| Cat epithelia         | 9685        | Fel d 3        | Q8WNR9       | 17939981  | 51       | INYYIKVQVDDNRYI  | 15   | 3324.1084  |
| Cat epithelia         | 9685        | Fel d 3        | Q8WNR9       | 17939981  | 61       | DNRYIHIVFKGLPV   | 15   | 3324.1082  |
| Cat epithelia         | 9685        | Fel d 3        | Q8WNR9       | 17939981  | 66       | HIVFKGLPVQDSSL   | 15   | 3324.1085  |
| Cat epithelia         | 9685        | Fel d 4        | Q5VFH6       | 45775300  | 1        | MKLLLLLCLGLLVC   | 15   | 3324.1096  |
| Cat epithelia         | 9685        | Fel d 4        | Q5VFH6       | 45775300  | 31       | ISGEWYSILLASDVK  | 15   | 3324.1088  |
| Cat epithelia         | 9685        | Fel d 4        | Q5VFH6       | 45775300  | 36       | YSILLASDVKEKIEE  | 15   | 3324.1094  |
| Cat epithelia         | 9685        | Fel d 4        | Q5VFH6       | 45775300  | 51       | NGSMRVFVEHIKALD  | 15   | 3324.1098  |
| Cat epithelia         | 9685        | Fel d 4        | Q5VFH6       | 45775300  | 56       | VFVEHIKALDNSSLS  | 15   | 3324.1090  |
| Cat epithelia         | 9685        | Fel d 4        | Q5VFH6       | 45775300  | 61       | IKALDNSSLSFVFHT  | 15   | 3324.1091  |
| Cat epithelia         | 9685        | Fel d 4        | Q5VFH6       | 45775300  | 96       | YTVVYDGYNVFSIVE  | 15   | 3324.1100  |
| Cat epithelia         | 9685        | Fel d 4        | Q5VFH6       | 45775300  | 101      | DGYNVFSIVETVYDE  | 15   | 3324.1097  |
| Cat epithelia         | 9685        | Fel d 4        | Q5VFH6       | 45775300  | 106      | FSIVETVYDEYILLH  | 15   | 3324.1095  |
| Cat epithelia         | 9685        | Fel d 4        | Q5VFH6       | 45775300  | 111      | TVYDEYILLHLLNFD  | 15   | 3324.1089  |
| Cat epithelia         | 9685        | Fel d 4        | Q5VFH6       | 45775300  | 116      | YILLHLLNFDKTRPF  | 15   | 3324.1093  |
| Cat epithelia         | 9685        | Fel d 4        | Q5VFH6       | 45775300  | 121      | LLNFDKTRPFQLVFE  | 15   | 3324.1092  |
| Cat epithelia         | 9685        | Fel d 4        | Q5VFH6       | 45775300  | 126      | KTRPFQLVFEFYAREP | 15   | 3324.1099  |
| Cladosporium herbarum | 29918       | Cla h 10       | P40108       | 291047712 | 16       | QPTGLFINNEFVKGQ  | 15   | 3324.0559  |
| Cladosporium herbarum | 29918       | Cla h 10       | P40108       | 291047712 | 56       | DVDIAVAARKAFEG   | 15   | 3324.0561  |
| Cladosporium herbarum | 29918       | Cla h 10       | P40108       | 291047712 | 81       | GKLLNNLANLFEKNI  | 15   | 3324.0552  |
| Cladosporium herbarum | 29918       | Cla h 10       | P40108       | 291047712 | 86       | NLANLFEKNIIDLLAA | 15   | 3324.0565  |
| Cladosporium herbarum | 29918       | Cla h 10       | P40108       | 291047712 | 91       | FEKNIIDLLAAVESLD | 15   | 3324.0555  |
| Cladosporium herbarum | 29918       | Cla h 10       | P40108       | 291047712 | 166      | PLLMWAWKIGPAIAC  | 15   | 3324.0558  |
| Cladosporium herbarum | 29918       | Cla h 10       | P40108       | 291047712 | 191      | QTPGLGLVAASLVKE  | 15   | 3324.0557  |
| Cladosporium herbarum | 29918       | Cla h 10       | P40108       | 291047712 | 246      | RTILKAAASSNLKVK  | 15   | 3324.0566  |
| Cladosporium herbarum | 29918       | Cla h 10       | P40108       | 291047712 | 281      | AISWVNFVGIFFNHGQ | 15   | 3324.0553  |
| Cladosporium herbarum | 29918       | Cla h 10       | P40108       | 291047712 | 341      | SKVQFDRIMEYIQAG  | 15   | 3324.0560  |
| Cladosporium herbarum | 29918       | Cla h 10       | P40108       | 291047712 | 371      | DKGYFIEPTIFSNTV  | 15   | 3324.0554  |
| Cladosporium herbarum | 29918       | Cla h 10       | P40108       | 291047712 | 386      | EDMKIVKEEIFGPVC  | 15   | 3324.0556  |
| Cladosporium herbarum | 29918       | Cla h 10       | P40108       | 291047712 | 416      | NASTYGLAAAVHTKN  | 15   | 3324.0564  |
| Cladosporium herbarum | 29918       | Cla h 10       | P40108       | 291047712 | 431      | LNTAIEVSNALKAGT  | 15   | 3324.0563  |
| Cladosporium herbarum | 29918       | Cla h 10       | P40108       | 291047712 | 441      | LKAGTVWVNTYNTLH  | 15   | 3324.0562  |
| Cladosporium herbarum | 29918       | Cla h 12       | P50344       | 1710589   | 1        | MSAAELASSYAALIL  | 15   | 3324.0569  |
| Cladosporium herbarum | 29918       | Cla h 12       | P50344       | 1710589   | 6        | LASSYAALILADEGL  | 15   | 3324.0567  |
| Cladosporium herbarum | 29918       | Cla h 12       | P50344       | 1710589   | 21       | EITADKLQALISAAK  | 15   | 3324.0568  |
| Cladosporium herbarum | 29918       | Cla h 12       | P50344       | 1710589   | 26       | KLQALISAAKVPFIE  | 15   | 3324.0570  |
| Cladosporium herbarum | 29918       | Cla h 12       | P50344       | 1710589   | 36       | VPEIEPIWTSLFAKA  | 15   | 3324.0571  |
| Cladosporium herbarum | 29918       | Cla h 12       | P50344       | 1710589   | 41       | PIWTSLFAKALEGKD  | 15   | 3324.0572  |
| Cladosporium herbarum | 29918       | Cla h 5        | P42039       | 5777795   | 1        | MKYLA AFLLLGLAGN | 15   | 3324.0573  |
| Cladosporium herbarum | 29918       | Cla h 5        | P42039       | 5777795   | 6        | AFLLLGLAGNSSPSA  | 15   | 3324.0576  |
| Cladosporium herbarum | 29918       | Cla h 5        | P42039       | 5777795   | 21       | EDIKTVLSSVIGDAD  | 15   | 3324.0574  |
| Cladosporium herbarum | 29918       | Cla h 5        | P42039       | 5777795   | 46       | LEGKINELISSGSE   | 15   | 3324.0577  |
| Cladosporium herbarum | 29918       | Cla h 5        | P42039       | 5777795   | 51       | INELISSGSEKLASV  | 15   | 3324.0575  |
| Cladosporium herbarum | 29918       | Cla h 6        | P42040       | 467660    | 1        | MPISKIHSRYVYDSR  | 15   | 3324.0587  |
| Cladosporium herbarum | 29918       | Cla h 6        | P42040       | 467660    | 66       | VANVNEIAPALIKE   | 15   | 3324.0584  |
| Cladosporium herbarum | 29918       | Cla h 6        | P42040       | 467660    | 106      | IGANAILGVSMVAVAK | 15   | 3324.0579  |
| Cladosporium herbarum | 29918       | Cla h 6        | P42040       | 467660    | 111      | ILGVSMVAKAAAAAE  | 15   | 3324.0586  |
| Cladosporium herbarum | 29918       | Cla h 6        | P42040       | 467660    | 126      | KRVPLYAHISDLSGT  | 15   | 3324.0590  |
| Cladosporium herbarum | 29918       | Cla h 6        | P42040       | 467660    | 161      | GGRLAFQEFMIVPSG  | 15   | 3324.0588  |
| Cladosporium herbarum | 29918       | Cla h 6        | P42040       | 467660    | 166      | FQEFMIVPSGAPSFT  | 15   | 3324.0581  |
| Cladosporium herbarum | 29918       | Cla h 6        | P42040       | 467660    | 186      | GAEVYQKLSLTKKR   | 15   | 3324.0585  |
| Cladosporium herbarum | 29918       | Cla h 6        | P42040       | 467660    | 241      | IKIAMDVASSEFYKA  | 15   | 3324.0589  |
| Cladosporium herbarum | 29918       | Cla h 6        | P42040       | 467660    | 271      | KSKWITYEQLADQYK  | 15   | 3324.0594  |
| Cladosporium herbarum | 29918       | Cla h 6        | P42040       | 467660    | 281      | ADQYQLAAKYPIVS   | 15   | 3324.0593  |
| Cladosporium herbarum | 29918       | Cla h 6        | P42040       | 467660    | 306      | EAWSYFYKTSVSGDFQ | 15   | 3324.0580  |
| Cladosporium herbarum | 29918       | Cla h 6        | P42040       | 467660    | 341      | KACNALLKVNQIGT   | 15   | 3324.0578  |
| Cladosporium herbarum | 29918       | Cla h 6        | P42040       | 467660    | 346      | LLLKVNQIGTITEAI  | 15   | 3324.0591  |
| Cladosporium herbarum | 29918       | Cla h 6        | P42040       | 467660    | 366      | SFAAGWGVMSHRSG   | 15   | 3324.0583  |
| Cladosporium herbarum | 29918       | Cla h 6        | P42040       | 467660    | 386      | TIADIVVGLRAGQIK  | 15   | 3324.0592  |
| Cladosporium herbarum | 29918       | Cla h 6        | P42040       | 467660    | 411      | AKLNQILRIEELGD   | 15   | 3324.0582  |

**Supplemental Table 1. Complete list of peptides synthesized.**

| Organism              | Taxonomy ID | Source protein | SwissProt ID | GI number | Position | Sequence          | Len. | Peptide ID |
|-----------------------|-------------|----------------|--------------|-----------|----------|-------------------|------|------------|
| Cladosporium herbarum | 29918       | Cl a h 7       | P42059       | 1168970   | 1        | MAPKIIIFYSTWGH    | 15   | 3324.0597  |
| Cladosporium herbarum | 29918       | Cl a h 7       | P42059       | 1168970   | 131      | AMSTLSHHGIIVPL    | 15   | 3337.0019  |
| Cladosporium herbarum | 29918       | Cl a h 7       | P42059       | 1168970   | 141      | IYVPLGYKTTFFHLLG  | 15   | 3324.0595  |
| Cladosporium herbarum | 29918       | Cl a h 7       | P42059       | 1168970   | 190      | QGKAFYEAVAKVNFQ   | 15   | 3324.0596  |
| Cladosporium herbarum | 29918       | Cl a h 8       | PoCoY5       | 296863443 | 46       | GAAVAITYASRAQGA   | 15   | 3324.0600  |
| Cladosporium herbarum | 29918       | Cl a h 8       | PoCoY5       | 296863443 | 101      | QIDAFIANAGATADS   | 15   | 3324.0601  |
| Cladosporium herbarum | 29918       | Cl a h 8       | PoCoY5       | 296863443 | 151      | GTGSLVITASMSGHI   | 15   | 3324.0603  |
| Cladosporium herbarum | 29918       | Cl a h 8       | PoCoY5       | 296863443 | 181      | GCIHMARSLANEWRD   | 15   | 3324.0602  |
| Cladosporium herbarum | 29918       | Cl a h 8       | PoCoY5       | 296863443 | 236      | KELKGAYVVFASDAS   | 15   | 3324.0598  |
| Cladosporium herbarum | 29918       | Cl a h 8       | PoCoY5       | 296863443 | 241      | AYVVFASDASTYTTG   | 15   | 3324.0599  |
| Cypress               | 13415       | Cha o 1        | Q96385       | 219928905 | 1        | MASCTLLAVLVFLCA   | 15   | 3324.0519  |
| Cypress               | 13415       | Cha o 1        | Q96385       | 219928905 | 6        | LLAVLVFLCAIVSFC   | 15   | 3324.0518  |
| Cypress               | 13415       | Cha o 1        | Q96385       | 219928905 | 86       | ERSLWIIFSKNLNIK   | 15   | 3324.0517  |
| Cypress               | 13415       | Cha o 1        | Q96385       | 219928905 | 91       | IIFSKNLNIKLNMP    | 15   | 3324.0522  |
| Cypress               | 13415       | Cha o 1        | Q96385       | 219928905 | 96       | NLNIKLNMPPLYAGN   | 15   | 3324.0523  |
| Cypress               | 13415       | Cha o 1        | Q96385       | 219928905 | 126      | GPCLFMRTVSHVILH   | 15   | 3324.0520  |
| Cypress               | 13415       | Cha o 1        | Q96385       | 219928905 | 131      | MRTVSHVILHGLNIH   | 15   | 3324.0528  |
| Cypress               | 13415       | Cha o 1        | Q96385       | 219928905 | 151      | VSGNVLISEASGVVP   | 15   | 3324.0526  |
| Cypress               | 13415       | Cha o 1        | Q96385       | 219928905 | 196      | LVDVTLASTGVTISN   | 15   | 3324.0524  |
| Cypress               | 13415       | Cha o 1        | Q96385       | 219928905 | 211      | NHFFNHHKVMLLGHS   | 15   | 3324.0521  |
| Cypress               | 13415       | Cha o 1        | Q96385       | 219928905 | 231      | DKSMKVTVAFNQFGP   | 15   | 3324.0525  |
| Cypress               | 13415       | Cha o 1        | Q96385       | 219928905 | 256      | YGLIHAVANNNDPWS   | 15   | 3324.0527  |
| Cypress               | 13415       | Cha o 2        | Q7M1E7       | 47606004  | 1        | MGMKFMMAAVFLALQ   | 15   | 3324.0531  |
| Cypress               | 13415       | Cha o 2        | Q7M1E7       | 47606004  | 6        | MAAVAFALQLVIMA    | 15   | 3324.0529  |
| Cypress               | 13415       | Cha o 2        | Q7M1E7       | 47606004  | 11       | FLALQLIVMAAEDQ    | 15   | 3324.0532  |
| Cypress               | 13415       | Cha o 2        | Q7M1E7       | 47606004  | 31       | LDSDIEQYLRNSRSL   | 15   | 3324.0544  |
| Cypress               | 13415       | Cha o 2        | Q7M1E7       | 47606004  | 36       | EQYLRNSRSLKLVH    | 15   | 3324.0538  |
| Cypress               | 13415       | Cha o 2        | Q7M1E7       | 47606004  | 76       | EAFATTWNAACKKAS   | 15   | 3324.0551  |
| Cypress               | 13415       | Cha o 2        | Q7M1E7       | 47606004  | 81       | TWNAACKKASAVLLV   | 15   | 3324.0547  |
| Cypress               | 13415       | Cha o 2        | Q7M1E7       | 47606004  | 86       | CKKASAVLLVPANKK   | 15   | 3324.0534  |
| Cypress               | 13415       | Cha o 2        | Q7M1E7       | 47606004  | 96       | PANKKFFVNNLVFRG   | 15   | 3324.0533  |
| Cypress               | 13415       | Cha o 2        | Q7M1E7       | 47606004  | 131      | ARWKNSKIWLQFAQL   | 15   | 3324.0542  |
| Cypress               | 13415       | Cha o 2        | Q7M1E7       | 47606004  | 136      | SKIWLQFAQLTDFNL   | 15   | 3324.0530  |
| Cypress               | 13415       | Cha o 2        | Q7M1E7       | 47606004  | 181      | NRPTAIKIDYSKSVT   | 15   | 3324.0545  |
| Cypress               | 13415       | Cha o 2        | Q7M1E7       | 47606004  | 186      | IKIDYSKSVTVKELT   | 15   | 3324.0535  |
| Cypress               | 13415       | Cha o 2        | Q7M1E7       | 47606004  | 196      | VKELTLMNSPEFHLV   | 15   | 3324.0550  |
| Cypress               | 13415       | Cha o 2        | Q7M1E7       | 47606004  | 236      | IDIFASKRFHIEKCV   | 15   | 3324.0539  |
| Cypress               | 13415       | Cha o 2        | Q7M1E7       | 47606004  | 296      | HVHVNRKAFIDTQNG   | 15   | 3324.0543  |
| Cypress               | 13415       | Cha o 2        | Q7M1E7       | 47606004  | 321      | GLASYTTYENVEMIN   | 15   | 3324.0537  |
| Cypress               | 13415       | Cha o 2        | Q7M1E7       | 47606004  | 331      | VEMINSENILINQF    | 15   | 3324.0549  |
| Cypress               | 13415       | Cha o 2        | Q7M1E7       | 47606004  | 336      | SENILINQFYCTSA    | 15   | 3324.0540  |
| Cypress               | 13415       | Cha o 2        | Q7M1E7       | 47606004  | 366      | TYKNIHGTSATAAAI   | 15   | 3324.0548  |
| Cypress               | 13415       | Cha o 2        | Q7M1E7       | 47606004  | 376      | TAAAIQLMCSDSVPC   | 15   | 3324.0536  |
| Cypress               | 13415       | Cha o 2        | Q7M1E7       | 47606004  | 391      | TGIQLSNVSLKLTSG   | 15   | 3324.0541  |
| Cypress               | 13415       | Cha o 2        | Q7M1E7       | 47606004  | 481      | QPCKPKLIIVHPNKP   | 15   | 3324.0546  |
| Cypress               | 49011       | Cup a 1        | Q9SCG9       | 9087167   | 66       | KALWIIFSQNMNIK    | 15   | 3324.0604  |
| Cypress               | 49011       | Cup a 1        | Q9SCG9       | 9087167   | 71       | IFSQNMNIKLMPLY    | 15   | 3324.0607  |
| Cypress               | 49011       | Cup a 1        | Q9SCG9       | 9087167   | 76       | MNIKLMPLYVAGYK    | 15   | 3324.0613  |
| Cypress               | 49011       | Cup a 1        | Q9SCG9       | 9087167   | 106      | PCLFMRKASHVILHG   | 15   | 3324.0608  |
| Cypress               | 49011       | Cup a 1        | Q9SCG9       | 9087167   | 131      | LGDVLVSESIGVEPV   | 15   | 3324.0610  |
| Cypress               | 49011       | Cup a 1        | Q9SCG9       | 9087167   | 186      | TISNNHFFNHHKVM    | 15   | 3324.0612  |
| Cypress               | 49011       | Cup a 1        | Q9SCG9       | 9087167   | 191      | HFFNHHKVMMLLGHDD  | 15   | 3324.0605  |
| Cypress               | 49011       | Cup a 1        | Q9SCG9       | 9087167   | 211      | KSMKVTVAFNQFGPN   | 15   | 3324.0609  |
| Cypress               | 49011       | Cup a 1        | Q9SCG9       | 9087167   | 231      | PRARYGLVHVANNNY   | 15   | 3324.0611  |
| Cypress               | 49011       | Cup a 1        | Q9SCG9       | 9087167   | 316      | EDTNIYNSNEAFKVE   | 15   | 3324.0606  |
| Cypress               | 13469       | Cup s 1        | Q9M4S2       | 257321241 | 1        | MDSPCLIAVLVFLCA   | 15   | 3324.0617  |
| Cypress               | 13469       | Cup s 1        | Q9M4S2       | 257321241 | 6        | LIAVLVFLCAIVSCY   | 15   | 3324.0614  |
| Cypress               | 13469       | Cup s 1        | Q9M4S2       | 257321241 | 11       | VFLCAIVSCYSDNPI   | 15   | 3324.0625  |
| Cypress               | 13469       | Cup s 1        | Q9M4S2       | 257321241 | 86       | EKALWIIFSQNMNIK   | 15   | 3324.0615  |
| Cypress               | 13469       | Cup s 1        | Q9M4S2       | 257321241 | 91       | IIFSQNMNIKLMKMP   | 15   | 3324.0618  |
| Cypress               | 13469       | Cup s 1        | Q9M4S2       | 257321241 | 96       | NMNIKLMPLYVAGH    | 15   | 3324.0624  |
| Cypress               | 13469       | Cup s 1        | Q9M4S2       | 257321241 | 126      | GPCLFMRKVSHVILH   | 15   | 3324.0619  |
| Cypress               | 13469       | Cup s 1        | Q9M4S2       | 257321241 | 131      | MRKVSHVILHGLHIH   | 15   | 3324.0621  |
| Cypress               | 13469       | Cup s 1        | Q9M4S2       | 257321241 | 151      | VLGNVLVSESIGVEP   | 15   | 3324.0627  |
| Cypress               | 13469       | Cup s 1        | Q9M4S2       | 257321241 | 211      | NHFFNHHKVMMLLGHDD | 15   | 3324.0616  |
| Cypress               | 13469       | Cup s 1        | Q9M4S2       | 257321241 | 231      | DKSMKVTVAFNQFGP   | 15   | 3324.0622  |
| Cypress               | 13469       | Cup s 1        | Q9M4S2       | 257321241 | 256      | YGLVHVANNNDQWN    | 15   | 3324.0626  |
| Cypress               | 13469       | Cup s 1        | Q9M4S2       | 257321241 | 336      | TEETNIYTSNEAFKV   | 15   | 3324.0620  |
| Cypress               | 13469       | Cup s 1        | Q9M4S2       | 257321241 | 346      | EAFKVENGNLAPQLT   | 15   | 3324.0623  |

**Supplemental Table 1. Complete list of peptides synthesized.**

| Organism                        | Taxonomy ID | Source protein | SwissProt ID | GI number | Position | Sequence           | Len. | Peptide ID |
|---------------------------------|-------------|----------------|--------------|-----------|----------|--------------------|------|------------|
| Cypress                         | 13469       | Cup s 3        | Q69CS2       | 38456226  | 1        | MARVSELALLLVATS    | 15   | 3324.0629  |
| Cypress                         | 13469       | Cup s 3        | Q69CS2       | 38456226  | 6        | ELALLLVATS AISLH   | 15   | 3324.0628  |
| Cypress                         | 13469       | Cup s 3        | Q69CS2       | 38456226  | 11       | LVATS AISLHM QEAG  | 15   | 3324.0630  |
| Cypress                         | 13469       | Cup s 3        | Q69CS2       | 38456226  | 56       | TWTVNLAAGTASARF    | 15   | 3324.0632  |
| Cypress                         | 13469       | Cup s 3        | Q69CS2       | 38456226  | 116      | DYDVS LVDGFNIPL    | 15   | 3337.0020  |
| Cypress                         | 13469       | Cup s 3        | Q69CS2       | 38456226  | 121      | SLVDGFNIPLAINPT    | 15   | 3324.0631  |
| Date palm                       | 42345       | Pho d 2        | Q8L5D8       | 21322677  | 36       | SSSFPQFKSEITNI     | 15   | 3324.1549  |
| Date palm                       | 42345       | Pho d 2        | Q8L5D8       | 21322677  | 61       | APTGLYL GSTKYMVI   | 15   | 3324.1548  |
| Date palm                       | 42345       | Pho d 2        | Q8L5D8       | 21322677  | 66       | YLGSTKYMVIQGE PG   | 15   | 3324.1546  |
| Date palm                       | 42345       | Pho d 2        | Q8L5D8       | 21322677  | 71       | KYMV IQGEPGAVIRG   | 15   | 3324.1547  |
| Date palm                       | 42345       | Pho d 2        | Q8L5D8       | 21322677  | 91       | GVTVKKT NQALIFGI   | 15   | 3324.1550  |
| <i>Dermatophagoides farinae</i> | 6954        | Der f 1        | A1YW11       | 119633260 | 1        | MKFVLAIA SLLVLST   | 15   | 3324.0664  |
| <i>Dermatophagoides farinae</i> | 6954        | Der f 1        | A1YW11       | 119633260 | 6        | AIASLLVLSTVYARP    | 15   | 3324.0665  |
| <i>Dermatophagoides farinae</i> | 6954        | Der f 1        | A1YW11       | 119633260 | 11       | LVLSTVYAR PASIKT   | 15   | 3324.0677  |
| <i>Dermatophagoides farinae</i> | 6954        | Der f 1        | A1YW11       | 119633260 | 26       | FEEFKKAFNK NYATV   | 15   | 3324.0681  |
| <i>Dermatophagoides farinae</i> | 6954        | Der f 1        | A1YW11       | 119633260 | 46       | ARKNFLES LKYVEAN   | 15   | 3324.0668  |
| <i>Dermatophagoides farinae</i> | 6954        | Der f 1        | A1YW11       | 119633260 | 61       | KGAINHLS DLSLDEF   | 15   | 3324.0683  |
| <i>Dermatophagoides farinae</i> | 6954        | Der f 1        | A1YW11       | 119633260 | 71       | SLDEFKNRYLMSAEA    | 15   | 3324.0672  |
| <i>Dermatophagoides farinae</i> | 6954        | Der f 1        | A1YW11       | 119633260 | 76       | KNRYLMSAEAFEQLK    | 15   | 3324.0667  |
| <i>Dermatophagoides farinae</i> | 6954        | Der f 1        | A1YW11       | 119633260 | 81       | MSAEAFEQLKTQFDL    | 15   | 3324.0684  |
| <i>Dermatophagoides farinae</i> | 6954        | Der f 1        | A1YW11       | 119633260 | 86       | FEQLKTQFDLSEETS    | 15   | 3324.0682  |
| <i>Dermatophagoides farinae</i> | 6954        | Der f 1        | A1YW11       | 119633260 | 131      | GSCWAFSGVAATESA    | 15   | 3324.0670  |
| <i>Dermatophagoides farinae</i> | 6954        | Der f 1        | A1YW11       | 119633260 | 136      | FSGVAATESAYLAYS    | 15   | 3324.0666  |
| <i>Dermatophagoides farinae</i> | 6954        | Der f 1        | A1YW11       | 119633260 | 141      | ATESAYLAYS RNTSLD  | 15   | 3324.0674  |
| <i>Dermatophagoides farinae</i> | 6954        | Der f 1        | A1YW11       | 119633260 | 146      | YLAYS RNTSLDLSSEQE | 15   | 3324.0673  |
| <i>Dermatophagoides farinae</i> | 6954        | Der f 1        | A1YW11       | 119633260 | 176      | PRGIEYIQ QNGVVEE   | 15   | 3324.0679  |
| <i>Dermatophagoides farinae</i> | 6954        | Der f 1        | A1YW11       | 119633260 | 221      | PDVKQIREAL TQTHT   | 15   | 3324.0685  |
| <i>Dermatophagoides farinae</i> | 6954        | Der f 1        | A1YW11       | 119633260 | 231      | TQHTTAIAVHIGIKD    | 15   | 3324.0680  |
| <i>Dermatophagoides farinae</i> | 6954        | Der f 1        | A1YW11       | 119633260 | 241      | IGIKDLRAFQHYDGR    | 15   | 3324.0676  |
| <i>Dermatophagoides farinae</i> | 6954        | Der f 1        | A1YW11       | 119633260 | 296      | GDSGYGYFQAGNNLM    | 15   | 3324.0669  |
| <i>Dermatophagoides farinae</i> | 6954        | Der f 1        | A1YW11       | 119633260 | 301      | GYFQAGNNLMMIEQY    | 15   | 3324.0671  |
| <i>Dermatophagoides farinae</i> | 6954        | Der f 1        | A1YW11       | 119633260 | 306      | GNNLMMIEQYPYVVI    | 15   | 3324.0675  |
| <i>Dermatophagoides farinae</i> | 6954        | Der f 1        | A1YW11       | 119633260 | 307      | NNLMMIEQYPYVVIM    | 15   | 3324.0678  |
| <i>Dermatophagoides farinae</i> | 6954        | Der f 10       | Q23939       | 42559584  | 101      | RSEERLKIATAKLEE    | 15   | 3324.0686  |
| <i>Dermatophagoides farinae</i> | 6954        | Der f 10       | Q23939       | 42559584  | 106      | LKIATAKLEEASQSA    | 15   | 3324.0689  |
| <i>Dermatophagoides farinae</i> | 6954        | Der f 10       | Q23939       | 42559584  | 191      | VELEEELR VVGNLNLK  | 15   | 3324.0690  |
| <i>Dermatophagoides farinae</i> | 6954        | Der f 10       | Q23939       | 42559584  | 216      | QREEAYEQ QIRIMTA   | 15   | 3324.0688  |
| <i>Dermatophagoides farinae</i> | 6954        | Der f 10       | Q23939       | 42559584  | 221      | YEQQIRIMTAKLKEA    | 15   | 3324.0687  |
| <i>Dermatophagoides farinae</i> | 6954        | Der f 11       | Q967Z0       | 42559514  | 11       | KLRKLL EDVHIESEE   | 15   | 3324.0719  |
| <i>Dermatophagoides farinae</i> | 6954        | Der f 11       | Q967Z0       | 42559514  | 61       | KFQAEV FELLAQLET   | 15   | 3324.0692  |
| <i>Dermatophagoides farinae</i> | 6954        | Der f 11       | Q967Z0       | 42559514  | 66       | VFELLAQLETANKEK    | 15   | 3324.0696  |
| <i>Dermatophagoides farinae</i> | 6954        | Der f 11       | Q967Z0       | 42559514  | 96       | ELNIKIEINRTVIE     | 15   | 3324.0713  |
| <i>Dermatophagoides farinae</i> | 6954        | Der f 11       | Q967Z0       | 42559514  | 101      | IEEINRTVIELTSHK    | 15   | 3324.0718  |
| <i>Dermatophagoides farinae</i> | 6954        | Der f 11       | Q967Z0       | 42559514  | 131      | EVKLQLDNANHLKTQ    | 15   | 3324.0716  |
| <i>Dermatophagoides farinae</i> | 6954        | Der f 11       | Q967Z0       | 42559514  | 136      | LDNANHLKTQIAAQL    | 15   | 3324.0699  |
| <i>Dermatophagoides farinae</i> | 6954        | Der f 11       | Q967Z0       | 42559514  | 141      | HLKTQIAAQLEDTRH    | 15   | 3324.0717  |
| <i>Dermatophagoides farinae</i> | 6954        | Der f 11       | Q967Z0       | 42559514  | 171      | AHTLEVELES LKVQL   | 15   | 3324.0709  |
| <i>Dermatophagoides farinae</i> | 6954        | Der f 11       | Q967Z0       | 42559514  | 191      | ARLELERQLTKANGD    | 15   | 3324.0711  |
| <i>Dermatophagoides farinae</i> | 6954        | Der f 11       | Q967Z0       | 42559514  | 226      | ELRRKMAQKISEYEE    | 15   | 3324.0714  |
| <i>Dermatophagoides farinae</i> | 6954        | Der f 11       | Q967Z0       | 42559514  | 236      | SEYEEQLEALLNKCS    | 15   | 3324.0710  |
| <i>Dermatophagoides farinae</i> | 6954        | Der f 11       | Q967Z0       | 42559514  | 256      | KSRLQSEVEVLIMDL    | 15   | 3324.0720  |
| <i>Dermatophagoides farinae</i> | 6954        | Der f 11       | Q967Z0       | 42559514  | 261      | SEVEVLIMDLEKATR    | 15   | 3324.0706  |
| <i>Dermatophagoides farinae</i> | 6954        | Der f 11       | Q967Z0       | 42559514  | 281      | EKRVAQLEKINLDLK    | 15   | 3324.0697  |
| <i>Dermatophagoides farinae</i> | 6954        | Der f 11       | Q967Z0       | 42559514  | 311      | ELRVKIAELQKLQHE    | 15   | 3324.0715  |
| <i>Dermatophagoides farinae</i> | 6954        | Der f 11       | Q967Z0       | 42559514  | 316      | IAELQKLQHEYEKLR    | 15   | 3324.0704  |
| <i>Dermatophagoides farinae</i> | 6954        | Der f 11       | Q967Z0       | 42559514  | 376      | DELSAAYKEAETLRK    | 15   | 3324.0703  |
| <i>Dermatophagoides farinae</i> | 6954        | Der f 11       | Q967Z0       | 42559514  | 396      | NQRLLAELA QVRH DY  | 15   | 3324.0698  |
| <i>Dermatophagoides farinae</i> | 6954        | Der f 11       | Q967Z0       | 42559514  | 421      | IEALRKQYQIEIEQL    | 15   | 3324.0693  |
| <i>Dermatophagoides farinae</i> | 6954        | Der f 11       | Q967Z0       | 42559514  | 426      | KQYQIEIEQLNMR LA   | 15   | 3324.0695  |
| <i>Dermatophagoides farinae</i> | 6954        | Der f 11       | Q967Z0       | 42559514  | 431      | EIEQLNMR LAEAEAK   | 15   | 3324.0712  |
| <i>Dermatophagoides farinae</i> | 6954        | Der f 11       | Q967Z0       | 42559514  | 451      | ARLKKKYQAQITEL E   | 15   | 3324.0691  |
| <i>Dermatophagoides farinae</i> | 6954        | Der f 11       | Q967Z0       | 42559514  | 456      | KYQAQITEL ELSLDA   | 15   | 3324.0721  |
| <i>Dermatophagoides farinae</i> | 6954        | Der f 11       | Q967Z0       | 42559514  | 481      | TIKKQALQITELQAH    | 15   | 3324.0702  |
| <i>Dermatophagoides farinae</i> | 6954        | Der f 11       | Q967Z0       | 42559514  | 521      | QAELEEMRIALQAN     | 15   | 3324.0701  |
| <i>Dermatophagoides farinae</i> | 6954        | Der f 11       | Q967Z0       | 42559514  | 531      | LEQANRAKRQAEQLH    | 15   | 3324.0722  |
| <i>Dermatophagoides farinae</i> | 6954        | Der f 11       | Q967Z0       | 42559514  | 556      | TTINVNLSASAKSLE    | 15   | 3324.0708  |
| <i>Dermatophagoides farinae</i> | 6954        | Der f 11       | Q967Z0       | 42559514  | 566      | KSKLESEFSALQADY    | 15   | 3324.0705  |
| <i>Dermatophagoides farinae</i> | 6954        | Der f 11       | Q967Z0       | 42559514  | 596      | KLTIELKSTKDLLIE    | 15   | 3324.0694  |
| <i>Dermatophagoides farinae</i> | 6954        | Der f 11       | Q967Z0       | 42559514  | 601      | LKSTKDLLIEEQERL    | 15   | 3324.0700  |

**Supplemental Table 1. Complete list of peptides synthesized.**

| Organism                        | Taxonomy ID | Source protein | SwissProt ID | GI number | Position | Sequence         | Len. | Peptide ID |
|---------------------------------|-------------|----------------|--------------|-----------|----------|------------------|------|------------|
| <i>Dermatophagoides farinae</i> | 6954        | Der f 11       | Q967Z0       | 42559514  | 616      | VKLETVKKLSLEQEV  | 15   | 3324.0723  |
| <i>Dermatophagoides farinae</i> | 6954        | Der f 11       | Q967Z0       | 42559514  | 631      | TLHVRIEEVEANALA  | 15   | 3324.0707  |
| <i>Dermatophagoides farinae</i> | 6954        | Der f 13       | Q1M2P5       | 37958167  | 6        | GKYKLEKSEKDFEFL  | 15   | 3324.0727  |
| <i>Dermatophagoides farinae</i> | 6954        | Der f 13       | Q1M2P5       | 37958167  | 26       | GFMVKTAALKTKPTF  | 15   | 3324.0725  |
| <i>Dermatophagoides farinae</i> | 6954        | Der f 13       | Q1M2P5       | 37958167  | 46       | NDQYIFRSLSTFKNT  | 15   | 3324.0724  |
| <i>Dermatophagoides farinae</i> | 6954        | Der f 13       | Q1M2P5       | 37958167  | 51       | FRSLSTFKNTEAKFK  | 15   | 3324.0726  |
| <i>Dermatophagoides farinae</i> | 6954        | Der f 14       | Q94507       | 1545803   | 16       | TRRYVAELTAVGSPS  | 15   | 3324.0735  |
| <i>Dermatophagoides farinae</i> | 6954        | Der f 14       | Q94507       | 1545803   | 51       | KSPEHEFNTEFTIHA  | 15   | 3324.0731  |
| <i>Dermatophagoides farinae</i> | 6954        | Der f 14       | Q94507       | 1545803   | 91       | DKENNVNRKNQLNLQY | 15   | 3324.0737  |
| <i>Dermatophagoides farinae</i> | 6954        | Der f 14       | Q94507       | 1545803   | 96       | VRKNQLNLQYKFGAD  | 15   | 3324.0734  |
| <i>Dermatophagoides farinae</i> | 6954        | Der f 14       | Q94507       | 1545803   | 116      | VDYENEFNFNLRSS   | 15   | 3324.0738  |
| <i>Dermatophagoides farinae</i> | 6954        | Der f 14       | Q94507       | 1545803   | 141      | AKYMSHFPILNHHK   | 15   | 3324.0736  |
| <i>Dermatophagoides farinae</i> | 6954        | Der f 14       | Q94507       | 1545803   | 146      | SHFPILNHHKVNQFK  | 15   | 3324.0733  |
| <i>Dermatophagoides farinae</i> | 6954        | Der f 14       | Q94507       | 1545803   | 151      | LNHKNVNIQFKYRPFK | 15   | 3324.0730  |
| <i>Dermatophagoides farinae</i> | 6954        | Der f 14       | Q94507       | 1545803   | 156      | NIQFKYRPFKVNELN  | 15   | 3324.0732  |
| <i>Dermatophagoides farinae</i> | 6954        | Der f 14       | Q94507       | 1545803   | 181      | HKFQLMRNSQIEVEE  | 15   | 3324.0728  |
| <i>Dermatophagoides farinae</i> | 6954        | Der f 14       | Q94507       | 1545803   | 196      | VRPFKMHGNSDIKLM  | 15   | 3324.0739  |
| <i>Dermatophagoides farinae</i> | 6954        | Der f 14       | Q94507       | 1545803   | 311      | KIFINHKSEMTPKPTN | 15   | 3324.0729  |
| <i>Dermatophagoides farinae</i> | 6954        | Der f 15       | Q9U6R7       | 21444331  | 1        | MKTIIYAILSIMACIG | 15   | 3324.0740  |
| <i>Dermatophagoides farinae</i> | 6954        | Der f 15       | Q9U6R7       | 21444331  | 6        | AILSIMACIGLMNAS  | 15   | 3324.0744  |
| <i>Dermatophagoides farinae</i> | 6954        | Der f 15       | Q9U6R7       | 21444331  | 11       | MACIGLMNASIKRDH  | 15   | 3324.0746  |
| <i>Dermatophagoides farinae</i> | 6954        | Der f 15       | Q9U6R7       | 21444331  | 91       | SWEKRGYERFNNLRL  | 15   | 3324.0747  |
| <i>Dermatophagoides farinae</i> | 6954        | Der f 15       | Q9U6R7       | 21444331  | 96       | GYERFNNLRLKNPEL  | 15   | 3324.0743  |
| <i>Dermatophagoides farinae</i> | 6954        | Der f 15       | Q9U6R7       | 21444331  | 106      | KNPELTTMISLGGWY  | 15   | 3324.0753  |
| <i>Dermatophagoides farinae</i> | 6954        | Der f 15       | Q9U6R7       | 21444331  | 131      | ANPTYRQQFIQSVLD  | 15   | 3324.0755  |
| <i>Dermatophagoides farinae</i> | 6954        | Der f 15       | Q9U6R7       | 21444331  | 136      | RQQFIQSVLDFLQEQY | 15   | 3324.0741  |
| <i>Dermatophagoides farinae</i> | 6954        | Der f 15       | Q9U6R7       | 21444331  | 171      | IDKQNYLALVRELKD  | 15   | 3324.0745  |
| <i>Dermatophagoides farinae</i> | 6954        | Der f 15       | Q9U6R7       | 21444331  | 176      | YLALVRELKDAFEPH  | 15   | 3324.0756  |
| <i>Dermatophagoides farinae</i> | 6954        | Der f 15       | Q9U6R7       | 21444331  | 186      | AFEPHGYLLTAAVSP  | 15   | 3324.0754  |
| <i>Dermatophagoides farinae</i> | 6954        | Der f 15       | Q9U6R7       | 21444331  | 231      | GWENFYGHNAPLYKR  | 15   | 3324.0748  |
| <i>Dermatophagoides farinae</i> | 6954        | Der f 15       | Q9U6R7       | 21444331  | 251      | ELHTYFNVNYTMHYY  | 15   | 3324.0742  |
| <i>Dermatophagoides farinae</i> | 6954        | Der f 15       | Q9U6R7       | 21444331  | 256      | FNVNYTMHYYLNGA   | 15   | 3324.0750  |
| <i>Dermatophagoides farinae</i> | 6954        | Der f 15       | Q9U6R7       | 21444331  | 316      | LSYIELCQLFQKEEW  | 15   | 3324.0749  |
| <i>Dermatophagoides farinae</i> | 6954        | Der f 15       | Q9U6R7       | 21444331  | 361      | KLAFKELGVSQVMV   | 15   | 3324.0751  |
| <i>Dermatophagoides farinae</i> | 6954        | Der f 15       | Q9U6R7       | 21444331  | 391      | NPLLNKVNHNMGDE   | 15   | 3324.0752  |
| <i>Dermatophagoides farinae</i> | 6954        | Der f 16       | Q8MVU3       | 21591547  | 6        | KNFDVPIGHTFFFI   | 15   | 3324.0777  |
| <i>Dermatophagoides farinae</i> | 6954        | Der f 16       | Q8MVU3       | 21591547  | 11       | IPIGHTFFFIWRIKQ  | 15   | 3324.0772  |
| <i>Dermatophagoides farinae</i> | 6954        | Der f 16       | Q8MVU3       | 21591547  | 16       | TTTTWRIKQFELVP   | 15   | 3324.0761  |
| <i>Dermatophagoides farinae</i> | 6954        | Der f 16       | Q8MVU3       | 21591547  | 21       | WRIKQFELVPVPKED  | 15   | 3324.0759  |
| <i>Dermatophagoides farinae</i> | 6954        | Der f 16       | Q8MVU3       | 21591547  | 111      | EIEEFESRQFSSYFK  | 15   | 3324.0774  |
| <i>Dermatophagoides farinae</i> | 6954        | Der f 16       | Q8MVU3       | 21591547  | 121      | SSYFKNGIHYLKGGY  | 15   | 3324.0760  |
| <i>Dermatophagoides farinae</i> | 6954        | Der f 16       | Q8MVU3       | 21591547  | 171      | VMNNGDVIFILLVNF  | 15   | 3324.0768  |
| <i>Dermatophagoides farinae</i> | 6954        | Der f 16       | Q8MVU3       | 21591547  | 176      | DVIFILLVNFVFWWT  | 15   | 3324.0757  |
| <i>Dermatophagoides farinae</i> | 6954        | Der f 16       | Q8MVU3       | 21591547  | 181      | LVPNFVFWVTGKHSN  | 15   | 3324.0773  |
| <i>Dermatophagoides farinae</i> | 6954        | Der f 16       | Q8MVU3       | 21591547  | 211      | SELNRFKLSVILED   | 15   | 3324.0758  |
| <i>Dermatophagoides farinae</i> | 6954        | Der f 16       | Q8MVU3       | 21591547  | 216      | FKLSSVILEDGKEVE  | 15   | 3324.0767  |
| <i>Dermatophagoides farinae</i> | 6954        | Der f 16       | Q8MVU3       | 21591547  | 236      | EYDAFNKALSLDKKD  | 15   | 3324.0775  |
| <i>Dermatophagoides farinae</i> | 6954        | Der f 16       | Q8MVU3       | 21591547  | 291      | ISFVKNGLSRADLD   | 15   | 3324.0776  |
| <i>Dermatophagoides farinae</i> | 6954        | Der f 16       | Q8MVU3       | 21591547  | 336      | IKYAMELINKKKYPN  | 15   | 3324.0771  |
| <i>Dermatophagoides farinae</i> | 6954        | Der f 16       | Q8MVU3       | 21591547  | 361      | DESVEFKSLFESWQM  | 15   | 3324.0770  |
| <i>Dermatophagoides farinae</i> | 6954        | Der f 16       | Q8MVU3       | 21591547  | 366      | FKSLFESWQMSQEK   | 15   | 3324.0763  |
| <i>Dermatophagoides farinae</i> | 6954        | Der f 16       | Q8MVU3       | 21591547  | 376      | SEQEKITSARLFRVS  | 15   | 3324.0769  |
| <i>Dermatophagoides farinae</i> | 6954        | Der f 16       | Q8MVU3       | 21591547  | 381      | ITSARLFRVSRNGIF  | 15   | 3324.0764  |
| <i>Dermatophagoides farinae</i> | 6954        | Der f 16       | Q8MVU3       | 21591547  | 416      | VMDKIYVWIGNQFAE  | 15   | 3324.0766  |
| <i>Dermatophagoides farinae</i> | 6954        | Der f 16       | Q8MVU3       | 21591547  | 421      | YVWIGNQFAERIADE  | 15   | 3324.0762  |
| <i>Dermatophagoides farinae</i> | 6954        | Der f 16       | Q8MVU3       | 21591547  | 451      | SGRKFQPNQIKLKK   | 15   | 3324.0765  |
| <i>Dermatophagoides farinae</i> | 6954        | Der f 18       | Q86R84       | 27550039  | 1        | MTRFSLTVLAVLAAC  | 15   | 3324.0778  |
| <i>Dermatophagoides farinae</i> | 6954        | Der f 18       | Q86R84       | 27550039  | 6        | LTVLAVLAACFGSNI  | 15   | 3324.0779  |
| <i>Dermatophagoides farinae</i> | 6954        | Der f 18       | Q86R84       | 27550039  | 56       | SLCTHIVSYFGIDA   | 15   | 3324.0786  |
| <i>Dermatophagoides farinae</i> | 6954        | Der f 18       | Q86R84       | 27550039  | 61       | IVYSYFGIDAATHEI  | 15   | 3324.0780  |
| <i>Dermatophagoides farinae</i> | 6954        | Der f 18       | Q86R84       | 27550039  | 71       | ATHEIKLLDEYLMKD  | 15   | 3324.0783  |
| <i>Dermatophagoides farinae</i> | 6954        | Der f 18       | Q86R84       | 27550039  | 121      | EHYRETFFVSTVDLML | 15   | 3324.0787  |
| <i>Dermatophagoides farinae</i> | 6954        | Der f 18       | Q86R84       | 27550039  | 126      | TFVSTVDLMLTRYGF  | 15   | 3324.0790  |
| <i>Dermatophagoides farinae</i> | 6954        | Der f 18       | Q86R84       | 27550039  | 171      | HTSFVMGVTLPATIA  | 15   | 3324.0789  |
| <i>Dermatophagoides farinae</i> | 6954        | Der f 18       | Q86R84       | 27550039  | 196      | SNYVDFMNVLSLDYT  | 15   | 3324.0781  |
| <i>Dermatophagoides farinae</i> | 6954        | Der f 18       | Q86R84       | 27550039  | 241      | HKMVMVAVPYARTWI  | 15   | 3324.0792  |
| <i>Dermatophagoides farinae</i> | 6954        | Der f 18       | Q86R84       | 27550039  | 246      | AVPFYARTWILEKMN  | 15   | 3324.0785  |
| <i>Dermatophagoides farinae</i> | 6954        | Der f 18       | Q86R84       | 27550039  | 281      | DGFLSYNELCVQIQA  | 15   | 3324.0782  |
| <i>Dermatophagoides farinae</i> | 6954        | Der f 18       | Q86R84       | 27550039  | 306      | HDNTAIYAVYVHSNH  | 15   | 3324.0791  |

**Supplemental Table 1. Complete list of peptides synthesized.**

| Organism                              | Taxonomy ID | Source protein | SwissProt ID | GI number | Position | Sequence         | Len. | Peptide ID |
|---------------------------------------|-------------|----------------|--------------|-----------|----------|------------------|------|------------|
| <i>Dermatophagoides farinae</i>       | 6954        | Der f 18       | Q86R84       | 27550039  | 311      | IYAVYVHNSHAEWIS  | 15   | 3324.0788  |
| <i>Dermatophagoides farinae</i>       | 6954        | Der f 18       | Q86R84       | 27550039  | 366      | PLLHAIQSNYYHGCV  | 15   | 3324.0784  |
| <i>Dermatophagoides farinae</i>       | 6954        | Der f 2        | Q00855       | 83755018  | 1        | MISKILCCLSLVAAV  | 15   | 3324.0794  |
| <i>Dermatophagoides farinae</i>       | 6954        | Der f 2        | Q00855       | 83755018  | 6        | LCLSLVAAVVADQV   | 15   | 3324.0793  |
| <i>Dermatophagoides farinae</i>       | 6954        | Der f 2        | Q00855       | 83755018  | 51       | PFTLEALFDANQNTK  | 15   | 3324.0795  |
| <i>Dermatophagoides farinae</i>       | 6954        | Der f 2        | Q00855       | 83755018  | 101      | QQYDIKYTWNVPKIA  | 15   | 3324.0796  |
| <i>Dermatophagoides farinae</i>       | 6954        | Der f 2        | Q00855       | 83755018  | 121      | VVVTVKLGIDNGVLA  | 15   | 3337.0026  |
| <i>Dermatophagoides farinae</i>       | 6954        | Der f 3        | P49275       | 1311457   | 1        | MMILTIIVVLLAANIL | 15   | 3324.0798  |
| <i>Dermatophagoides farinae</i>       | 6954        | Der f 3        | P49275       | 1311457   | 6        | IVVLLAANILATPIL  | 15   | 3324.0797  |
| <i>Dermatophagoides farinae</i>       | 6954        | Der f 3        | P49275       | 1311457   | 11       | AANILATPILPSSPN  | 15   | 3324.0803  |
| <i>Dermatophagoides farinae</i>       | 6954        | Der f 3        | P49275       | 1311457   | 36       | AGDCPYQISLQSSSH  | 15   | 3324.0804  |
| <i>Dermatophagoides farinae</i>       | 6954        | Der f 3        | P49275       | 1311457   | 41       | YQISLQSSSHFCGGS  | 15   | 3324.0802  |
| <i>Dermatophagoides farinae</i>       | 6954        | Der f 3        | P49275       | 1311457   | 56       | ILDEYWILTAACHVN  | 15   | 3324.0800  |
| <i>Dermatophagoides farinae</i>       | 6954        | Der f 3        | P49275       | 1311457   | 76       | KLIRYNTLKHASGG   | 15   | 3324.0799  |
| <i>Dermatophagoides farinae</i>       | 6954        | Der f 3        | P49275       | 1311457   | 111      | NDVALIKLKTPTMLD  | 15   | 3324.0801  |
| <i>Dermatophagoides farinae</i>       | 6954        | Der f 6        | P49276       | 14424450  | 1        | MIKIFLVTLIVITV   | 15   | 3324.0805  |
| <i>Dermatophagoides farinae</i>       | 6954        | Der f 6        | P49276       | 14424450  | 6        | LVTILIVITVTDAR   | 15   | 3324.0807  |
| <i>Dermatophagoides farinae</i>       | 6954        | Der f 6        | P49276       | 14424450  | 26       | QPKWAYLDSNEFPRS  | 15   | 3324.0810  |
| <i>Dermatophagoides farinae</i>       | 6954        | Der f 6        | P49276       | 14424450  | 61       | APFQISLLKDYILMK  | 15   | 3324.0806  |
| <i>Dermatophagoides farinae</i>       | 6954        | Der f 6        | P49276       | 14424450  | 66       | SLLKDYILMKRHMCG  | 15   | 3324.0811  |
| <i>Dermatophagoides farinae</i>       | 6954        | Der f 6        | P49276       | 14424450  | 141      | KTIILPNNPVVSTN   | 15   | 3324.0809  |
| <i>Dermatophagoides farinae</i>       | 6954        | Der f 6        | P49276       | 14424450  | 265      | TRPKYYLDWITKNIV  | 15   | 3324.0808  |
| <i>Dermatophagoides farinae</i>       | 6954        | Der f 7        | Q26456       | 1311689   | 1        | MMKFLLLAAVAFVAV  | 15   | 3324.0812  |
| <i>Dermatophagoides farinae</i>       | 6954        | Der f 7        | Q26456       | 1311689   | 6        | LAAVAVFVAVSADPI  | 15   | 3324.0813  |
| <i>Dermatophagoides farinae</i>       | 6954        | Der f 7        | Q26456       | 1311689   | 11       | AFVAVSADPIHYDKI  | 15   | 3324.0818  |
| <i>Dermatophagoides farinae</i>       | 6954        | Der f 7        | Q26456       | 1311689   | 111      | IVSMEYDLAYKLGDL  | 15   | 3324.0817  |
| <i>Dermatophagoides farinae</i>       | 6954        | Der f 7        | Q26456       | 1311689   | 131      | VISDIQDFVVALSLE  | 15   | 3324.0819  |
| <i>Dermatophagoides farinae</i>       | 6954        | Der f 7        | Q26456       | 1311689   | 136      | QDFVVALSLEISDEG  | 15   | 3324.0814  |
| <i>Dermatophagoides farinae</i>       | 6954        | Der f 7        | Q26456       | 1311689   | 156      | SFEVRQFANVVNHIG  | 15   | 3324.0815  |
| <i>Dermatophagoides farinae</i>       | 6954        | Der f 7        | Q26456       | 1311689   | 161      | QFANVVNHIGGLSIL  | 15   | 3324.0822  |
| <i>Dermatophagoides farinae</i>       | 6954        | Der f 7        | Q26456       | 1311689   | 166      | VNHIGGLSILDPFIF  | 15   | 3324.0821  |
| <i>Dermatophagoides farinae</i>       | 6954        | Der f 7        | Q26456       | 1311689   | 171      | GLSILDPFIFGLSDV  | 15   | 3324.0820  |
| <i>Dermatophagoides farinae</i>       | 6954        | Der f 7        | Q26456       | 1311689   | 176      | DPFIFGLSDVLTAF   | 15   | 3324.0816  |
| <i>Dermatophagoides pteronyssinus</i> | 6956        | Der p 1        | P08176       | 83754033  | 1        | MKIVLAIASLLALS   | 15   | 3324.0823  |
| <i>Dermatophagoides pteronyssinus</i> | 6956        | Der p 1        | P08176       | 83754033  | 6        | AIASLLALSVAAYAR  | 15   | 3324.0826  |
| <i>Dermatophagoides pteronyssinus</i> | 6956        | Der p 1        | P08176       | 83754033  | 11       | LALSVAAYARPSIKT  | 15   | 3324.0828  |
| <i>Dermatophagoides pteronyssinus</i> | 6956        | Der p 1        | P08176       | 83754033  | 31       | KAFNKSYATFEDEEA  | 15   | 3324.0834  |
| <i>Dermatophagoides pteronyssinus</i> | 6956        | Der p 1        | P08176       | 83754033  | 46       | ARKNFLESVKYQSN   | 15   | 3324.0839  |
| <i>Dermatophagoides pteronyssinus</i> | 6956        | Der p 1        | P08176       | 83754033  | 51       | LESVKYQSNNGAIN   | 15   | 3324.0838  |
| <i>Dermatophagoides pteronyssinus</i> | 6956        | Der p 1        | P08176       | 83754033  | 61       | GGAINHLSLSDLEDF  | 15   | 3324.0842  |
| <i>Dermatophagoides pteronyssinus</i> | 6956        | Der p 1        | P08176       | 83754033  | 71       | SLDEFKNRFLMSAEA  | 15   | 3324.0830  |
| <i>Dermatophagoides pteronyssinus</i> | 6956        | Der p 1        | P08176       | 83754033  | 76       | KNRFLMSAEAEFHLK  | 15   | 3324.0824  |
| <i>Dermatophagoides pteronyssinus</i> | 6956        | Der p 1        | P08176       | 83754033  | 81       | MSAEAEFHLKTFDL   | 15   | 3324.0844  |
| <i>Dermatophagoides pteronyssinus</i> | 6956        | Der p 1        | P08176       | 83754033  | 86       | FEHLKTFDLNAETN   | 15   | 3324.0841  |
| <i>Dermatophagoides pteronyssinus</i> | 6956        | Der p 1        | P08176       | 83754033  | 111      | EIDLRQMRVTPIRM   | 15   | 3324.0836  |
| <i>Dermatophagoides pteronyssinus</i> | 6956        | Der p 1        | P08176       | 83754033  | 131      | SCWAFSGVAATESAY  | 15   | 3324.0832  |
| <i>Dermatophagoides pteronyssinus</i> | 6956        | Der p 1        | P08176       | 83754033  | 136      | SGVAATESAYLAYRN  | 15   | 3324.0829  |
| <i>Dermatophagoides pteronyssinus</i> | 6956        | Der p 1        | P08176       | 83754033  | 141      | TESAYLAYRNQSLDL  | 15   | 3324.0825  |
| <i>Dermatophagoides pteronyssinus</i> | 6956        | Der p 1        | P08176       | 83754033  | 176      | RGIEYQHNGVVQES   | 15   | 3324.0831  |
| <i>Dermatophagoides pteronyssinus</i> | 6956        | Der p 1        | P08176       | 83754033  | 186      | VVQESYYRYVAREQS  | 15   | 3324.0833  |
| <i>Dermatophagoides pteronyssinus</i> | 6956        | Der p 1        | P08176       | 83754033  | 211      | ISNYCQIYPPNVNKI  | 15   | 3324.0837  |
| <i>Dermatophagoides pteronyssinus</i> | 6956        | Der p 1        | P08176       | 83754033  | 226      | REALAQTHSAIAVII  | 15   | 3324.0840  |
| <i>Dermatophagoides pteronyssinus</i> | 6956        | Der p 1        | P08176       | 83754033  | 231      | QTHSAIAVIIIGKDL  | 15   | 3324.0835  |
| <i>Dermatophagoides pteronyssinus</i> | 6956        | Der p 1        | P08176       | 83754033  | 296      | DNGYGYFAANIDLMM  | 15   | 3324.0827  |
| <i>Dermatophagoides pteronyssinus</i> | 6956        | Der p 1        | P08176       | 83754033  | 306      | IDLMMIEEYPYVVIL  | 15   | 3324.0843  |
| <i>Dermatophagoides pteronyssinus</i> | 6956        | Der p 10       | O18416       | 2440053   | 101      | RSEERLKIATAKLEE  | 15   | 3324.0845  |
| <i>Dermatophagoides pteronyssinus</i> | 6956        | Der p 10       | O18416       | 2440053   | 106      | LKIATAKLEEAQSQA  | 15   | 3324.0847  |
| <i>Dermatophagoides pteronyssinus</i> | 6956        | Der p 10       | O18416       | 2440053   | 191      | VELEELRLRVVGNLK  | 15   | 3324.0848  |
| <i>Dermatophagoides pteronyssinus</i> | 6956        | Der p 10       | O18416       | 2440053   | 221      | HEQQIRIMTTKLKEA  | 15   | 3324.0846  |
| <i>Dermatophagoides pteronyssinus</i> | 6956        | Der p 11       | Q6Y2F9       | 37778944  | 61       | AELQIQVMSLSERLE  | 15   | 3324.0856  |
| <i>Dermatophagoides pteronyssinus</i> | 6956        | Der p 11       | Q6Y2F9       | 37778944  | 146      | QKFQAEVFELLSQLE  | 15   | 3324.0855  |
| <i>Dermatophagoides pteronyssinus</i> | 6956        | Der p 11       | Q6Y2F9       | 37778944  | 151      | EVFELLSQLENTANKE | 15   | 3324.0850  |
| <i>Dermatophagoides pteronyssinus</i> | 6956        | Der p 11       | Q6Y2F9       | 37778944  | 176      | LEYTVHELNIKIEEI  | 15   | 3324.0873  |
| <i>Dermatophagoides pteronyssinus</i> | 6956        | Der p 11       | Q6Y2F9       | 37778944  | 181      | HELNIKIEEINRTVI  | 15   | 3324.0869  |
| <i>Dermatophagoides pteronyssinus</i> | 6956        | Der p 11       | Q6Y2F9       | 37778944  | 216      | HEVKQLQLDNANHLKQ | 15   | 3324.0859  |
| <i>Dermatophagoides pteronyssinus</i> | 6956        | Der p 11       | Q6Y2F9       | 37778944  | 226      | NHLKQQLQALQLEDT  | 15   | 3324.0853  |
| <i>Dermatophagoides pteronyssinus</i> | 6956        | Der p 11       | Q6Y2F9       | 37778944  | 276      | EARLELERQLTKANG  | 15   | 3324.0866  |
| <i>Dermatophagoides pteronyssinus</i> | 6956        | Der p 11       | Q6Y2F9       | 37778944  | 311      | EELRRKMAQKISEYE  | 15   | 3324.0867  |
| <i>Dermatophagoides pteronyssinus</i> | 6956        | Der p 11       | Q6Y2F9       | 37778944  | 346      | QSEVEVLIMDLEKAA  | 15   | 3324.0874  |

**Supplemental Table 1. Complete list of peptides synthesized.**

| Organism                              | Taxonomy ID | Source protein | SwissProt ID | GI number | Position | Sequence          | Len. | Peptide ID |
|---------------------------------------|-------------|----------------|--------------|-----------|----------|-------------------|------|------------|
| <i>Dermatophagoides pteronyssinus</i> | 6956        | Der p 11       | Q6Y2F9       | 37778944  | 351      | VLIMDLEKAAAHAQQ   | 15   | 3324.0876  |
| <i>Dermatophagoides pteronyssinus</i> | 6956        | Der p 11       | Q6Y2F9       | 37778944  | 481      | KNQRLLIAELAQRVHD  | 15   | 3324.0851  |
| <i>Dermatophagoides pteronyssinus</i> | 6956        | Der p 11       | Q6Y2F9       | 37778944  | 506      | EIEALRKQYQIEIEQ   | 15   | 3324.0852  |
| <i>Dermatophagoides pteronyssinus</i> | 6956        | Der p 11       | Q6Y2F9       | 37778944  | 511      | RKQYQIEIEQLNMRLL  | 15   | 3324.0854  |
| <i>Dermatophagoides pteronyssinus</i> | 6956        | Der p 11       | Q6Y2F9       | 37778944  | 516      | IEIEQLNMRLLAEAEA  | 15   | 3324.0871  |
| <i>Dermatophagoides pteronyssinus</i> | 6956        | Der p 11       | Q6Y2F9       | 37778944  | 536      | IARLKKKYQAQITEL   | 15   | 3324.0870  |
| <i>Dermatophagoides pteronyssinus</i> | 6956        | Der p 11       | Q6Y2F9       | 37778944  | 541      | KKYQAQITELELSLD   | 15   | 3324.0860  |
| <i>Dermatophagoides pteronyssinus</i> | 6956        | Der p 11       | Q6Y2F9       | 37778944  | 566      | KTIKKQALQITELQA   | 15   | 3324.0872  |
| <i>Dermatophagoides pteronyssinus</i> | 6956        | Der p 11       | Q6Y2F9       | 37778944  | 611      | EEMRIALEQASRAKR   | 15   | 3324.0858  |
| <i>Dermatophagoides pteronyssinus</i> | 6956        | Der p 11       | Q6Y2F9       | 37778944  | 636      | VRVNELTTINVNLAS   | 15   | 3324.0864  |
| <i>Dermatophagoides pteronyssinus</i> | 6956        | Der p 11       | Q6Y2F9       | 37778944  | 641      | LTTINVNLASAKSKL   | 15   | 3324.0861  |
| <i>Dermatophagoides pteronyssinus</i> | 6956        | Der p 11       | Q6Y2F9       | 37778944  | 646      | VNLSAKSKLESEFS    | 15   | 3324.0877  |
| <i>Dermatophagoides pteronyssinus</i> | 6956        | Der p 11       | Q6Y2F9       | 37778944  | 651      | AKSKLESEFSALQAD   | 15   | 3324.0857  |
| <i>Dermatophagoides pteronyssinus</i> | 6956        | Der p 11       | Q6Y2F9       | 37778944  | 681      | QKLTIELKSTKDLLI   | 15   | 3324.0849  |
| <i>Dermatophagoides pteronyssinus</i> | 6956        | Der p 11       | Q6Y2F9       | 37778944  | 686      | ELKSTKDLLIEQER    | 15   | 3324.0868  |
| <i>Dermatophagoides pteronyssinus</i> | 6956        | Der p 11       | Q6Y2F9       | 37778944  | 701      | LVKLETVKKSLQEVE   | 15   | 3324.0862  |
| <i>Dermatophagoides pteronyssinus</i> | 6956        | Der p 11       | Q6Y2F9       | 37778944  | 716      | RTLHVRIEEVEANAL   | 15   | 3324.0875  |
| <i>Dermatophagoides pteronyssinus</i> | 6956        | Der p 11       | Q6Y2F9       | 37778944  | 731      | AGGKRVIAKLESRRIR  | 15   | 3324.0863  |
| <i>Dermatophagoides pteronyssinus</i> | 6956        | Der p 11       | Q6Y2F9       | 37778944  | 836      | DQAESNLSFIRAKHR   | 15   | 3324.0865  |
| <i>Dermatophagoides pteronyssinus</i> | 6956        | Der p 14       | Q8NoNo       | 20385544  | 31       | AQSTYVYVSLDAKTVL  | 15   | 3324.0886  |
| <i>Dermatophagoides pteronyssinus</i> | 6956        | Der p 14       | Q8NoNo       | 20385544  | 36       | VYSLDAKTVLTPRDS   | 15   | 3324.0936  |
| <i>Dermatophagoides pteronyssinus</i> | 6956        | Der p 14       | Q8NoNo       | 20385544  | 61       | VAFVSDCEAVLRLQN   | 15   | 3324.0923  |
| <i>Dermatophagoides pteronyssinus</i> | 6956        | Der p 14       | Q8NoNo       | 20385544  | 66       | DCEAVLRLQNVAIDG   | 15   | 3324.0912  |
| <i>Dermatophagoides pteronyssinus</i> | 6956        | Der p 14       | Q8NoNo       | 20385544  | 96       | FAFGYFNGRILGVCP   | 15   | 3324.0914  |
| <i>Dermatophagoides pteronyssinus</i> | 6956        | Der p 14       | Q8NoNo       | 20385544  | 116      | DWSLNVKKAIVSSLQ   | 15   | 3324.0888  |
| <i>Dermatophagoides pteronyssinus</i> | 6956        | Der p 14       | Q8NoNo       | 20385544  | 121      | VKKAIVSSLQALSQSDG | 15   | 3324.0880  |
| <i>Dermatophagoides pteronyssinus</i> | 6956        | Der p 14       | Q8NoNo       | 20385544  | 236      | KPVHMSYVKKMMLKQN  | 15   | 3324.0926  |
| <i>Dermatophagoides pteronyssinus</i> | 6956        | Der p 14       | Q8NoNo       | 20385544  | 286      | EVLKKLCEITEPEQA   | 15   | 3324.0913  |
| <i>Dermatophagoides pteronyssinus</i> | 6956        | Der p 14       | Q8NoNo       | 20385544  | 306      | FTFQKLVDKLRYLSA   | 15   | 3324.0915  |
| <i>Dermatophagoides pteronyssinus</i> | 6956        | Der p 14       | Q8NoNo       | 20385544  | 311      | LVDKLRYLSAEETAS   | 15   | 3324.0909  |
| <i>Dermatophagoides pteronyssinus</i> | 6956        | Der p 14       | Q8NoNo       | 20385544  | 341      | RLRELFLDASAFSAAS  | 15   | 3324.0879  |
| <i>Dermatophagoides pteronyssinus</i> | 6956        | Der p 14       | Q8NoNo       | 20385544  | 346      | FLDASAFASDGSIR    | 15   | 3324.0907  |
| <i>Dermatophagoides pteronyssinus</i> | 6956        | Der p 14       | Q8NoNo       | 20385544  | 371      | LSITRSTALFTVAAI   | 15   | 3324.0882  |
| <i>Dermatophagoides pteronyssinus</i> | 6956        | Der p 14       | Q8NoNo       | 20385544  | 376      | STALFTVAAIKAAPN   | 15   | 3324.0878  |
| <i>Dermatophagoides pteronyssinus</i> | 6956        | Der p 14       | Q8NoNo       | 20385544  | 391      | KETVQVLLPVIASEK   | 15   | 3324.0900  |
| <i>Dermatophagoides pteronyssinus</i> | 6956        | Der p 14       | Q8NoNo       | 20385544  | 406      | TIRPMLLGFSLVRRR   | 15   | 3324.0902  |
| <i>Dermatophagoides pteronyssinus</i> | 6956        | Der p 14       | Q8NoNo       | 20385544  | 436      | DARDAYLARLAVARD   | 15   | 3324.0904  |
| <i>Dermatophagoides pteronyssinus</i> | 6956        | Der p 14       | Q8NoNo       | 20385544  | 441      | YLARLAVARDASERM   | 15   | 3324.0897  |
| <i>Dermatophagoides pteronyssinus</i> | 6956        | Der p 14       | Q8NoNo       | 20385544  | 451      | ASERM TIVRALENLN  | 15   | 3324.0903  |
| <i>Dermatophagoides pteronyssinus</i> | 6956        | Der p 14       | Q8NoNo       | 20385544  | 456      | TIVRALENLN VNTD G | 15   | 3324.0933  |
| <i>Dermatophagoides pteronyssinus</i> | 6956        | Der p 14       | Q8NoNo       | 20385544  | 476      | NAMDEIHKSTDAEPA   | 15   | 3324.0918  |
| <i>Dermatophagoides pteronyssinus</i> | 6956        | Der p 14       | Q8NoNo       | 20385544  | 486      | DAEPAMRAAAVNALP   | 15   | 3324.0924  |
| <i>Dermatophagoides pteronyssinus</i> | 6956        | Der p 14       | Q8NoNo       | 20385544  | 536      | MSHIKDLFAVKGECM   | 15   | 3324.0917  |
| <i>Dermatophagoides pteronyssinus</i> | 6956        | Der p 14       | Q8NoNo       | 20385544  | 551      | KNYVLT YVDNLKSK   | 15   | 3324.0891  |
| <i>Dermatophagoides pteronyssinus</i> | 6956        | Der p 14       | Q8NoNo       | 20385544  | 631      | LKELVEFQVTQSGFD   | 15   | 3324.0883  |
| <i>Dermatophagoides pteronyssinus</i> | 6956        | Der p 14       | Q8NoNo       | 20385544  | 646      | RELNNAMSLLEKKS F  | 15   | 3324.0932  |
| <i>Dermatophagoides pteronyssinus</i> | 6956        | Der p 14       | Q8NoNo       | 20385544  | 651      | AMSLLEKKS FQSVMQ  | 15   | 3324.0911  |
| <i>Dermatophagoides pteronyssinus</i> | 6956        | Der p 14       | Q8NoNo       | 20385544  | 656      | EKKS FQSVMQFLRDM  | 15   | 3324.0905  |
| <i>Dermatophagoides pteronyssinus</i> | 6956        | Der p 14       | Q8NoNo       | 20385544  | 661      | QSVMQFLRDM LKMLS  | 15   | 3324.0895  |
| <i>Dermatophagoides pteronyssinus</i> | 6956        | Der p 14       | Q8NoNo       | 20385544  | 666      | FLRDM LKMLS QIRKN | 15   | 3324.0889  |
| <i>Dermatophagoides pteronyssinus</i> | 6956        | Der p 14       | Q8NoNo       | 20385544  | 671      | LKMLS QIRKN ADDNH | 15   | 3324.0927  |
| <i>Dermatophagoides pteronyssinus</i> | 6956        | Der p 14       | Q8NoNo       | 20385544  | 736      | LDSKLVLP TITGLPL  | 15   | 3324.0908  |
| <i>Dermatophagoides pteronyssinus</i> | 6956        | Der p 14       | Q8NoNo       | 20385544  | 746      | TGLPLMYKFGDNLVV   | 15   | 3324.0922  |
| <i>Dermatophagoides pteronyssinus</i> | 6956        | Der p 14       | Q8NoNo       | 20385544  | 811      | MIDMNVQKQEHSLLV   | 15   | 3324.0928  |
| <i>Dermatophagoides pteronyssinus</i> | 6956        | Der p 14       | Q8NoNo       | 20385544  | 816      | VQKQEHSLLVRFNMK   | 15   | 3324.0935  |
| <i>Dermatophagoides pteronyssinus</i> | 6956        | Der p 14       | Q8NoNo       | 20385544  | 836      | TVMRFKQSLREKRAT   | 15   | 3324.0920  |
| <i>Dermatophagoides pteronyssinus</i> | 6956        | Der p 14       | Q8NoNo       | 20385544  | 901      | KEVTALEMLKSETQ    | 15   | 3324.0901  |
| <i>Dermatophagoides pteronyssinus</i> | 6956        | Der p 14       | Q8NoNo       | 20385544  | 916      | DKTRRYLAEMTAVGS   | 15   | 3324.0921  |
| <i>Dermatophagoides pteronyssinus</i> | 6956        | Der p 14       | Q8NoNo       | 20385544  | 971      | NLKMHM DLPNVLQAD  | 15   | 3324.0929  |
| <i>Dermatophagoides pteronyssinus</i> | 6956        | Der p 14       | Q8NoNo       | 20385544  | 996      | NNVRKNRLNLQYKFA   | 15   | 3324.0930  |
| <i>Dermatophagoides pteronyssinus</i> | 6956        | Der p 14       | Q8NoNo       | 20385544  | 1021     | ENEFLFNLRKSSKEK   | 15   | 3324.0925  |
| <i>Dermatophagoides pteronyssinus</i> | 6956        | Der p 14       | Q8NoNo       | 20385544  | 1041     | YRAKYMSSHFPILNH   | 15   | 3324.0910  |
| <i>Dermatophagoides pteronyssinus</i> | 6956        | Der p 14       | Q8NoNo       | 20385544  | 1051     | PILNHKVN VQFKYRP  | 15   | 3324.0919  |
| <i>Dermatophagoides pteronyssinus</i> | 6956        | Der p 14       | Q8NoNo       | 20385544  | 1061     | FKYRPFKVN NLELG   | 15   | 3324.0906  |
| <i>Dermatophagoides pteronyssinus</i> | 6956        | Der p 14       | Q8NoNo       | 20385544  | 1081     | LQHKFR LMRNSQMEV  | 15   | 3324.0892  |
| <i>Dermatophagoides pteronyssinus</i> | 6956        | Der p 14       | Q8NoNo       | 20385544  | 1211     | DKKIFITHKTEMTKP   | 15   | 3324.0887  |
| <i>Dermatophagoides pteronyssinus</i> | 6956        | Der p 14       | Q8NoNo       | 20385544  | 1271     | LFYENYLTVHKGKGL   | 15   | 3324.0885  |
| <i>Dermatophagoides pteronyssinus</i> | 6956        | Der p 14       | Q8NoNo       | 20385544  | 1291     | RNDRKILLDLDNALS   | 15   | 3324.0896  |
| <i>Dermatophagoides pteronyssinus</i> | 6956        | Der p 14       | Q8NoNo       | 20385544  | 1296     | ILLDLDNALSPREGT   | 15   | 3324.0890  |

**Supplemental Table 1. Complete list of peptides synthesized.**

| Organism                              | Taxonomy ID | Source protein | SwissProt ID | GI number | Position | Sequence         | Len. | Peptide ID |
|---------------------------------------|-------------|----------------|--------------|-----------|----------|------------------|------|------------|
| <i>Dermatophagoides pteronyssinus</i> | 6956        | Der p 14       | Q8NoNo       | 20385544  | 1346     | NGKLHLSLIDPSTLS  | 15   | 3324.0894  |
| <i>Dermatophagoides pteronyssinus</i> | 6956        | Der p 14       | Q8NoNo       | 20385544  | 1351     | LSLIDPSTLSLVTKA  | 15   | 3324.0893  |
| <i>Dermatophagoides pteronyssinus</i> | 6956        | Der p 14       | Q8NoNo       | 20385544  | 1511     | GKLEGVLSRKVPSHL  | 15   | 3324.0916  |
| <i>Dermatophagoides pteronyssinus</i> | 6956        | Der p 14       | Q8NoNo       | 20385544  | 1516     | VLSRKVPSHLLTLETP | 15   | 3324.0934  |
| <i>Dermatophagoides pteronyssinus</i> | 6956        | Der p 14       | Q8NoNo       | 20385544  | 1566     | PGVQYKIINGNGKIKD | 15   | 3324.0931  |
| <i>Dermatophagoides pteronyssinus</i> | 6956        | Der p 14       | Q8NoNo       | 20385544  | 1636     | FDPHRAYYINWISSI  | 15   | 3324.0899  |
| <i>Dermatophagoides pteronyssinus</i> | 6956        | Der p 14       | Q8NoNo       | 20385544  | 1641     | AYYINWISSIRKYIQ  | 15   | 3324.0898  |
| <i>Dermatophagoides pteronyssinus</i> | 6956        | Der p 14       | Q8NoNo       | 20385544  | 1646     | WISSIRKYIQNFIVE  | 15   | 3324.0884  |
| <i>Dermatophagoides pteronyssinus</i> | 6956        | Der p 14       | Q8NoNo       | 20385544  | 1648     | SSIRKYIQNFIVEDH  | 15   | 3324.0881  |
| <i>Dermatophagoides pteronyssinus</i> | 6956        | Der p 2        | P49278       | 21465916  | 1        | MMYKILCLSLVAAV   | 15   | 3324.0937  |
| <i>Dermatophagoides pteronyssinus</i> | 6956        | Der p 2        | P49278       | 21465916  | 6        | LCLSLVAAVARDQV   | 15   | 3324.0938  |
| <i>Dermatophagoides pteronyssinus</i> | 6956        | Der p 2        | P49278       | 21465916  | 46       | IHRGKPFQLEAVFEA  | 15   | 3324.0939  |
| <i>Dermatophagoides pteronyssinus</i> | 6956        | Der p 2        | P49278       | 21465916  | 51       | PFQLEAVFEANQNTK  | 15   | 3324.0941  |
| <i>Dermatophagoides pteronyssinus</i> | 6956        | Der p 2        | P49278       | 21465916  | 101      | QQYDIKYTNVNPQIA  | 15   | 3324.0940  |
| <i>Dermatophagoides pteronyssinus</i> | 6956        | Der p 20       | DERP20SEQ    | 188485735 | 26       | LLKKYLTRDVFQDLK  | 15   | 3324.0943  |
| <i>Dermatophagoides pteronyssinus</i> | 6956        | Der p 20       | DERP20SEQ    | 188485735 | 31       | LTRDVFQDLKKNKTD  | 15   | 3324.0944  |
| <i>Dermatophagoides pteronyssinus</i> | 6956        | Der p 20       | DERP20SEQ    | 188485735 | 71       | DAQSYKTFAALFDPI  | 15   | 3324.0942  |
| <i>Dermatophagoides pteronyssinus</i> | 6956        | Der p 20       | DERP20SEQ    | 188485735 | 76       | KTFAALFDPIIDDYH  | 15   | 3324.0945  |
| <i>Dermatophagoides pteronyssinus</i> | 6956        | Der p 20       | DERP20SEQ    | 188485735 | 131      | LNGYFPNPMLEAQY   | 15   | 3324.0946  |
| <i>Dermatophagoides pteronyssinus</i> | 6956        | Der p 21       | Q2L7C5       | 85687540  | 1        | MKFIITLFAAIVMAA  | 15   | 3324.0947  |
| <i>Dermatophagoides pteronyssinus</i> | 6956        | Der p 21       | Q2L7C5       | 85687540  | 6        | TLFAAIVMAAASVSGF | 15   | 3324.0949  |
| <i>Dermatophagoides pteronyssinus</i> | 6956        | Der p 21       | Q2L7C5       | 85687540  | 11       | IVMAAASVGFIVGDK  | 15   | 3324.0951  |
| <i>Dermatophagoides pteronyssinus</i> | 6956        | Der p 21       | Q2L7C5       | 85687540  | 26       | KEDEWRMAFDRLMME  | 15   | 3324.0954  |
| <i>Dermatophagoides pteronyssinus</i> | 6956        | Der p 21       | Q2L7C5       | 85687540  | 31       | RMAFDRLMMEELETK  | 15   | 3324.0956  |
| <i>Dermatophagoides pteronyssinus</i> | 6956        | Der p 21       | Q2L7C5       | 85687540  | 51       | KGLLHLSEQYKLEK   | 15   | 3324.0955  |
| <i>Dermatophagoides pteronyssinus</i> | 6956        | Der p 21       | Q2L7C5       | 85687540  | 86       | MKGALKFFEMEAKRT  | 15   | 3324.0950  |
| <i>Dermatophagoides pteronyssinus</i> | 6956        | Der p 21       | Q2L7C5       | 85687540  | 106      | ERYNYEFALESIKLL  | 15   | 3324.0948  |
| <i>Dermatophagoides pteronyssinus</i> | 6956        | Der p 21       | Q2L7C5       | 85687540  | 111      | EFALESIKLLIKLD   | 15   | 3324.0952  |
| <i>Dermatophagoides pteronyssinus</i> | 6956        | Der p 21       | Q2L7C5       | 85687540  | 116      | SIKLLIKKLDLAKK   | 15   | 3324.0953  |
| <i>Dermatophagoides pteronyssinus</i> | 6956        | Der p 3        | P39675       | 729315    | 1        | MIYINLIVLLLAIN   | 15   | 3324.0957  |
| <i>Dermatophagoides pteronyssinus</i> | 6956        | Der p 3        | P39675       | 729315    | 6        | ILIVLLLAINLANP   | 15   | 3324.0958  |
| <i>Dermatophagoides pteronyssinus</i> | 6956        | Der p 3        | P39675       | 729315    | 11       | LLAINLANPILPAS   | 15   | 3324.0962  |
| <i>Dermatophagoides pteronyssinus</i> | 6956        | Der p 3        | P39675       | 729315    | 16       | TLANPILPASP NATI | 15   | 3324.0969  |
| <i>Dermatophagoides pteronyssinus</i> | 6956        | Der p 3        | P39675       | 729315    | 41       | CPYQISLQSSSHFCG  | 15   | 3324.0961  |
| <i>Dermatophagoides pteronyssinus</i> | 6956        | Der p 3        | P39675       | 729315    | 56       | GTILDEYWILTAACH  | 15   | 3324.0959  |
| <i>Dermatophagoides pteronyssinus</i> | 6956        | Der p 3        | P39675       | 729315    | 61       | EYWILTAACHVAGQT  | 15   | 3324.0966  |
| <i>Dermatophagoides pteronyssinus</i> | 6956        | Der p 3        | P39675       | 729315    | 76       | ASKLSIRYNSLKHSL  | 15   | 3324.0963  |
| <i>Dermatophagoides pteronyssinus</i> | 6956        | Der p 3        | P39675       | 729315    | 81       | IRYNSLKHSLGGEKI  | 15   | 3324.0968  |
| <i>Dermatophagoides pteronyssinus</i> | 6956        | Der p 3        | P39675       | 729315    | 91       | GGEKISVAKIFAHEK  | 15   | 3324.0964  |
| <i>Dermatophagoides pteronyssinus</i> | 6956        | Der p 3        | P39675       | 729315    | 111      | IDNDIALIKLKSPMK  | 15   | 3324.0967  |
| <i>Dermatophagoides pteronyssinus</i> | 6956        | Der p 3        | P39675       | 729315    | 116      | ALIKLKSPMKLNQKN  | 15   | 3324.0965  |
| <i>Dermatophagoides pteronyssinus</i> | 6956        | Der p 3        | P39675       | 729315    | 166      | SELRRVDIAVVRKE   | 15   | 3324.0960  |
| <i>Dermatophagoides pteronyssinus</i> | 6956        | Der p 4        | Q9Y197       | 5059162   | 1        | KYHNPHFIGNRSVIT  | 15   | 3324.0983  |
| <i>Dermatophagoides pteronyssinus</i> | 6956        | Der p 4        | Q9Y197       | 5059162   | 6        | HFIGNRSVITHLMEW  | 15   | 3324.0982  |
| <i>Dermatophagoides pteronyssinus</i> | 6956        | Der p 4        | Q9Y197       | 5059162   | 86       | NKAGVRIYVDIVLNH  | 15   | 3324.0981  |
| <i>Dermatophagoides pteronyssinus</i> | 6956        | Der p 4        | Q9Y197       | 5059162   | 91       | RIYVDIVLNHMTGAQ  | 15   | 3324.0988  |
| <i>Dermatophagoides pteronyssinus</i> | 6956        | Der p 4        | Q9Y197       | 5059162   | 96       | IVLNHMTGAQSGKGT  | 15   | 3324.0987  |
| <i>Dermatophagoides pteronyssinus</i> | 6956        | Der p 4        | Q9Y197       | 5059162   | 176      | QVDFLNHLIDIGVAG  | 15   | 3324.0984  |
| <i>Dermatophagoides pteronyssinus</i> | 6956        | Der p 4        | Q9Y197       | 5059162   | 201      | PDDLRSIYSLHLNHLN | 15   | 3324.0979  |
| <i>Dermatophagoides pteronyssinus</i> | 6956        | Der p 4        | Q9Y197       | 5059162   | 206      | SIYSLHLNHLNKEFFP | 15   | 3324.0989  |
| <i>Dermatophagoides pteronyssinus</i> | 6956        | Der p 4        | Q9Y197       | 5059162   | 221      | ENSPPIFYHETIYYG  | 15   | 3324.0990  |
| <i>Dermatophagoides pteronyssinus</i> | 6956        | Der p 4        | Q9Y197       | 5059162   | 251      | IEFRFYKEITNVFRG  | 15   | 3324.0976  |
| <i>Dermatophagoides pteronyssinus</i> | 6956        | Der p 4        | Q9Y197       | 5059162   | 286      | DALVMIDSHDLRVGH  | 15   | 3324.0992  |
| <i>Dermatophagoides pteronyssinus</i> | 6956        | Der p 4        | Q9Y197       | 5059162   | 311      | FEGRLKKAATAFMLA  | 15   | 3324.0973  |
| <i>Dermatophagoides pteronyssinus</i> | 6956        | Der p 4        | Q9Y197       | 5059162   | 316      | LKAATAFMLAWNYGV  | 15   | 3324.0972  |
| <i>Dermatophagoides pteronyssinus</i> | 6956        | Der p 4        | Q9Y197       | 5059162   | 321      | AFMLAWNYGVPRVMS  | 15   | 3324.0977  |
| <i>Dermatophagoides pteronyssinus</i> | 6956        | Der p 4        | Q9Y197       | 5059162   | 331      | PRVMSYFWNQIHKD   | 15   | 3324.0991  |
| <i>Dermatophagoides pteronyssinus</i> | 6956        | Der p 4        | Q9Y197       | 5059162   | 381      | EHRWREIYNMVKFRM  | 15   | 3324.0986  |
| <i>Dermatophagoides pteronyssinus</i> | 6956        | Der p 4        | Q9Y197       | 5059162   | 386      | EIYNMVKFRMIAGQE  | 15   | 3324.0978  |
| <i>Dermatophagoides pteronyssinus</i> | 6956        | Der p 4        | Q9Y197       | 5059162   | 391      | VKFRMIAGQEPVHNW  | 15   | 3324.0993  |
| <i>Dermatophagoides pteronyssinus</i> | 6956        | Der p 4        | Q9Y197       | 5059162   | 411      | YQIAFSRGNRAFIAI  | 15   | 3324.0980  |
| <i>Dermatophagoides pteronyssinus</i> | 6956        | Der p 4        | Q9Y197       | 5059162   | 416      | SRGNRAFIAINLKQN  | 15   | 3324.0974  |
| <i>Dermatophagoides pteronyssinus</i> | 6956        | Der p 4        | Q9Y197       | 5059162   | 421      | AFIAINLQKNQNLQ   | 15   | 3324.0985  |
| <i>Dermatophagoides pteronyssinus</i> | 6956        | Der p 4        | Q9Y197       | 5059162   | 476      | YVGHDFDAFVAYHI   | 15   | 3324.0975  |
| <i>Dermatophagoides pteronyssinus</i> | 6956        | Der p 4        | Q9Y197       | 5059162   | 481      | EFDADFVAYHIGARIV | 15   | 3324.0970  |
| <i>Dermatophagoides pteronyssinus</i> | 6956        | Der p 4        | Q9Y197       | 5059162   | 482      | FDAFVAYHIGARIVS  | 15   | 3324.0971  |
| <i>Dermatophagoides pteronyssinus</i> | 6956        | Der p 5        | P14004V      | 1352238   | 6        | KDPKPLKKSIMKFI   | 15   | 3324.0999  |
| <i>Dermatophagoides pteronyssinus</i> | 6956        | Der p 5        | P14004V      | 1352238   | 11       | LKKISIMKFIIAFFV  | 15   | 3324.0996  |
| <i>Dermatophagoides pteronyssinus</i> | 6956        | Der p 5        | P14004V      | 1352238   | 16       | IMKFIIAFFVATLAV  | 15   | 3324.0994  |

**Supplemental Table 1. Complete list of peptides synthesized.**

| Organism                              | Taxonomy ID | Source protein | SwissProt ID | GI number | Position | Sequence         | Len. | Peptide ID |
|---------------------------------------|-------------|----------------|--------------|-----------|----------|------------------|------|------------|
| <i>Dermatophagoides pteronyssinus</i> | 6956        | Der p 5        | P14004V      | 1352238   | 21       | IAFFVATLAVMTVSG  | 15   | 3324.0995  |
| <i>Dermatophagoides pteronyssinus</i> | 6956        | Der p 5        | P14004V      | 1352238   | 46       | FDLLMERIHEQIKK   | 15   | 3324.0998  |
| <i>Dermatophagoides pteronyssinus</i> | 6956        | Der p 5        | P14004V      | 1352238   | 61       | GELALFYLQEQINHF  | 15   | 3324.0997  |
| <i>Dermatophagoides pteronyssinus</i> | 6956        | Der p 5        | P14004V      | 1352238   | 66       | FYLQEQINHFEEKPT  | 15   | 3324.1000  |
| <i>Dermatophagoides pteronyssinus</i> | 6956        | Der p 5        | P14004V      | 1352238   | 106      | DRLMQRKDLDFEQT   | 15   | 3324.1002  |
| <i>Dermatophagoides pteronyssinus</i> | 6956        | Der p 5        | P14004V      | 1352238   | 111      | RKDLDFEQYNLEMA   | 15   | 3324.1001  |
| <i>Dermatophagoides pteronyssinus</i> | 6956        | Der p 6        | P49277(IUIS) | 1352239   | 1        | MIKIITTHIITVV    | 15   | 3324.1003  |
| <i>Dermatophagoides pteronyssinus</i> | 6956        | Der p 6        | P49277(IUIS) | 1352239   | 6        | TTIILITVVVDCRF   | 15   | 3324.1004  |
| <i>Dermatophagoides pteronyssinus</i> | 6956        | Der p 6        | P49277(IUIS) | 1352239   | 26       | PKWSYLDLSPASSSM  | 15   | 3324.1005  |
| <i>Dermatophagoides pteronyssinus</i> | 6956        | Der p 6        | P49277(IUIS) | 1352239   | 36       | ASSMMNDNSSPIAG   | 15   | 3327.0027  |
| <i>Dermatophagoides pteronyssinus</i> | 6956        | Der p 7        | P49273       | 292659601 | 1        | MMKLLLIAAAAFVAV  | 15   | 3324.1006  |
| <i>Dermatophagoides pteronyssinus</i> | 6956        | Der p 7        | P49273       | 292659601 | 6        | LIAAAAFVAVSADPI  | 15   | 3324.1007  |
| <i>Dermatophagoides pteronyssinus</i> | 6956        | Der p 7        | P49273       | 292659601 | 11       | AFVAVSADPIHYDKI  | 15   | 3324.1012  |
| <i>Dermatophagoides pteronyssinus</i> | 6956        | Der p 7        | P49273       | 292659601 | 111      | VVSMEYDLAYLKGDL  | 15   | 3324.1015  |
| <i>Dermatophagoides pteronyssinus</i> | 6956        | Der p 7        | P49273       | 292659601 | 131      | VISDIQDFVVELSLE  | 15   | 3324.1019  |
| <i>Dermatophagoides pteronyssinus</i> | 6956        | Der p 7        | P49273       | 292659601 | 136      | QDFVVELSLEVSEEG  | 15   | 3324.1009  |
| <i>Dermatophagoides pteronyssinus</i> | 6956        | Der p 7        | P49273       | 292659601 | 151      | NMTLTSFEVRQFANV  | 15   | 3324.1014  |
| <i>Dermatophagoides pteronyssinus</i> | 6956        | Der p 7        | P49273       | 292659601 | 156      | SFEVRQFANVVNHIG  | 15   | 3324.1010  |
| <i>Dermatophagoides pteronyssinus</i> | 6956        | Der p 7        | P49273       | 292659601 | 161      | QFANVVNHIGLSIL   | 15   | 3324.1016  |
| <i>Dermatophagoides pteronyssinus</i> | 6956        | Der p 7        | P49273       | 292659601 | 166      | VNHIGLSILDPIFA   | 15   | 3324.1013  |
| <i>Dermatophagoides pteronyssinus</i> | 6956        | Der p 7        | P49273       | 292659601 | 171      | GLSILDPIFAVLSDV  | 15   | 3324.1011  |
| <i>Dermatophagoides pteronyssinus</i> | 6956        | Der p 7        | P49273       | 292659601 | 176      | DPIFAVLSDVLTAF   | 15   | 3324.1008  |
| <i>Dermatophagoides pteronyssinus</i> | 6956        | Der p 7        | P49273       | 292659601 | 186      | LTAIFQDTRVRAEMTK | 15   | 3324.1018  |
| <i>Dermatophagoides pteronyssinus</i> | 6956        | Der p 7        | P49273       | 292659601 | 196      | AEMTKVLAPAFKKEL  | 15   | 3324.1017  |
| <i>Dermatophagoides pteronyssinus</i> | 6956        | Der p 8        | P46419       | 1170095   | 16       | QPIRLLLTYSGVDFV  | 15   | 3324.1025  |
| <i>Dermatophagoides pteronyssinus</i> | 6956        | Der p 8        | P46419       | 1170095   | 46       | EWLNEKFNGLDFPN   | 15   | 3324.1029  |
| <i>Dermatophagoides pteronyssinus</i> | 6956        | Der p 8        | P46419       | 1170095   | 66       | DGDMKMTQTFAILRY  | 15   | 3324.1027  |
| <i>Dermatophagoides pteronyssinus</i> | 6956        | Der p 8        | P46419       | 1170095   | 71       | MTQTFAILRYLGRKY  | 15   | 3324.1022  |
| <i>Dermatophagoides pteronyssinus</i> | 6956        | Der p 8        | P46419       | 1170095   | 136      | LKLMKSFVGEHAFIA  | 15   | 3324.1023  |
| <i>Dermatophagoides pteronyssinus</i> | 6956        | Der p 8        | P46419       | 1170095   | 141      | KFVGEHAFIAGANIS  | 15   | 3324.1021  |
| <i>Dermatophagoides pteronyssinus</i> | 6956        | Der p 8        | P46419       | 1170095   | 146      | HAFIAGANISYVDFN  | 15   | 3324.1020  |
| <i>Dermatophagoides pteronyssinus</i> | 6956        | Der p 8        | P46419       | 1170095   | 156      | YVDFNLYEYLCHVKV  | 15   | 3324.1026  |
| <i>Dermatophagoides pteronyssinus</i> | 6956        | Der p 8        | P46419       | 1170095   | 171      | MVPEVFGQFENLKRY  | 15   | 3324.1024  |
| <i>Dermatophagoides pteronyssinus</i> | 6956        | Der p 8        | P46419       | 1170095   | 181      | NLKRYVERMESLPRV  | 15   | 3324.1028  |
| <i>Dermatophagoides pteronyssinus</i> | 6956        | Der p 9        | Q7Z163       | 31745576  | 1        | MKFMILFALIAIGTS  | 15   | 3324.1030  |
| <i>Dermatophagoides pteronyssinus</i> | 6956        | Der p 9        | Q7Z163       | 31745576  | 6        | LFALIAIGTSVAIGE  | 15   | 3324.1038  |
| <i>Dermatophagoides pteronyssinus</i> | 6956        | Der p 9        | Q7Z163       | 31745576  | 31       | ITEKFPWMINEPLND  | 15   | 3324.1034  |
| <i>Dermatophagoides pteronyssinus</i> | 6956        | Der p 9        | Q7Z163       | 31745576  | 56       | ASPGDAVYQIALFRK  | 15   | 3324.1041  |
| <i>Dermatophagoides pteronyssinus</i> | 6956        | Der p 9        | Q7Z163       | 31745576  | 61       | AVYQIALFRKDSFTC  | 15   | 3324.1044  |
| <i>Dermatophagoides pteronyssinus</i> | 6956        | Der p 9        | Q7Z163       | 31745576  | 76       | GGSLISSRTVLTAAH  | 15   | 3324.1042  |
| <i>Dermatophagoides pteronyssinus</i> | 6956        | Der p 9        | Q7Z163       | 31745576  | 96       | EATPSYFKIRYNTLD  | 15   | 3324.1031  |
| <i>Dermatophagoides pteronyssinus</i> | 6956        | Der p 9        | Q7Z163       | 31745576  | 101      | YFKIRYNTLDRTNGP  | 15   | 3324.1032  |
| <i>Dermatophagoides pteronyssinus</i> | 6956        | Der p 9        | Q7Z163       | 31745576  | 121      | KIYRHNLYSSPIDY   | 15   | 3324.1045  |
| <i>Dermatophagoides pteronyssinus</i> | 6956        | Der p 9        | Q7Z163       | 31745576  | 131      | SPIDYDVATLILSQP  | 15   | 3324.1033  |
| <i>Dermatophagoides pteronyssinus</i> | 6956        | Der p 9        | Q7Z163       | 31745576  | 136      | DVATLILSQPFTPSA  | 15   | 3324.1037  |
| <i>Dermatophagoides pteronyssinus</i> | 6956        | Der p 9        | Q7Z163       | 31745576  | 181      | TLPTILQIASVTKMS  | 15   | 3324.1036  |
| <i>Dermatophagoides pteronyssinus</i> | 6956        | Der p 9        | Q7Z163       | 31745576  | 201      | STWGSVNAITNMLC   | 15   | 3324.1035  |
| <i>Dermatophagoides pteronyssinus</i> | 6956        | Der p 9        | Q7Z163       | 31745576  | 251      | STKYPTIYSNVANLR  | 15   | 3324.1039  |
| <i>Dermatophagoides pteronyssinus</i> | 6956        | Der p 9        | Q7Z163       | 31745576  | 256      | TIYSNVANLRNWIIS  | 15   | 3324.1040  |
| <i>Dermatophagoides pteronyssinus</i> | 6956        | Der p 9        | Q7Z163       | 31745576  | 259      | SNVANLRNWIISNTV  | 15   | 3324.1043  |
| Dog epithelia                         | 9615        | Can f 1        | O18873       | 29292148  | 1        | MKTLLLTIGFSLIAI  | 15   | 3324.0474  |
| Dog epithelia                         | 9615        | Can f 1        | O18873       | 29292148  | 6        | LTIGFSLIAILQAQD  | 15   | 3324.0473  |
| Dog epithelia                         | 9615        | Can f 1        | O18873       | 29292148  | 11       | SLIAILQAQDTPALG  | 15   | 3324.0475  |
| Dog epithelia                         | 9615        | Can f 1        | O18873       | 29292148  | 31       | VSGKWYLKAMTADQE  | 15   | 3324.0478  |
| Dog epithelia                         | 9615        | Can f 1        | O18873       | 29292148  | 36       | YLKAMTADQEVPEKP  | 15   | 3324.0480  |
| Dog epithelia                         | 9615        | Can f 1        | O18873       | 29292148  | 91       | PGKYTAYEQRVVFI   | 15   | 3324.0479  |
| Dog epithelia                         | 9615        | Can f 1        | O18873       | 29292148  | 96       | AYEGQRVVFIQPSPV  | 15   | 3324.0476  |
| Dog epithelia                         | 9615        | Can f 1        | O18873       | 29292148  | 101      | RVVFIQPSPVRDHYI  | 15   | 3324.0477  |
| Dog epithelia                         | 9615        | Can f 2        | O18874       | 3121746   | 1        | MQLLLTVGLALICG   | 15   | 3324.0482  |
| Dog epithelia                         | 9615        | Can f 2        | O18874       | 3121746   | 36       | RWHSVALASNKSDLI  | 15   | 3324.0484  |
| Dog epithelia                         | 9615        | Can f 2        | O18874       | 3121746   | 51       | KPWGHFRVFIHMSMA  | 15   | 3324.0483  |
| Dog epithelia                         | 9615        | Can f 2        | O18874       | 3121746   | 56       | FRVFIHMSMAKDGNL  | 15   | 3324.0485  |
| Dog epithelia                         | 9615        | Can f 2        | O18874       | 3121746   | 81       | QCEKVSMTAFKTATS  | 15   | 3324.0486  |
| Dog epithelia                         | 9615        | Can f 2        | O18874       | 3121746   | 86       | SLTAFKTATSNKFDL  | 15   | 3324.0489  |
| Dog epithelia                         | 9615        | Can f 2        | O18874       | 3121746   | 116      | KSYLILYMINQYND   | 15   | 3324.0481  |
| Dog epithelia                         | 9615        | Can f 2        | O18874       | 3121746   | 121      | LYMINQYNDTSLVA   | 15   | 3324.0488  |
| Dog epithelia                         | 9615        | Can f 2        | O18874       | 3121746   | 131      | TSLVAHLMVRDLRSRQ | 15   | 3324.0487  |
| Dog epithelia                         | 9615        | Can f 3        | P49822       | 56757408  | 1        | MKWVTFISLFFLFSS  | 15   | 3324.0490  |
| Dog epithelia                         | 9615        | Can f 3        | P49822       | 56757408  | 6        | FISLFFLFSSAYSRRG | 15   | 3324.0491  |



**Supplemental Table 1. Complete list of peptides synthesized.**

| Organism                | Taxonomy ID | Source protein | SwissProt ID | GI number | Position | Sequence         | Len. | Peptide ID |
|-------------------------|-------------|----------------|--------------|-----------|----------|------------------|------|------------|
| Mugwort                 | 4220        | Art v 2        | A6GVD5       | 148887203 | 1        | MGHLGNFWLVLAIISF | 15   | 3324.0109  |
| Mugwort                 | 4220        | Art v 2        | A6GVD5       | 148887203 | 6        | NFWLVLAIISFAILHL | 15   | 3324.0107  |
| Mugwort                 | 4220        | Art v 2        | A6GVD5       | 148887203 | 11       | LAIISFAILHLSHAHE | 15   | 3324.0108  |
| Mugwort                 | 4220        | Art v 2        | A6GVD5       | 148887203 | 86       | AQGAINGSMVAQLWL  | 15   | 3324.0111  |
| Mugwort                 | 4220        | Art v 2        | A6GVD5       | 148887203 | 121      | TQIVWANSERVCGCR  | 15   | 3337.0011  |
| Mugwort                 | 4220        | Art v 2        | A6GVD5       | 148887203 | 141      | GWAYIIVCNYDPPGN  | 15   | 3324.0110  |
| Mugwort                 | 4220        | Art v 3        | C4MGH1       | 189544590 | 1        | MAIKMMKVFCIMVVC  | 15   | 3324.0112  |
| Mugwort                 | 4220        | Art v 3        | C4MGH1       | 189544590 | 6        | MKVFCIMVVCMVVST  | 15   | 3324.0116  |
| Mugwort                 | 4220        | Art v 3        | C4MGH1       | 189544590 | 11       | IMVVCMVVSTSYAES  | 15   | 3324.0114  |
| Mugwort                 | 4220        | Art v 3        | C4MGH1       | 189544590 | 16       | MVVSTSYAESALTCS  | 15   | 3324.0117  |
| Mugwort                 | 4220        | Art v 3        | C4MGH1       | 189544590 | 76       | CLKASFKNKDLKSD   | 15   | 3337.0012  |
| Mugwort                 | 4220        | Art v 3        | C4MGH1       | 189544590 | 81       | FKSNKDLKSDFAVPL  | 15   | 3324.0115  |
| Mugwort                 | 4220        | Art v 3        | C4MGH1       | 189544590 | 86       | DLKSDFAVPLPSKCG  | 15   | 3324.0113  |
| Mugwort                 | 4220        | Art v 4        | Q8H2C8       | 73621416  | 16       | EGTGQHLTAAAILGL  | 15   | 3324.0119  |
| Mugwort                 | 4220        | Art v 4        | Q8H2C8       | 73621416  | 51       | GIINEFNVEVGTLAPT | 15   | 3337.0013  |
| Mugwort                 | 4220        | Art v 4        | Q8H2C8       | 73621416  | 66       | GLFLGGAKYMLVQGE  | 15   | 3324.0120  |
| Mugwort                 | 4220        | Art v 4        | Q8H2C8       | 73621416  | 71       | GAKYMLVQGEAGAVI  | 15   | 3324.0118  |
| Orchard grass           | 4509        | Dac g 1        | Q7XAX7       | 18093991  | 6        | SSVLLVVALFAVFLG  | 15   | 3324.0653  |
| Orchard grass           | 4509        | Dac g 1        | Q7XAX7       | 18093991  | 11       | VVALFAVFLGSAHGI  | 15   | 3324.0654  |
| Orchard grass           | 4509        | Dac g 1        | Q7XAX7       | 18093991  | 121      | EEPIAPYHFDLSGHA  | 15   | 3324.0656  |
| Orchard grass           | 4509        | Dac g 1        | Q7XAX7       | 18093991  | 181      | PNYLALLVKYVDGDG  | 15   | 3324.0655  |
| Orchard grass           | 4509        | Dac g 1        | Q7XAX7       | 18093991  | 211      | IALKESWGAIWRVDT  | 15   | 3337.0022  |
| Orchard grass           | 4509        | Dac g 2        | Q41183       | 255657    | 11       | GSDEKNLALSIIKYNK | 15   | 3324.0657  |
| Orchard grass           | 4509        | Dac g 2        | Q41183       | 255657    | 16       | NLALSIIKYNKEGDSM | 15   | 3324.0658  |
| Orchard grass           | 4509        | Dac g 2        | Q41183       | 255657    | 21       | IKYNKEGDSMAEVEL  | 15   | 3337.0023  |
| Orchard grass           | 4509        | Dac g 3        | P93124       | 14423759  | 51       | LWEVKSSKPLTGPFN  | 15   | 3337.0024  |
| Orchard grass           | 4509        | Dac g 3        | P93124       | 14423759  | 76       | NVFDEVIPATAFKIGT | 15   | 3324.0659  |
| Orchard grass           | 4509        | Dac g 3        | P93124       | 14423759  | 82       | IPTAFKIGTTTYTPEE | 15   | 3324.0660  |
| Orchard grass           | 4509        | Dac g 4        | P82946       | 32363463  | 1        | DIYNYMEPYVSKVDP  | 15   | 3324.0663  |
| Orchard grass           | 4509        | Dac g 4        | P82946       | 32363463  | 26       | TAWVDSGAQLGELSY  | 15   | 3337.0025  |
| Orchard grass           | 4509        | Dac g 4        | P82946       | 32363463  | 36       | GELSYGVLFNIQYVN  | 15   | 3324.0662  |
| Orchard grass           | 4509        | Dac g 4        | P82946       | 32363463  | 41       | GVLFNIQYVNYWFAP  | 15   | 3324.0661  |
| Penicillium chrysogenum | 5076        | Pen ch 13      | Q9URR2       | 6684758   | 1        | MGFLKVLATSLATLA  | 15   | 3324.1295  |
| Penicillium chrysogenum | 5076        | Pen ch 13      | Q9URR2       | 6684758   | 6        | VLATSLATLAVVDAG  | 15   | 3324.1300  |
| Penicillium chrysogenum | 5076        | Pen ch 13      | Q9URR2       | 6684758   | 26       | SNTDAVIPSSYIVVM  | 15   | 3324.1309  |
| Penicillium chrysogenum | 5076        | Pen ch 13      | Q9URR2       | 6684758   | 31       | VIPSSYIVVMNDVDS  | 15   | 3324.1310  |
| Penicillium chrysogenum | 5076        | Pen ch 13      | Q9URR2       | 6684758   | 36       | YIVVMNDDVSTAEFS  | 15   | 3324.1311  |
| Penicillium chrysogenum | 5076        | Pen ch 13      | Q9URR2       | 6684758   | 101      | PAVKYIEPDMIVNAT  | 15   | 3324.1304  |
| Penicillium chrysogenum | 5076        | Pen ch 13      | Q9URR2       | 6684758   | 106      | IEPDMIVNATANVVQ  | 15   | 3324.1298  |
| Penicillium chrysogenum | 5076        | Pen ch 13      | Q9URR2       | 6684758   | 111      | IVNATANVQSNVPS   | 15   | 3324.1306  |
| Penicillium chrysogenum | 5076        | Pen ch 13      | Q9URR2       | 6684758   | 126      | WGLARISSKRTGTTS  | 15   | 3324.1312  |
| Penicillium chrysogenum | 5076        | Pen ch 13      | Q9URR2       | 6684758   | 201      | YGVAKKATLVAVKVL  | 15   | 3324.1305  |
| Penicillium chrysogenum | 5076        | Pen ch 13      | Q9URR2       | 6684758   | 206      | KATLVAVKVLGADGS  | 15   | 3324.1307  |
| Penicillium chrysogenum | 5076        | Pen ch 13      | Q9URR2       | 6684758   | 261      | NDAANVVKSGIFLS   | 15   | 3324.1308  |
| Penicillium chrysogenum | 5076        | Pen ch 13      | Q9URR2       | 6684758   | 266      | NVVKSGIFLSVAAGN  | 15   | 3324.1299  |
| Penicillium chrysogenum | 5076        | Pen ch 13      | Q9URR2       | 6684758   | 271      | GIFLSVAAGNEAENA  | 15   | 3324.1303  |
| Penicillium chrysogenum | 5076        | Pen ch 13      | Q9URR2       | 6684758   | 346      | APHVAGVAAYLMALE  | 15   | 3324.1296  |
| Penicillium chrysogenum | 5076        | Pen ch 13      | Q9URR2       | 6684758   | 351      | GVAAYLMALEGVSAG  | 15   | 3324.1297  |
| Penicillium chrysogenum | 5076        | Pen ch 13      | Q9URR2       | 6684758   | 366      | NACARIVQLATSSIS  | 15   | 3324.1301  |
| Penicillium chrysogenum | 5076        | Pen ch 13      | Q9URR2       | 6684758   | 371      | IVQLATSSISRAPSG  | 15   | 3324.1302  |
| Penicillium chrysogenum | 5076        | Pen ch 18      | Q9P8G3       | 7963902   | 1        | MKGFLSLTLLPLLVA  | 15   | 3324.1314  |
| Penicillium chrysogenum | 5076        | Pen ch 18      | Q9P8G3       | 7963902   | 6        | SLTLLPLLVAASPVA  | 15   | 3324.1315  |
| Penicillium chrysogenum | 5076        | Pen ch 18      | Q9P8G3       | 7963902   | 11       | PLLVAASPVAVNSIH  | 15   | 3324.1319  |
| Penicillium chrysogenum | 5076        | Pen ch 18      | Q9P8G3       | 7963902   | 26       | NDAAPILSMTSKDI   | 15   | 3324.1332  |
| Penicillium chrysogenum | 5076        | Pen ch 18      | Q9P8G3       | 7963902   | 81       | SLFGFDPEAFMGLKH  | 15   | 3324.1316  |
| Penicillium chrysogenum | 5076        | Pen ch 18      | Q9P8G3       | 7963902   | 91       | MGLKHTFFHIAGSLLG | 15   | 3324.1318  |
| Penicillium chrysogenum | 5076        | Pen ch 18      | Q9P8G3       | 7963902   | 96       | TFHIAGSLLYAGHF   | 15   | 3324.1323  |
| Penicillium chrysogenum | 5076        | Pen ch 18      | Q9P8G3       | 7963902   | 176      | VDAYVIDTGANVKHV  | 15   | 3324.1327  |
| Penicillium chrysogenum | 5076        | Pen ch 18      | Q9P8G3       | 7963902   | 226      | KFGVAKKANVYAVKV  | 15   | 3324.1330  |
| Penicillium chrysogenum | 5076        | Pen ch 18      | Q9P8G3       | 7963902   | 236      | YAVKVLRSNGSMTLS  | 15   | 3324.1320  |
| Penicillium chrysogenum | 5076        | Pen ch 18      | Q9P8G3       | 7963902   | 271      | DKKFKGSVANMSLGG  | 15   | 3324.1329  |
| Penicillium chrysogenum | 5076        | Pen ch 18      | Q9P8G3       | 7963902   | 291      | LDLAVNAAVDAGIHF  | 15   | 3324.1331  |
| Penicillium chrysogenum | 5076        | Pen ch 18      | Q9P8G3       | 7963902   | 301      | AGIHFAVAAGNDNAD  | 15   | 3324.1324  |
| Penicillium chrysogenum | 5076        | Pen ch 18      | Q9P8G3       | 7963902   | 351      | IFAPGLNILSTVWGS  | 15   | 3324.1325  |
| Penicillium chrysogenum | 5076        | Pen ch 18      | Q9P8G3       | 7963902   | 376      | SMASPHIAGLLAYYV  | 15   | 3324.1321  |
| Penicillium chrysogenum | 5076        | Pen ch 18      | Q9P8G3       | 7963902   | 381      | HIAGLLAYYVSLAPA  | 15   | 3324.1313  |
| Penicillium chrysogenum | 5076        | Pen ch 18      | Q9P8G3       | 7963902   | 406      | TPKQLKAALISVATE  | 15   | 3324.1317  |
| Penicillium chrysogenum | 5076        | Pen ch 18      | Q9P8G3       | 7963902   | 411      | KAALISVATEGTLTD  | 15   | 3324.1326  |
| Penicillium chrysogenum | 5076        | Pen ch 18      | Q9P8G3       | 7963902   | 466      | IGIIDSAAEKAFHKE  | 15   | 3324.1322  |

**Supplemental Table 1. Complete list of peptides synthesized.**

| Organism                | Taxonomy ID | Source protein | SwissProt ID | GI number | Position | Sequence         | Len. | Peptide ID |
|-------------------------|-------------|----------------|--------------|-----------|----------|------------------|------|------------|
| Penicillium chrysogenum | 5076        | Pen ch 18      | Q9P8G3       | 7963902   | 476      | AFHKELGAIYSEIKD  | 15   | 3324.1328  |
| Prickly juniper         | 69008       | Jun o 4        | O64943       | 5391446   | 46       | ELADILRSLGSDVGE  | 15   | 3324.1129  |
| Prickly juniper         | 69008       | Jun o 4        | O64943       | 5391446   | 76       | GYVSLQEFVDLNNKG  | 15   | 3324.1131  |
| Prickly juniper         | 69008       | Jun o 4        | O64943       | 5391446   | 146      | LISVEEFQTMMTSEM  | 15   | 3324.1130  |
| Russian thistle         | 151250      | Sal k 1 1      | Q17ST3       | 59895730  | 81       | EKVKIERLHPYITLY  | 15   | 3324.1599  |
| Russian thistle         | 151250      | Sal k 1 1      | Q17ST3       | 59895730  | 86       | ERLHPYITLYGIDPK  | 15   | 3324.1597  |
| Russian thistle         | 151250      | Sal k 1 1      | Q17ST3       | 59895730  | 101      | NRPTITFAGTAAEFG  | 15   | 3324.1595  |
| Russian thistle         | 151250      | Sal k 1 1      | Q17ST3       | 59895730  | 111      | AAEFGTVDSATLIVE  | 15   | 3324.1596  |
| Russian thistle         | 151250      | Sal k 1 1      | Q17ST3       | 59895730  | 126      | SDYFVGANLIVSNSA  | 15   | 3324.1594  |
| Russian thistle         | 151250      | Sal k 1 1      | Q17ST3       | 59895730  | 131      | GANLIVSNSAPRPDG  | 15   | 3324.1601  |
| Russian thistle         | 151250      | Sal k 1 1      | Q17ST3       | 59895730  | 191      | EGTVDFIFGEARSLY  | 15   | 3324.1590  |
| Russian thistle         | 151250      | Sal k 1 1      | Q17ST3       | 59895730  | 196      | FIFGEARSLYLNTEL  | 15   | 3324.1591  |
| Russian thistle         | 151250      | Sal k 1 1      | Q17ST3       | 59895730  | 251      | LGRAWFEEARVVFSY  | 15   | 3324.1592  |
| Russian thistle         | 151250      | Sal k 1 1      | Q17ST3       | 59895730  | 256      | FEAARVVFSYCNLSD  | 15   | 3324.1593  |
| Russian thistle         | 151250      | Sal k 1 1      | Q17ST3       | 59895730  | 316      | ADAKTFTSLEYIEAA  | 15   | 3324.1598  |
| Russian thistle         | 151250      | Sal k 1 1      | Q17ST3       | 59895730  | 321      | FTSLEYIEAAKWLLP  | 15   | 3324.1589  |
| Russian thistle         | 151250      | Sal k 1 1      | Q17ST3       | 59895730  | 325      | EYIEAAKWLLPPPKV  | 15   | 3324.1600  |
| Russian thistle         | 151250      | Sal k 1 2      | P83181       | 25090947  | 11       | RTIFFDAYLGTSYVI  | 15   | 3324.1602  |
| Russian thistle         | 151250      | Sal k 1 2      | P83181       | 25090947  | 16       | DAYLGTSYVIVIKEP  | 15   | 3324.1603  |
| Russian thistle         | 151250      | Sal k 1 2      | P83181       | 25090947  | 21       | TSYVIVIKEPAEEFT  | 15   | 3324.1604  |
| Russian thistle         | 151250      | Sal k 1_2      | P83181       | 25090947  | 28       | KEPAEEFTTISDAVK  | 15   | 3337.0045  |
| Russian thistle         | 151250      | Sal k 2        | Q8L5K9       | 22726221  | 56       | ISYRVYTLKEIEVGT  | 15   | 3324.1617  |
| Russian thistle         | 151250      | Sal k 2        | Q8L5K9       | 22726221  | 66       | IEVGTDFYSSSLKIG  | 15   | 3324.1616  |
| Russian thistle         | 151250      | Sal k 2        | Q8L5K9       | 22726221  | 86       | PVYRAMLQHTPVAIK  | 15   | 3324.1610  |
| Russian thistle         | 151250      | Sal k 2        | Q8L5K9       | 22726221  | 96       | PVAIKVLRPNVSQL   | 15   | 3324.1615  |
| Russian thistle         | 151250      | Sal k 2        | Q8L5K9       | 22726221  | 141      | LVYEYMENGSLEDRL  | 15   | 3324.1614  |
| Russian thistle         | 151250      | Sal k 2        | Q8L5K9       | 22726221  | 151      | LEDRLFRKNNSPIP   | 15   | 3324.1620  |
| Russian thistle         | 151250      | Sal k 2        | Q8L5K9       | 22726221  | 166      | WKLRFKIAAIAIAL   | 15   | 3324.1607  |
| Russian thistle         | 151250      | Sal k 2        | Q8L5K9       | 22726221  | 171      | KIAAEIAIALFLRL   | 15   | 3324.1606  |
| Russian thistle         | 151250      | Sal k 2        | Q8L5K9       | 22726221  | 176      | IAIALFLRDAKPEP   | 15   | 3324.1608  |
| Russian thistle         | 151250      | Sal k 2        | Q8L5K9       | 22726221  | 201      | ILLDGNYSKIADV    | 15   | 3324.1612  |
| Russian thistle         | 151250      | Sal k 2        | Q8L5K9       | 22726221  | 211      | IADVGLARLVPPTVA  | 15   | 3324.1619  |
| Russian thistle         | 151250      | Sal k 2        | Q8L5K9       | 22726221  | 256      | KSDIYDFGILLQLL   | 15   | 3324.1605  |
| Russian thistle         | 151250      | Sal k 2        | Q8L5K9       | 22726221  | 261      | SFGIILLQLLTARPP  | 15   | 3324.1609  |
| Russian thistle         | 151250      | Sal k 2        | Q8L5K9       | 22726221  | 266      | LLQLLTARPPMALSY  | 15   | 3324.1613  |
| Russian thistle         | 151250      | Sal k 2        | Q8L5K9       | 22726221  | 301      | DWPVQEQALSALAL   | 15   | 3324.1611  |
| Russian thistle         | 151250      | Sal k 2        | Q8L5K9       | 22726221  | 306      | EALSALQALAKCEG   | 15   | 3324.1618  |
| Russian thistle         | 151250      | Sal k 3        | C1KEU0       | 225810599 | 51       | DAGIKYIPSNTFAYY  | 15   | 3324.1622  |
| Russian thistle         | 151250      | Sal k 3        | C1KEU0       | 225810599 | 56       | YIPSNTFAYYDQVLD  | 15   | 3324.1667  |
| Russian thistle         | 151250      | Sal k 3        | C1KEU0       | 225810599 | 86       | GGEIGFDLYFSMARG  | 15   | 3324.1642  |
| Russian thistle         | 151250      | Sal k 3        | C1KEU0       | 225810599 | 91       | FDLYFSMARGNASLP  | 15   | 3324.1653  |
| Russian thistle         | 151250      | Sal k 3        | C1KEU0       | 225810599 | 111      | KWFDTNHYHYVPELG  | 15   | 3324.1654  |
| Russian thistle         | 151250      | Sal k 3        | C1KEU0       | 225810599 | 126      | PEVKFAYSSHKAVDE  | 15   | 3324.1644  |
| Russian thistle         | 151250      | Sal k 3        | C1KEU0       | 225810599 | 136      | KAVDEYKEAKALGVD  | 15   | 3324.1662  |
| Russian thistle         | 151250      | Sal k 3        | C1KEU0       | 225810599 | 156      | VGPVSYLLLSKAAKG  | 15   | 3324.1651  |
| Russian thistle         | 151250      | Sal k 3        | C1KEU0       | 225810599 | 161      | YLLLSKAAKGVEKSF  | 15   | 3324.1659  |
| Russian thistle         | 151250      | Sal k 3        | C1KEU0       | 225810599 | 166      | KAAGKVEKSFLLSL   | 15   | 3324.1643  |
| Russian thistle         | 151250      | Sal k 3        | C1KEU0       | 225810599 | 171      | VEKSFLLSLLPKIL   | 15   | 3324.1631  |
| Russian thistle         | 151250      | Sal k 3        | C1KEU0       | 225810599 | 176      | PLLSLLPKILPVYKE  | 15   | 3324.1645  |
| Russian thistle         | 151250      | Sal k 3        | C1KEU0       | 225810599 | 186      | PVYKEVIAELKAAGA  | 15   | 3324.1634  |
| Russian thistle         | 151250      | Sal k 3        | C1KEU0       | 225810599 | 191      | VIAELKAAGASTIQF  | 15   | 3324.1632  |
| Russian thistle         | 151250      | Sal k 3        | C1KEU0       | 225810599 | 231      | STLSGLNVLVETYFA  | 15   | 3324.1664  |
| Russian thistle         | 151250      | Sal k 3        | C1KEU0       | 225810599 | 236      | LNVLVETYFADLTPE  | 15   | 3324.1655  |
| Russian thistle         | 151250      | Sal k 3        | C1KEU0       | 225810599 | 241      | ETYFADLTPEAYKTL  | 15   | 3324.1641  |
| Russian thistle         | 151250      | Sal k 3        | C1KEU0       | 225810599 | 251      | AYKTLVSLNGVTAFG  | 15   | 3324.1652  |
| Russian thistle         | 151250      | Sal k 3        | C1KEU0       | 225810599 | 261      | VTAFGFDLVRGTFKL  | 15   | 3324.1640  |
| Russian thistle         | 151250      | Sal k 3        | C1KEU0       | 225810599 | 281      | GFPSGKYLFAGVVDG  | 15   | 3324.1648  |
| Russian thistle         | 151250      | Sal k 3        | C1KEU0       | 225810599 | 296      | RNIWANDLAASLATAL | 15   | 3324.1638  |
| Russian thistle         | 151250      | Sal k 3        | C1KEU0       | 225810599 | 301      | NDLAASLATALQSLES | 15   | 3324.1628  |
| Russian thistle         | 151250      | Sal k 3        | C1KEU0       | 225810599 | 306      | SLATALQSLESIVGKD | 15   | 3324.1647  |
| Russian thistle         | 151250      | Sal k 3        | C1KEU0       | 225810599 | 341      | TKLDDEIKSWLAFAA  | 15   | 3324.1630  |
| Russian thistle         | 151250      | Sal k 3        | C1KEU0       | 225810599 | 346      | EIKSWLAFAAQKVLE  | 15   | 3324.1621  |
| Russian thistle         | 151250      | Sal k 3        | C1KEU0       | 225810599 | 351      | LAFAAQKVLEVNALA  | 15   | 3324.1623  |
| Russian thistle         | 151250      | Sal k 3        | C1KEU0       | 225810599 | 356      | QKVLEVNALAKALAG  | 15   | 3324.1657  |
| Russian thistle         | 151250      | Sal k 3        | C1KEU0       | 225810599 | 371      | QKDEAFFSANAAALA  | 15   | 3324.1624  |
| Russian thistle         | 151250      | Sal k 3        | C1KEU0       | 225810599 | 376      | FFSANAAALASRKSS  | 15   | 3324.1636  |
| Russian thistle         | 151250      | Sal k 3        | C1KEU0       | 225810599 | 461      | EYVVKAIKEEISKVV  | 15   | 3324.1627  |
| Russian thistle         | 151250      | Sal k 3        | C1KEU0       | 225810599 | 471      | ISKVVKLQEELDIDV  | 15   | 3324.1661  |
| Russian thistle         | 151250      | Sal k 3        | C1KEU0       | 225810599 | 496      | MVEYFGEQLSGFAFT  | 15   | 3324.1639  |

**Supplemental Table 1. Complete list of peptides synthesized.**

| Organism        | Taxonomy ID | Source protein | SwissProt ID | GI number | Position | Sequence         | Len. | Peptide ID |
|-----------------|-------------|----------------|--------------|-----------|----------|------------------|------|------------|
| Russian thistle | 151250      | Sal k 3        | C1KEUo       | 225810599 | 536      | KAMTVFWSSLAQSMT  | 15   | 3324.1633  |
| Russian thistle | 151250      | Sal k 3        | C1KEUo       | 225810599 | 551      | SRPMKGMMLTGPVTIL | 15   | 3324.1663  |
| Russian thistle | 151250      | Sal k 3        | C1KEUo       | 225810599 | 561      | PVTILNWSFVRNDQP  | 15   | 3324.1646  |
| Russian thistle | 151250      | Sal k 3        | C1KEUo       | 225810599 | 576      | RHETCYQIALAIEDE  | 15   | 3324.1629  |
| Russian thistle | 151250      | Sal k 3        | C1KEUo       | 225810599 | 596      | KAGINVIQIDEAALR  | 15   | 3324.1650  |
| Russian thistle | 151250      | Sal k 3        | C1KEUo       | 225810599 | 601      | VIQIDEAALREGLPL  | 15   | 3324.1665  |
| Russian thistle | 151250      | Sal k 3        | C1KEUo       | 225810599 | 621      | GFYLQWAVHSFRITN  | 15   | 3324.1625  |
| Russian thistle | 151250      | Sal k 3        | C1KEUo       | 225810599 | 626      | WAVHSFRITNVGIQD  | 15   | 3324.1635  |
| Russian thistle | 151250      | Sal k 3        | C1KEUo       | 225810599 | 651      | SNFNDIIHSIIDMDA  | 15   | 3324.1658  |
| Russian thistle | 151250      | Sal k 3        | C1KEUo       | 225810599 | 661      | IDMDADVITIENSRS  | 15   | 3324.1649  |
| Russian thistle | 151250      | Sal k 3        | C1KEUo       | 225810599 | 666      | DVITIENSRSDEKLL  | 15   | 3324.1660  |
| Russian thistle | 151250      | Sal k 3        | C1KEUo       | 225810599 | 711      | LADRIRKMLAVLESN  | 15   | 3324.1637  |
| Russian thistle | 151250      | Sal k 3        | C1KEUo       | 225810599 | 716      | RKMLAVLESNVLWVN  | 15   | 3324.1626  |
| Russian thistle | 151250      | Sal k 3        | C1KEUo       | 225810599 | 741      | NEVNPALSNMVYAAK  | 15   | 3324.1656  |
| Russian thistle | 151250      | Sal k 3        | C1KEUo       | 225810599 | 743      | VNPALSNMVYAAKPI  | 15   | 3324.1666  |
| Russian thistle | 151250      | Sal k 4        | C6JWHO       | 239916566 | 16       | EGTNNHLTAAAILGV  | 15   | 3324.1669  |
| Russian thistle | 151250      | Sal k 4        | C6JWHO       | 239916566 | 71       | GTKYMVIQGEAGQVI  | 15   | 3324.1668  |
| Russian thistle | 151250      | Sal k 4        | C6JWHO       | 239916566 | 101      | QALIFGIYDEPVTGP  | 15   | 3337.0046  |
| Rye grass       | 4522        | Lol p 1        | P14946       | 126385    | 1        | MASSSSVLLVVALFA  | 15   | 3324.1133  |
| Rye grass       | 4522        | Lol p 1        | P14946       | 126385    | 6        | SVLLVVALFAVFLGS  | 15   | 3324.1132  |
| Rye grass       | 4522        | Lol p 1        | P14946       | 126385    | 11       | VALFAVFLGSAHGIA  | 15   | 3324.1134  |
| Rye grass       | 4522        | Lol p 1        | P14946       | 126385    | 121      | EPIAPYHFDLSGHAF  | 15   | 3337.0028  |
| Rye grass       | 4522        | Lol p 1        | P14946       | 126385    | 176      | KASNPNYLAAILVKYV | 15   | 3324.1135  |
| Rye grass       | 4522        | Lol p 1        | P14946       | 126385    | 181      | NYLAILVKYVDGDGD  | 15   | 3324.1136  |
| Rye grass       | 4522        | Lol p 11       | Q7M1X5       | 47605808  | 106      | KQQGIRYANPIAFFR  | 15   | 3324.1137  |
| Rye grass       | 4522        | Lol p 11       | Q7M1X5       | 47605808  | 111      | RYANPIAFFRKEPLK  | 15   | 3324.1138  |
| Rye grass       | 4522        | Lol p 11       | Q7M1X5       | 47605808  | 116      | IAFFRKEPLKECGGI  | 15   | 3337.0029  |
| Rye grass       | 4522        | Lol p 2        | P14947       | 126386    | 51       | DGVWEIKSDKPLKGP  | 15   | 3324.1139  |
| Rye grass       | 4522        | Lol p 2        | P14947       | 126386    | 56       | IKSDKPLKGGPFNFRF | 15   | 3324.1140  |
| Rye grass       | 4522        | Lol p 2        | P14947       | 126386    | 76       | MRNVFDDVVPADFKV  | 15   | 3337.0030  |
| Rye grass       | 4522        | Lol p 3        | P14948       | 126387    | 11       | SDAKTLVLNLIKTRP  | 15   | 3324.1142  |
| Rye grass       | 4522        | Lol p 3        | P14948       | 126387    | 51       | LWEVKSAPLTPGPMN  | 15   | 3337.0031  |
| Rye grass       | 4522        | Lol p 3        | P14948       | 126387    | 76       | NVFDEVIPTAFTVGK  | 15   | 3324.1141  |
| Rye grass       | 4522        | Lol p 4        | Q5TIW3       | 55859464  | 21       | YEGLSYRSLQPENFA  | 15   | 3324.1161  |
| Rye grass       | 4522        | Lol p 4        | Q5TIW3       | 55859464  | 31       | PENFAVVDLNMRAV   | 15   | 3324.1159  |
| Rye grass       | 4522        | Lol p 4        | Q5TIW3       | 55859464  | 36       | VVDLNMRAVLVDGK   | 15   | 3324.1160  |
| Rye grass       | 4522        | Lol p 4        | Q5TIW3       | 55859464  | 61       | QLGELYYAISKYSRT  | 15   | 3324.1146  |
| Rye grass       | 4522        | Lol p 4        | Q5TIW3       | 55859464  | 66       | YYAISKYSRTLAFPA  | 15   | 3324.1147  |
| Rye grass       | 4522        | Lol p 4        | Q5TIW3       | 55859464  | 71       | KYSRTLAFPPAGVCPT | 15   | 3324.1164  |
| Rye grass       | 4522        | Lol p 4        | Q5TIW3       | 55859464  | 96       | GFGMLLRKYGIAAEN  | 15   | 3324.1157  |
| Rye grass       | 4522        | Lol p 4        | Q5TIW3       | 55859464  | 101      | LRKYGIAAENVIDVK  | 15   | 3324.1145  |
| Rye grass       | 4522        | Lol p 4        | Q5TIW3       | 55859464  | 141      | GGESFGIVVSWQVKL  | 15   | 3324.1153  |
| Rye grass       | 4522        | Lol p 4        | Q5TIW3       | 55859464  | 146      | GIVVSWQVKLLPVP   | 15   | 3324.1156  |
| Rye grass       | 4522        | Lol p 4        | Q5TIW3       | 55859464  | 176      | VDIINKWQLVAPQLP  | 15   | 3324.1143  |
| Rye grass       | 4522        | Lol p 4        | Q5TIW3       | 55859464  | 191      | ADLMIRIIMGPKAT   | 15   | 3324.1155  |
| Rye grass       | 4522        | Lol p 4        | Q5TIW3       | 55859464  | 236      | NEMSWIESIPFVHLG  | 15   | 3324.1151  |
| Rye grass       | 4522        | Lol p 4        | Q5TIW3       | 55859464  | 261      | NRNNTFKPFAEYKSD  | 15   | 3324.1158  |
| Rye grass       | 4522        | Lol p 4        | Q5TIW3       | 55859464  | 266      | FKPFAEYKSDYVYEP  | 15   | 3324.1148  |
| Rye grass       | 4522        | Lol p 4        | Q5TIW3       | 55859464  | 271      | EYKSDYVYEPFPPKSV | 15   | 3324.1162  |
| Rye grass       | 4522        | Lol p 4        | Q5TIW3       | 55859464  | 301      | IMIFDPYGATISATP  | 15   | 3324.1149  |
| Rye grass       | 4522        | Lol p 4        | Q5TIW3       | 55859464  | 321      | FPHRKGVLFNQYVN   | 15   | 3324.1152  |
| Rye grass       | 4522        | Lol p 4        | Q5TIW3       | 55859464  | 326      | GVLFNQYVNYWFAP   | 15   | 3324.1144  |
| Rye grass       | 4522        | Lol p 4        | Q5TIW3       | 55859464  | 331      | IQYVNYWFAPGAGAA  | 15   | 3324.1150  |
| Rye grass       | 4522        | Lol p 4        | Q5TIW3       | 55859464  | 351      | KEIYNYMEPYVSKNP  | 15   | 3324.1154  |
| Rye grass       | 4522        | Lol p 4        | Q5TIW3       | 55859464  | 396      | GQKYFKGNFERLAIT  | 15   | 3324.1163  |
| Rye grass       | 4522        | Lol p 5 1      | Q40237       | 2498582   | 1        | MAVQKHTVALFLAVA  | 15   | 3324.1172  |
| Rye grass       | 4522        | Lol p 5 1      | Q40237       | 2498582   | 6        | HTVALFLAVALVAGP  | 15   | 3324.1166  |
| Rye grass       | 4522        | Lol p 5 1      | Q40237       | 2498582   | 11       | FLAVALVAGPAASYA  | 15   | 3324.1170  |
| Rye grass       | 4522        | Lol p 5 1      | Q40237       | 2498582   | 71       | LIEKINAGFKA AVAA | 15   | 3324.1175  |
| Rye grass       | 4522        | Lol p 5 1      | Q40237       | 2498582   | 76       | NAGFKA AVAAAVVP  | 15   | 3324.1168  |
| Rye grass       | 4522        | Lol p 5 1      | Q40237       | 2498582   | 96       | KTFVETFGTATNKAF  | 15   | 3324.1171  |
| Rye grass       | 4522        | Lol p 5 1      | Q40237       | 2498582   | 106      | TNKAFVEGLASGYAD  | 15   | 3324.1186  |
| Rye grass       | 4522        | Lol p 5 1      | Q40237       | 2498582   | 126      | LTSKLDAAALKLAYEA | 15   | 3324.1187  |
| Rye grass       | 4522        | Lol p 5 1      | Q40237       | 2498582   | 131      | DAALKLAYEAAQCAT  | 15   | 3324.1169  |
| Rye grass       | 4522        | Lol p 5 1      | Q40237       | 2498582   | 146      | PEAKYDAYVATLTEA  | 15   | 3324.1180  |
| Rye grass       | 4522        | Lol p 5 1      | Q40237       | 2498582   | 151      | DAYVATLTEALRVIA  | 15   | 3324.1167  |
| Rye grass       | 4522        | Lol p 5 1      | Q40237       | 2498582   | 156      | TLTEALRVIA GTLEV | 15   | 3324.1185  |
| Rye grass       | 4522        | Lol p 5 1      | Q40237       | 2498582   | 196      | VDAAYRTAATAANAA  | 15   | 3324.1181  |
| Rye grass       | 4522        | Lol p 5 1      | Q40237       | 2498582   | 216      | FTVFENTFNNAIKVS  | 15   | 3324.1179  |

**Supplemental Table 1. Complete list of peptides synthesized.**

| Organism           | Taxonomy ID | Source protein | SwissProt ID | GI number | Position | Sequence          | Len. | Peptide ID |
|--------------------|-------------|----------------|--------------|-----------|----------|-------------------|------|------------|
| Rye grass          | 4522        | Lol p 5 1      | Q40237       | 2498582   | 221      | NTFNNAIKVSLGAAY   | 15   | 3324.1176  |
| Rye grass          | 4522        | Lol p 5 1      | Q40237       | 2498582   | 226      | AIKVSLSGAAAYDSYKF | 15   | 3324.1173  |
| Rye grass          | 4522        | Lol p 5 1      | Q40237       | 2498582   | 231      | LGAAYDSYKFIPTLV   | 15   | 3324.1174  |
| Rye grass          | 4522        | Lol p 5 1      | Q40237       | 2498582   | 236      | DSYKFIPTLVAAVKQ   | 15   | 3324.1165  |
| Rye grass          | 4522        | Lol p 5 1      | Q40237       | 2498582   | 241      | IPTLVAAVKQAYAAK   | 15   | 3324.1182  |
| Rye grass          | 4522        | Lol p 5 1      | Q40237       | 2498582   | 246      | AAVKQAYAAKQATAP   | 15   | 3324.1177  |
| Rye grass          | 4522        | Lol p 5 1      | Q40237       | 2498582   | 261      | EVKYTVSETALKKAV   | 15   | 3324.1178  |
| Rye grass          | 4522        | Lol p 5 1      | Q40237       | 2498582   | 271      | LKKAVTAMSEAEKEA   | 15   | 3324.1183  |
| Rye grass          | 4522        | Lol p 5 1      | Q40237       | 2498582   | 306      | PAAAYATATPAAATA   | 15   | 3324.1184  |
| Rye grass          | 4522        | Lol p 5 2      | Q40240       | 485371    | 1        | MAVQKYTVVALFLRRG  | 15   | 3324.1195  |
| Rye grass          | 4522        | Lol p 5 2      | Q40240       | 485371    | 141      | RSLRVIAGALEVHAV   | 15   | 3324.1190  |
| Rye grass          | 4522        | Lol p 5 2      | Q40240       | 485371    | 176      | DKIDAADFKAATAAN   | 15   | 3324.1192  |
| Rye grass          | 4522        | Lol p 5 2      | Q40240       | 485371    | 181      | AFKIAATAANAAPT    | 15   | 3324.1197  |
| Rye grass          | 4522        | Lol p 5 2      | Q40240       | 485371    | 196      | DKFTVFESAFNKALN   | 15   | 3324.1191  |
| Rye grass          | 4522        | Lol p 5 2      | Q40240       | 485371    | 241      | APEVKYAVFEAALTK   | 15   | 3324.1188  |
| Rye grass          | 4522        | Lol p 5 2      | Q40240       | 485371    | 246      | YAVFEAALTKAITAM   | 15   | 3324.1194  |
| Rye grass          | 4522        | Lol p 5 2      | Q40240       | 485371    | 251      | AALTKAITAMTQAQK   | 15   | 3324.1196  |
| Rye grass          | 4522        | Lol p 5 2      | Q40240       | 485371    | 291      | LPPPLLVVQSLISLL   | 15   | 3324.1193  |
| Rye grass          | 4522        | Lol p 5 2      | Q40240       | 485371    | 294      | PLLVVQSLISLLIYY   | 15   | 3324.1189  |
| Sweet vernal grass | 29661       | Ant o 1        | Q7M1X6       | 75139986  | 1        | IAKVPPGNITATYG    | 15   | 3324.0103  |
| Sweet vernal grass | 29661       | Ant o 1        | Q7M1X6       | 75139986  | 16       | DKWLDAKSTWYGKPT   | 15   | 3324.0102  |
| Sweet vernal grass | 29661       | Ant o 1        | Q7M1X6       | 75139986  | 18       | WLDKSTWYGKPTGA    | 15   | 3337.0008  |
| Western ragweed    | 29715       | Amb p 5        | P43174       | 1171001   | 1        | MNNEKNVSFEFIGST   | 15   | 3324.0097  |
| Western ragweed    | 29715       | Amb p 5        | P43174       | 1171001   | 6        | NVSFEFIGSTDEVDE   | 15   | 3324.0098  |
| Western ragweed    | 29715       | Amb p 5        | P43174       | 1171001   | 21       | IKLLPCAWAGNVCGE   | 15   | 3337.0004  |
| Western ragweed    | 29715       | Amb p 5        | P43174       | 1171001   | 63       | QKCGKMRMNVTKNTI   | 15   | 3337.0005  |
| White oak          | 3513        | Que a 1        | B6RQS2       | 167472849 | 11       | ASVIPPARLFKAFVL   | 15   | 3324.1587  |
| White oak          | 3513        | Que a 1        | B6RQS2       | 167472849 | 16       | PARLFKAFVLDSNDL   | 15   | 3324.1585  |
| White oak          | 3513        | Que a 1        | B6RQS2       | 167472849 | 21       | KAFVLDSNDLIPKVV   | 15   | 3324.1588  |
| White oak          | 3513        | Que a 1        | B6RQS2       | 167472849 | 141      | ASEVFKAVEAYLVAH   | 15   | 3324.1584  |
| White oak          | 3513        | Que a 1        | B6RQS2       | 167472849 | 146      | KAVEAYLVAHPLDYK   | 15   | 3324.1586  |

**Supplemental Table 2. Summary of responses to allergen extracts**

| Allergen              | Concentration<br>(µg/ml) | Donor              | Wheal<br>(mm) | Response to extract (SFC) |      |       | Evaluation | Summary |          |           |     |       |    |    |       |
|-----------------------|--------------------------|--------------------|---------------|---------------------------|------|-------|------------|---------|----------|-----------|-----|-------|----|----|-------|
|                       |                          |                    |               | IFNg                      | IL-5 | Total |            | Tested  | Positive | %Positive |     |       |    |    |       |
| Alder                 | 50                       | D00069             | 12            | 3407                      | 667  | 4073  | +          | 12      | 11       | 91.7      |     |       |    |    |       |
|                       |                          | U00110             | 10            | 220                       | 3    | 223   | +          |         |          |           |     |       |    |    |       |
|                       |                          | U00122             | 10            | 597                       | 1860 | 2457  | +          |         |          |           |     |       |    |    |       |
|                       |                          | U00047             | 10            | 70                        | 297  | 367   | +          |         |          |           |     |       |    |    |       |
|                       |                          | U00046             | 10            | 1323                      | 197  | 1520  | +          |         |          |           |     |       |    |    |       |
|                       |                          | U00050             | 10            | 987                       | 100  | 1087  | +          |         |          |           |     |       |    |    |       |
|                       |                          | U00054             | 10            | 1123                      | 830  | 1953  | +          |         |          |           |     |       |    |    |       |
|                       |                          | U00064             | 10            | 200                       | 30   | 230   | +          |         |          |           |     |       |    |    |       |
|                       |                          | U00075             | 3             | 227                       | 10   | 237   | +          |         |          |           |     |       |    |    |       |
|                       |                          | U00039             | 10            | 33                        | 0    | 33    | -          |         |          |           |     |       |    |    |       |
|                       |                          | U00032             | 10            | 997                       | 198  | 1194  | +          |         |          |           |     |       |    |    |       |
|                       |                          | U00115             | 10            | 1010                      | 0    | 1010  | +          |         |          |           |     |       |    |    |       |
| Alternaria rot fungus | 2                        | D00069             | 15            | 33                        | 2460 | 2493  | +          | 12      | 12       | 100.0     |     |       |    |    |       |
|                       |                          | U00119             | 3             | 953                       | 3370 | 4323  | +          |         |          |           |     |       |    |    |       |
|                       |                          | U00122             | 10            | 2573                      | 1310 | 3883  | +          |         |          |           |     |       |    |    |       |
|                       |                          | U00064             | 7             | 677                       | 2280 | 2957  | +          |         |          |           |     |       |    |    |       |
|                       |                          | U00102             | 7             | 1197                      | 1580 | 2777  | +          |         |          |           |     |       |    |    |       |
|                       |                          | D00095             | 9             | 1157                      | 2400 | 3557  | +          |         |          |           |     |       |    |    |       |
|                       |                          | U00032             | 8             | 173                       | 203  | 377   | +          |         |          |           |     |       |    |    |       |
|                       |                          | U00129             | 3             | 207                       | 3183 | 3390  | +          |         |          |           |     |       |    |    |       |
|                       |                          | D00003             | 8             | 1760                      | 2913 | 4673  | +          |         |          |           |     |       |    |    |       |
|                       |                          | U00075             | 8             | 540                       | 2460 | 3000  | +          |         |          |           |     |       |    |    |       |
|                       |                          | U00097             | 5             | 2827                      | 593  | 3420  | +          |         |          |           |     |       |    |    |       |
|                       |                          | D00107             | 14            | 43                        | 313  | 357   | +          |         |          |           |     |       |    |    |       |
|                       |                          | Ash                | 50            | D00069                    | 15   | 170   | 0          |         |          |           | 170 | +     | 14 | 11 | 78.6  |
|                       |                          |                    |               | U00089                    | 12   | 600   | 310        |         |          |           | 910 | +     |    |    |       |
| D00052                | 9                        |                    |               | 567                       | 143  | 710   | +          |         |          |           |     |       |    |    |       |
| U00058                | 3                        |                    |               | 0                         | 0    | 0     | -          |         |          |           |     |       |    |    |       |
| U00109                | 20                       |                    |               | 1860                      | 1180 | 3040  | +          |         |          |           |     |       |    |    |       |
| U00122                | 12                       |                    |               | 1473                      | 1180 | 2653  | +          |         |          |           |     |       |    |    |       |
| U00047                | 10                       |                    |               | 210                       | 887  | 1097  | +          |         |          |           |     |       |    |    |       |
| U00046                | 10                       |                    |               | 170                       | 0    | 170   | +          |         |          |           |     |       |    |    |       |
| U00102                | 3                        |                    |               | 7                         | 3    | 10    | -          |         |          |           |     |       |    |    |       |
| D00026                | 25                       |                    |               | 2177                      | 480  | 2657  | +          |         |          |           |     |       |    |    |       |
| U00115                | 10                       |                    |               | 107                       | 40   | 147   | -          |         |          |           |     |       |    |    |       |
| D00007                | 9                        |                    |               | 567                       | 33   | 600   | +          |         |          |           |     |       |    |    |       |
| D00047                | 20                       |                    |               | 1833                      | 2313 | 4147  | +          |         |          |           |     |       |    |    |       |
| D00027                | 12                       |                    |               | 763                       | 0    | 763   | +          |         |          |           |     |       |    |    |       |
| <i>A. fumigatus</i>   | 5                        |                    |               | U00109                    | 3    | 2853  | 217        | 3070    | +        | 11        | 11  | 100.0 |    |    |       |
|                       |                          |                    |               | U00122                    | 3    | 2610  | 2250       | 4860    | +        |           |     |       |    |    |       |
|                       |                          | D00045             | 8             | 1383                      | 47   | 1430  | +          |         |          |           |     |       |    |    |       |
|                       |                          | U00047             | 3             | 593                       | 30   | 623   | +          |         |          |           |     |       |    |    |       |
|                       |                          | U00050             | 3             | 1997                      | 530  | 2527  | +          |         |          |           |     |       |    |    |       |
|                       |                          | U00129             | 3             | 720                       | 600  | 1320  | +          |         |          |           |     |       |    |    |       |
|                       |                          | U00075             | 3             | 1407                      | 57   | 1463  | +          |         |          |           |     |       |    |    |       |
|                       |                          | U00085             | 3             | 1260                      | 57   | 1317  | +          |         |          |           |     |       |    |    |       |
|                       |                          | U00103             | 3             | 1250                      | 63   | 1313  | +          |         |          |           |     |       |    |    |       |
|                       |                          | U00113             | 3             | 3393                      | 10   | 3403  | +          |         |          |           |     |       |    |    |       |
|                       |                          | U00121             | 3             | 1500                      | 353  | 1853  | +          |         |          |           |     |       |    |    |       |
|                       |                          | American cockroach | 25            | U00109                    | 3    | 2853  | 217        | 3070    | +        |           |     |       | 11 | 11 | 100.0 |
| U00122                | 3                        |                    |               | 2610                      | 2250 | 4860  | +          |         |          |           |     |       |    |    |       |
| D00045                | 8                        |                    |               | 1383                      | 47   | 1430  | +          |         |          |           |     |       |    |    |       |
| U00047                | 3                        |                    |               | 593                       | 30   | 623   | +          |         |          |           |     |       |    |    |       |
| U00050                | 3                        |                    |               | 1997                      | 530  | 2527  | +          |         |          |           |     |       |    |    |       |
| U00129                | 3                        |                    |               | 720                       | 600  | 1320  | +          |         |          |           |     |       |    |    |       |
| U00075                | 3                        |                    |               | 1407                      | 57   | 1463  | +          |         |          |           |     |       |    |    |       |
| U00085                | 3                        |                    |               | 1260                      | 57   | 1317  | +          |         |          |           |     |       |    |    |       |
| U00103                | 3                        |                    |               | 1250                      | 63   | 1313  | +          |         |          |           |     |       |    |    |       |
| U00113                | 3                        |                    |               | 3393                      | 10   | 3403  | +          |         |          |           |     |       |    |    |       |
| U00121                | 3                        |                    |               | 1500                      | 353  | 1853  | +          |         |          |           |     |       |    |    |       |
| Bermuda grass         | 50                       | D00070             | 11            | 2010                      | 97   | 2107  | +          | 11      | 11       | 100.0     |     |       |    |    |       |
|                       |                          | U00089             | 15            | 2450                      | 510  | 2960  | +          |         |          |           |     |       |    |    |       |
|                       |                          | D00004             | 20            | 1833                      | 547  | 2380  | +          |         |          |           |     |       |    |    |       |
|                       |                          | D00039             | 17            | 2020                      | 507  | 2527  | +          |         |          |           |     |       |    |    |       |
|                       |                          | D00094             | 20            | 33                        | 2100 | 2133  | +          |         |          |           |     |       |    |    |       |
|                       |                          | D00102             | 13            | 213                       | 1073 | 1287  | +          |         |          |           |     |       |    |    |       |
|                       |                          | D00067             | 14            | 1580                      | 23   | 1603  | +          |         |          |           |     |       |    |    |       |
|                       |                          | U00054             | 10            | 1457                      | 0    | 1457  | +          |         |          |           |     |       |    |    |       |
|                       |                          | U00099             | 10            | 1380                      | 603  | 1983  | +          |         |          |           |     |       |    |    |       |
|                       |                          | D00042             | 17            | 973                       | 23   | 997   | +          |         |          |           |     |       |    |    |       |
|                       |                          | D00104             | 11            | 1620                      | 30   | 1650  | +          |         |          |           |     |       |    |    |       |
| Birch                 | 50                       | U00110             | 20            | 307                       | 207  | 513   | +          | 10      | 10       | 100.0     |     |       |    |    |       |

**Supplemental Table 2. Summary of responses to allergen extracts**

| Allergen                | Concentration<br>(µg/ml) | Donor  | Wheal<br>(mm) | Response to extract (SFC) |      |       | Evaluation | Summary |          |           |
|-------------------------|--------------------------|--------|---------------|---------------------------|------|-------|------------|---------|----------|-----------|
|                         |                          |        |               | IFNg                      | IL-5 | Total |            | Tested  | Positive | %Positive |
|                         |                          | U00047 | 10            | 380                       | 1840 | 2220  | +          |         |          |           |
|                         |                          | D00026 | 25            | 2603                      | 407  | 3010  | +          |         |          |           |
|                         |                          | U00115 | 10            | 617                       | 87   | 703   | +          |         |          |           |
|                         |                          | U00103 | 7             | 2547                      | 1190 | 3737  | +          |         |          |           |
|                         |                          | D00073 | 19            | 680                       | 33   | 713   | +          |         |          |           |
|                         |                          | D00067 | 16            | 2690                      | 387  | 3077  | +          |         |          |           |
|                         |                          | D00065 | 19            | 1083                      | 97   | 1180  | +          |         |          |           |
|                         |                          | D00094 | 15            | 350                       | 2710 | 3060  | +          |         |          |           |
|                         |                          | U00053 | 10            | 1580                      | 327  | 1907  | +          |         |          |           |
| Black walnut            | 50                       | U00110 | 10            | 1410                      | 1910 | 3320  | +          | 10      | 10       | 100.0     |
|                         |                          | U00080 | 5             | 2233                      | 2193 | 4427  | +          |         |          |           |
|                         |                          | D00094 | 17            | 793                       | 1557 | 2350  | +          |         |          |           |
|                         |                          | U00115 | 5             | 1810                      | 2183 | 3993  | +          |         |          |           |
|                         |                          | D00003 | 6             | 903                       | 843  | 1747  | +          |         |          |           |
|                         |                          | U00075 | 8             | 163                       | 2177 | 2340  | +          |         |          |           |
|                         |                          | U00092 | 5             | 2110                      | 967  | 3077  | +          |         |          |           |
|                         |                          | U00097 | 6             | 2670                      | 0    | 2670  | +          |         |          |           |
|                         |                          | U00072 |               | 0                         | 1463 | 1463  | +          |         |          |           |
|                         |                          | U00137 | 4             | 1330                      | 2197 | 3527  | +          |         |          |           |
| Canary grass            | 50                       | D00070 | 21            | 2770                      | 1183 | 3953  | +          | 10      | 10       | 100.0     |
|                         |                          | U00089 | 10            | 1813                      | 910  | 2723  | +          |         |          |           |
|                         |                          | U00110 | 20            | 163                       | 67   | 230   | +          |         |          |           |
|                         |                          | U00099 | 20            | 2267                      | 340  | 2607  | +          |         |          |           |
|                         |                          | U00106 | 18            | 677                       | 1297 | 1973  | +          |         |          |           |
|                         |                          | D00004 | 35            | 1253                      | 2520 | 3773  | +          |         |          |           |
|                         |                          | U00117 | 7             | 1573                      | 53   | 1627  | +          |         |          |           |
|                         |                          | D00052 | 17            | 1670                      | 1803 | 3473  | +          |         |          |           |
|                         |                          | U00036 | 20            | 787                       | 487  | 1273  | +          |         |          |           |
|                         |                          | U00029 | 20            | 421                       | 0    | 421   | +          |         |          |           |
| Cat epithelia           | 50                       | D00069 | 10            | 2037                      | 2353 | 4390  | +          | 11      | 11       | 100.0     |
|                         |                          | U00106 | 12            | 653                       | 2063 | 2717  | +          |         |          |           |
|                         |                          | D00004 | 8             | 785                       | 1005 | 1790  | +          |         |          |           |
|                         |                          | U00079 | 8             | 1177                      | 2100 | 3277  | +          |         |          |           |
|                         |                          | D00073 | 15            | 700                       | 1113 | 1813  | +          |         |          |           |
|                         |                          | U00047 | 15            | 307                       | 1933 | 2240  | +          |         |          |           |
|                         |                          | U00046 | 10            | 737                       | 2620 | 3357  | +          |         |          |           |
|                         |                          | U00029 | 25            | 1380                      | 1363 | 2743  | +          |         |          |           |
|                         |                          | U00128 | 10            | 2220                      | 2073 | 4293  | +          |         |          |           |
|                         |                          | U00126 | 8             | 440                       | 320  | 760   | +          |         |          |           |
|                         |                          | U00107 | 10            | 820                       | 407  | 1227  | +          |         |          |           |
| <i>C. herbarum</i>      | 5                        | U00079 | 3             | 1703                      | 3917 | 5620  | +          | 10      | 10       | 100.0     |
|                         |                          | U00110 | 3             | 640                       | 2040 | 2680  | +          |         |          |           |
|                         |                          | U00122 | 4             | 2060                      | 2640 | 4700  | +          |         |          |           |
|                         |                          | D00073 | 16            | 1297                      | 990  | 2287  | +          |         |          |           |
|                         |                          | U00083 | 8             | 2270                      | 53   | 2323  | +          |         |          |           |
|                         |                          | U00102 | 16            | 2207                      | 387  | 2593  | +          |         |          |           |
|                         |                          | U00101 | 3             | 1760                      | 1963 | 3723  | +          |         |          |           |
|                         |                          | U00128 | 3             | 2933                      | 0    | 2933  | +          |         |          |           |
|                         |                          | U00129 | 3             | 1397                      | 1287 | 2683  | +          |         |          |           |
|                         |                          | U00107 | 3             | 1213                      | 263  | 1477  | +          |         |          |           |
| Cypress                 | 50                       | D00052 | 5             | 977                       | 797  | 1773  | +          | 10      | 8        | 80.0      |
|                         |                          | U00110 | 3             | 97                        | 0    | 97    | -          |         |          |           |
|                         |                          | D00026 | 20            | 2207                      | 1653 | 3860  | +          |         |          |           |
|                         |                          | D00102 | 12            | 250                       | 1283 | 1533  | +          |         |          |           |
|                         |                          | U00092 | 3             | 937                       | 240  | 1177  | +          |         |          |           |
|                         |                          | D00008 | 9             | 30                        | 2297 | 2327  | +          |         |          |           |
|                         |                          | D00107 | 10            | 1223                      | 1473 | 2697  | +          |         |          |           |
|                         |                          | U00075 | 3             | 230                       | 1340 | 1570  | +          |         |          |           |
|                         |                          | U00125 | 3             | 43                        | 10   | 53    | -          |         |          |           |
|                         |                          | U00034 | 3             | 2827                      | 247  | 3073  | +          |         |          |           |
| <i>D. farinae</i>       | 50                       | D00069 | 16            | 1303                      | 30   | 1333  | +          | 10      | 9        | 90.0      |
|                         |                          | U00099 | 10            | 767                       | 270  | 1037  | +          |         |          |           |
|                         |                          | U00117 | 5             | 823                       | 237  | 1060  | +          |         |          |           |
|                         |                          | U00110 | 10            | 207                       | 0    | 207   | +          |         |          |           |
|                         |                          | U00093 | 8             | 817                       | 217  | 1033  | +          |         |          |           |
|                         |                          | U00112 | 8             | 343                       | 0    | 343   | +          |         |          |           |
|                         |                          | U00131 | 10            | 553                       | 0    | 553   | +          |         |          |           |
|                         |                          | U00102 | 3             | 130                       | 10   | 140   | -          |         |          |           |
|                         |                          | U00050 | 10            | 540                       | 240  | 780   | +          |         |          |           |
|                         |                          | U00124 | 8             | 907                       | 1640 | 2547  | +          |         |          |           |
| <i>D. pteronyssinus</i> | 50                       | U00117 | 6             | 2397                      | 2883 | 5280  | +          | 11      | 11       | 100.0     |
|                         |                          | U00093 | 10            | 1167                      | 0    | 1167  | +          |         |          |           |

**Supplemental Table 2. Summary of responses to allergen extracts**

| Allergen            | Concentration<br>(µg/ml) | Donor  | Wheal<br>(mm) | Response to extract (SFC) |      |       | Evaluation | Summary |          |           |
|---------------------|--------------------------|--------|---------------|---------------------------|------|-------|------------|---------|----------|-----------|
|                     |                          |        |               | IFNg                      | IL-5 | Total |            | Tested  | Positive | %Positive |
|                     |                          | U00112 | 8             | 217                       | 0    | 217   | +          |         |          |           |
|                     |                          | U00131 | 8             | 1283                      | 303  | 1587  | +          |         |          |           |
|                     |                          | D00002 | 15            | 663                       | 137  | 800   | +          |         |          |           |
|                     |                          | U00050 | 12            | 1580                      | 357  | 1937  | +          |         |          |           |
|                     |                          | U00102 | 5             | 267                       | 40   | 307   | +          |         |          |           |
|                     |                          | U00128 | 20            | 163                       | 330  | 493   | +          |         |          |           |
|                     |                          | U00023 | 10            | 860                       | 2173 | 3033  | +          |         |          |           |
|                     |                          | U00124 | 8             | 2323                      | 2100 | 4423  | +          |         |          |           |
|                     |                          | U00108 | 15            | 1343                      | 1917 | 3260  | +          |         |          |           |
| Dog epithelia       | 50                       | U00079 | 3             | 283                       | 47   | 330   | +          | 10      | 10       | 100.0     |
|                     |                          | U00117 | 3             | 1843                      | 223  | 2067  | +          |         |          |           |
|                     |                          | U00110 | 3             | 190                       | 33   | 223   | +          |         |          |           |
|                     |                          | U00108 | 3             | 1150                      | 400  | 1550  | +          |         |          |           |
|                     |                          | U00023 | 4             | 1460                      | 817  | 2277  | +          |         |          |           |
|                     |                          | U00069 | 5             | 453                       | 113  | 567   | +          |         |          |           |
|                     |                          | U00101 | 3             | 903                       | 703  | 1607  | +          |         |          |           |
|                     |                          | U00129 | 3             | 2110                      | 0    | 2110  | +          |         |          |           |
|                     |                          | D00107 | 10            | 297                       | 1447 | 1743  | +          |         |          |           |
|                     |                          | U00075 | 3             | 1453                      | 390  | 1843  | +          |         |          |           |
| English plantain    | 50                       | D00069 | 10            | 2547                      | 2513 | 5060  | +          | 10      | 8        | 80.0      |
|                     |                          | D00004 | 9             | 1650                      | 1230 | 2880  | +          |         |          |           |
|                     |                          | U00110 | 8             | 60                        | 13   | 73    | -          |         |          |           |
|                     |                          | D00073 | 21            | 240                       | 20   | 260   | +          |         |          |           |
|                     |                          | D00094 | 19            | 1167                      | 1650 | 2817  | +          |         |          |           |
|                     |                          | U00054 | 10            | 987                       | 743  | 1730  | +          |         |          |           |
|                     |                          | U00075 | 3             | 657                       | 530  | 1187  | +          |         |          |           |
|                     |                          | U00069 | 5             | 83                        | 50   | 133   | -          |         |          |           |
|                     |                          | U00102 | 8             | 380                       | 243  | 623   | +          |         |          |           |
|                     |                          | U00072 | 5             | 1467                      | 733  | 2200  | +          |         |          |           |
| Giant ragweed       | 50                       | D00002 | 13            | 1760                      | 120  | 1880  | +          | 10      | 10       | 100.0     |
|                     |                          | D00094 | 20            | 173                       | 793  | 967   | +          |         |          |           |
|                     |                          | U00047 | 10            | 647                       | 1297 | 1943  | +          |         |          |           |
|                     |                          | D00095 | 12            | 1407                      | 160  | 1567  | +          |         |          |           |
|                     |                          | D00007 | 8             | 1160                      | 43   | 1203  | +          |         |          |           |
|                     |                          | D00100 | 10            | 1060                      | 457  | 1517  | +          |         |          |           |
|                     |                          | D00045 | 14            | 1870                      | 130  | 2000  | +          |         |          |           |
|                     |                          | D00084 | 10            | 843                       | 1050 | 1893  | +          |         |          |           |
|                     |                          | D00096 | 13            | 287                       | 0    | 287   | +          |         |          |           |
|                     |                          | U00054 | 8             | 687                       | 17   | 703   | +          |         |          |           |
| Juniper             | 20                       | D00052 | 8             | 37                        | 0    | 37    | -          | 10      | 8        | 80.0      |
|                     |                          | D00060 | 9             | 1530                      | 2413 | 3943  | +          |         |          |           |
|                     |                          | U00032 | 10            | 153                       | 123  | 277   | +          |         |          |           |
|                     |                          | D00073 | 21            | 0                         | 0    | 0     | -          |         |          |           |
|                     |                          | U00099 | 8             | 190                       | 2147 | 2337  | +          |         |          |           |
|                     |                          | D00027 | 6             | 153                       | 687  | 840   | +          |         |          |           |
|                     |                          | D00068 | 15            | 540                       | 2717 | 3257  | +          |         |          |           |
|                     |                          | U00034 | 3             | 637                       | 1450 | 2087  | +          |         |          |           |
|                     |                          | D00084 | 13            | 183                       | 2227 | 2410  | +          |         |          |           |
|                     |                          | U00098 | 3             | 2023                      | 330  | 2353  | +          |         |          |           |
| Kentucky blue grass | 50                       | D00070 | 27            | 1543                      | 683  | 2227  | +          | 12      | 12       | 100.0     |
|                     |                          | U00089 | 12            | 2750                      | 2060 | 4810  | +          |         |          |           |
|                     |                          | U00106 | 10            | 2215                      | 2927 | 5142  | +          |         |          |           |
|                     |                          | D00004 | 22            | 2417                      | 1813 | 4230  | +          |         |          |           |
|                     |                          | U00036 | 10            | 1553                      | 2097 | 3650  | +          |         |          |           |
|                     |                          | U00102 | 20            | 773                       | 2290 | 3063  | +          |         |          |           |
|                     |                          | U00032 | 25            | 1730                      | 1813 | 3543  | +          |         |          |           |
|                     |                          | D00054 | 10            | 3133                      | 2353 | 5487  | +          |         |          |           |
|                     |                          | U00115 | 8             | 1490                      | 713  | 2203  | +          |         |          |           |
|                     |                          | U00101 | 8             | 1083                      | 2297 | 3380  | +          |         |          |           |
|                     |                          | U00110 | 20            | 800                       | 543  | 1343  | +          |         |          |           |
|                     |                          | U00034 | 10            | 423                       | 1837 | 2260  | +          |         |          |           |
| Mugwort             | 50                       | U00122 | 12            | 850                       | 523  | 1373  | +          | 10      | 10       | 100.0     |
|                     |                          | D00061 | 17            | 2283                      | 1503 | 3787  | +          |         |          |           |
|                     |                          | D00095 | 8             | 843                       | 423  | 1267  | +          |         |          |           |
|                     |                          | D00007 | 17            | 1887                      | 1277 | 3163  | +          |         |          |           |
|                     |                          | D00041 | 12            | 2670                      | 1603 | 4273  | +          |         |          |           |
|                     |                          | D00042 | 11            | 933                       | 230  | 1163  | +          |         |          |           |
|                     |                          | D00047 | 16            | 1213                      | 1273 | 2487  | +          |         |          |           |
|                     |                          | U00103 | 8             | 533                       | 53   | 587   | +          |         |          |           |
|                     |                          | U00118 | 6             | 2083                      | 1410 | 3493  | +          |         |          |           |
|                     |                          | D00104 | 17            | 160                       | 40   | 200   | +          |         |          |           |
| White Oak           | 25                       | D00069 | 13            | 483                       | 1873 | 2357  | +          | 12      | 8        | 66.7      |

**Supplemental Table 2. Summary of responses to allergen extracts**

| Allergen              | Concentration<br>(µg/ml) | Donor  | Wheal<br>(mm) | Response to extract (SFC) |      |       | Evaluation | Summary |          |           |
|-----------------------|--------------------------|--------|---------------|---------------------------|------|-------|------------|---------|----------|-----------|
|                       |                          |        |               | IFNg                      | IL-5 | Total |            | Tested  | Positive | %Positive |
|                       |                          | D00004 | 13            | 540                       | 587  | 1127  | +          |         |          |           |
|                       |                          | D00052 | 11            | 110                       | 10   | 120   | -          |         |          |           |
|                       |                          | D00026 | 21            | 760                       | 340  | 1100  | +          |         |          |           |
|                       |                          | D00078 | 15            | 153                       | 320  | 473   | +          |         |          |           |
|                       |                          | U00047 | 10            | 0                         | 2933 | 2933  | +          |         |          |           |
|                       |                          | U00103 | 8             | 40                        | 0    | 40    | -          |         |          |           |
|                       |                          | U00115 | 8             | 23                        | 0    | 23    | -          |         |          |           |
|                       |                          | D00094 | 19            | 23                        | 3583 | 3607  | +          |         |          |           |
|                       |                          | U00110 | 8             | 77                        | 47   | 123   | -          |         |          |           |
|                       |                          | U00072 | 5             | 1113                      | 1390 | 2503  | +          |         |          |           |
|                       |                          | D00067 | 11            | 1273                      | 1183 | 2457  | +          |         |          |           |
| Orchard grass         | 50                       | D00070 | 29            | 2107                      | 350  | 2457  | +          | 11      | 11       | 100.0     |
|                       |                          | U00089 | 5             | 2570                      | 2253 | 4823  | +          |         |          |           |
|                       |                          | U00110 | 20            | 357                       | 930  | 1287  | +          |         |          |           |
|                       |                          | U00099 | 10            | 37                        | 2433 | 2470  | +          |         |          |           |
|                       |                          | U00106 | 12            | 510                       | 463  | 973   | +          |         |          |           |
|                       |                          | D00004 | 25            | 1690                      | 2263 | 3953  | +          |         |          |           |
|                       |                          | U00036 | 10            | 1310                      | 280  | 1590  | +          |         |          |           |
|                       |                          | U00058 | 8             | 760                       | 687  | 1447  | +          |         |          |           |
|                       |                          | D00042 | 18            | 1260                      | 1160 | 2420  | +          |         |          |           |
|                       |                          | U00102 | 20            | 957                       | 1543 | 2500  | +          |         |          |           |
|                       |                          | U00101 | 12            | 1050                      | 1020 | 2070  | +          |         |          |           |
| Date Palm             | 50                       | D00069 | 9             | 1927                      | 2517 | 4443  | +          | 10      | 9        | 90.0      |
|                       |                          | U00075 | 3             | 873                       | 1347 | 2220  | +          |         |          |           |
|                       |                          | U00046 | 10            | 2437                      | 1597 | 4033  | +          |         |          |           |
|                       |                          | U00050 | 10            | 1040                      | 1863 | 2903  | +          |         |          |           |
|                       |                          | U00054 | 10            | 1010                      | 940  | 1950  | +          |         |          |           |
|                       |                          | D00045 | 24            | 2223                      | 110  | 2333  | +          |         |          |           |
|                       |                          | U00110 | 10            | 43                        | 20   | 63    | -          |         |          |           |
|                       |                          | U00036 | 8             | 1127                      | 23   | 1150  | +          |         |          |           |
|                       |                          | D00035 | 5             | 2223                      | 100  | 2323  | +          |         |          |           |
|                       |                          | D00084 | 13            | 1963                      | 33   | 1997  | +          |         |          |           |
| <i>P. chrysogenum</i> | 5                        | D00052 | 11            | 570                       | 890  | 1460  | +          | 10      | 10       | 100.0     |
|                       |                          | U00036 | 3             | 2363                      | 237  | 2600  | +          |         |          |           |
|                       |                          | U00109 | 3             | 837                       | 633  | 1470  | +          |         |          |           |
|                       |                          | U00122 | 3             | 3870                      | 2423 | 6293  | +          |         |          |           |
|                       |                          | U00050 | 3             | 460                       | 973  | 1433  | +          |         |          |           |
|                       |                          | U00047 | 3             | 1570                      | 263  | 1833  | +          |         |          |           |
|                       |                          | U00118 | 6             | 1710                      | 1363 | 3073  | +          |         |          |           |
|                       |                          | U00129 | 3             | 2183                      | 1330 | 3513  | +          |         |          |           |
|                       |                          | U00132 | 3             | 2167                      | 837  | 3003  | +          |         |          |           |
|                       |                          | U00137 | 3             | 1587                      | 377  | 1963  | +          |         |          |           |
| Russian thistle       | 50                       | U00089 | 12            | 1610                      | 1750 | 3360  | +          | 10      | 9        | 90.0      |
|                       |                          | D00060 | 11            | 2170                      | 1803 | 3973  | +          |         |          |           |
|                       |                          | U00106 | 10            | 2907                      | 2493 | 5400  | +          |         |          |           |
|                       |                          | U00109 | 20            | 1310                      | 3383 | 4693  | +          |         |          |           |
|                       |                          | U00047 | 10            | 220                       | 1153 | 1373  | +          |         |          |           |
|                       |                          | D00047 | 24            | 1720                      | 2623 | 4343  | +          |         |          |           |
|                       |                          | D00079 | 19            | 1480                      | 1280 | 2760  | +          |         |          |           |
|                       |                          | U00054 | 10            | 1490                      | 927  | 2417  | +          |         |          |           |
|                       |                          | U00110 | 10            | 13                        | 3    | 17    | -          |         |          |           |
|                       |                          | U00118 | 14            | 1563                      | 2823 | 4387  | +          |         |          |           |
| Rye grass             | 50                       | D00070 | 25            | 2580                      | 1523 | 4103  | +          | 11      | 11       | 100.0     |
|                       |                          | U00089 | 12            | 1153                      | 410  | 1563  | +          |         |          |           |
|                       |                          | U00110 | 18            | 183                       | 67   | 250   | +          |         |          |           |
|                       |                          | U00099 | 20            | 0                         | 2307 | 2307  | +          |         |          |           |
|                       |                          | U00106 | 15            | 618                       | 1786 | 2404  | +          |         |          |           |
|                       |                          | D00004 | 16            | 1107                      | 1607 | 2713  | +          |         |          |           |
|                       |                          | U00117 | 4             | 253                       | 87   | 340   | +          |         |          |           |
|                       |                          | U00036 | 10            | 363                       | 153  | 517   | +          |         |          |           |
|                       |                          | U00054 | 15            | 943                       | 403  | 1347  | +          |         |          |           |
|                       |                          | U00125 | 25            | 403                       | 1007 | 1410  | +          |         |          |           |
|                       |                          | D00041 | 15            | 2060                      | 423  | 2483  | +          |         |          |           |
| Sweet vernal grass    | 50                       | U00099 | 10            | 1943                      | 2960 | 4903  | +          | 15      | 14       | 93.3      |
|                       |                          | U00106 | 12            | 2443                      | 1570 | 4013  | +          |         |          |           |
|                       |                          | D00004 | 26            | 1907                      | 830  | 2737  | +          |         |          |           |
|                       |                          | U00079 | 7             | 30                        | 23   | 53    | -          |         |          |           |
|                       |                          | D00052 | 19            | 1543                      | 1673 | 3217  | +          |         |          |           |
|                       |                          | U00036 | 15            | 1313                      | 1177 | 2490  | +          |         |          |           |
|                       |                          | U00058 | 12            | 1087                      | 1143 | 2230  | +          |         |          |           |
|                       |                          | U00110 | 13            | 103                       | 110  | 213   | +          |         |          |           |
|                       |                          | U00102 | 10            | 143                       | 407  | 550   | +          |         |          |           |

**Supplemental Table 2. Summary of responses to allergen extracts**

| Allergen                                  | Concentration<br>(µg/ml) | Donor  | Wheal<br>(mm) | Response to extract (SFC) |      |       | Evaluation | Summary    |            |             |
|-------------------------------------------|--------------------------|--------|---------------|---------------------------|------|-------|------------|------------|------------|-------------|
|                                           |                          |        |               | IFNγ                      | IL-5 | Total |            | Tested     | Positive   | %Positive   |
|                                           |                          | U00050 | 10            | 1397                      | 860  | 2257  | +          |            |            |             |
|                                           |                          | U00054 | 15            | 273                       | 53   | 327   | +          |            |            |             |
|                                           |                          | U00016 | 10            | 2413                      | 1483 | 3897  | +          |            |            |             |
|                                           |                          | D00042 | 14            | 2090                      | 1943 | 4033  | +          |            |            |             |
|                                           |                          | U00101 | 12            | 1740                      | 63   | 1803  | +          |            |            |             |
|                                           |                          | U00075 | 20            | 1787                      | 753  | 2540  | +          |            |            |             |
| Western ragweed                           | 50                       | D00070 | 23            | 1820                      | 1950 | 3770  | +          | 10         | 10         | 100.0       |
|                                           |                          | D00094 | 24            | 83                        | 707  | 790   | +          |            |            |             |
|                                           |                          | D00007 | 11            | 1137                      | 493  | 1630  | +          |            |            |             |
|                                           |                          | D00079 | 19            | 320                       | 713  | 1033  | +          |            |            |             |
|                                           |                          | D00102 | 19            | 413                       | 1740 | 2153  | +          |            |            |             |
|                                           |                          | D00100 | 16            | 1690                      | 443  | 2133  | +          |            |            |             |
|                                           |                          | U00092 | 5             | 267                       | 2020 | 2287  | +          |            |            |             |
|                                           |                          | D00045 | 10            | 563                       | 380  | 943   | +          |            |            |             |
|                                           |                          | D00084 | 20            | 83                        | 80   | 163   | +          |            |            |             |
|                                           |                          | U00098 | 7             | 1707                      | 123  | 1830  | +          |            |            |             |
| <b>Total</b>                              |                          |        |               |                           |      |       |            | <b>304</b> | <b>286</b> | <b>94.1</b> |
| Criteria of positivity:<br>Total SFC ≥150 |                          |        |               |                           |      |       |            |            | Average:   | 94.3        |

Supplemental Table 3. Positive donor/peptide responses

| Category | Organism              | Antigen               | Position              | Sequence         | Peptide ID       | Region ID        | Donor     | Response (SFC/10 <sup>6</sup> ) |        |       |     |     |
|----------|-----------------------|-----------------------|-----------------------|------------------|------------------|------------------|-----------|---------------------------------|--------|-------|-----|-----|
|          |                       |                       |                       |                  |                  |                  |           | IFNg                            | IL-5   | Total |     |     |
| Fungi    | Alternaria rot fungus | Alt a 1               | 6                     | IASLFAAAGLAAAAP  | 3324.0015        | 1.01             | U00129    |                                 | 1830   | 1830  |     |     |
|          |                       | Alt a 1               | 6                     | IASLFAAAGLAAAAP  | 3324.0015        | 1.01             | U00064    |                                 | 93     | 93    |     |     |
|          |                       | Alt a 1               | 11                    | AAAGLAAAAPLESRQ  | 3324.0017        | 1.01             | D00003    |                                 | 87     | 87    |     |     |
|          |                       | Alt a 1               | 11                    | AAAGLAAAAPLESRQ  | 3324.0017        | 1.01             | D00095    |                                 | 1298   | 1298  |     |     |
|          |                       | Alt a 1               | 11                    | AAAGLAAAAPLESRQ  | 3324.0017        | 1.01             | U00064    |                                 | 2357   | 2357  |     |     |
|          |                       | Alt a 1               | 111                   | KVSDDDITYVATATLP | 3324.0013        | 1.02             | U00122    | 197                             | 197    | 197   |     |     |
|          |                       | Alt a 1               | 111                   | KVSDDDITYVATATLP | 3324.0013        | 1.02             | D00069    |                                 | 53     | 53    |     |     |
|          |                       | Alt a 1               | 111                   | KVSDDDITYVATATLP | 3324.0013        | 1.02             | D00095    |                                 | 1468   | 1468  |     |     |
|          |                       | Alt a 1               | 111                   | KVSDDDITYVATATLP | 3324.0013        | 1.02             | U00064    |                                 | 123    | 123   |     |     |
|          |                       | Alt a 1               | 111                   | KVSDDDITYVATATLP | 3324.0013        | 1.02             | U00075    |                                 | 1310   | 1310  |     |     |
|          |                       | Alt a 1               | 111                   | KVSDDDITYVATATLP | 3324.0013        | 1.02             | U00097    |                                 | 712    | 712   |     |     |
|          |                       | Alt a 1               | 116                   | ITYVATATLPNYCRA  | 3324.0014        | 1.02             | D00095    |                                 | 2563   | 2563  |     |     |
|          |                       | Alt a 1               | 116                   | ITYVATATLPNYCRA  | 3324.0014        | 1.02             | D00069    |                                 | 327    | 327   |     |     |
|          |                       | Alt a 1               | 116                   | ITYVATATLPNYCRA  | 3324.0014        | 1.02             | D00107    | 157                             | 1123   | 1280  |     |     |
|          |                       | Alt a 1               | 116                   | ITYVATATLPNYCRA  | 3324.0014        | 1.02             | U00064    |                                 | 797    | 797   |     |     |
|          |                       | Alt a 1               | 116                   | ITYVATATLPNYCRA  | 3324.0014        | 1.02             | U00075    |                                 | 1405   | 1405  |     |     |
|          |                       | Alt a 1               | 116                   | ITYVATATLPNYCRA  | 3324.0014        | 1.02             | U00097    |                                 | 882    | 882   |     |     |
|          |                       | Alt a 1               | 116                   | ITYVATATLPNYCRA  | 3324.0014        | 1.02             | U00122    | 133                             | 133    | 133   |     |     |
|          |                       | Alt a 1               | 141                   | QGVADAYITLVTLPK  | 3324.0011        | 1.03             | D00003    |                                 | 623    | 623   |     |     |
|          |                       | Alt a 1               | 141                   | QGVADAYITLVTLPK  | 3324.0011        | 1.03             | D00095    | 397                             | 1768   | 2165  |     |     |
|          |                       | Alt a 1               | 141                   | QGVADAYITLVTLPK  | 3324.0011        | 1.03             | U00064    |                                 | 1777   | 1777  |     |     |
|          |                       | Alt a 1               | 141                   | QGVADAYITLVTLPK  | 3324.0011        | 1.03             | U00129    |                                 | 670    | 670   |     |     |
|          |                       | Alt a 1               | 141                   | QGVADAYITLVTLPK  | 3324.0011        | 1.03             | D00107    |                                 | 298    | 298   |     |     |
|          |                       | Alt a 1               | 143                   | VADAYITLVTLPKSS  | 3324.0016        | 1.03             | D00107    |                                 | 533    | 533   |     |     |
|          |                       | Alt a 1               | 143                   | VADAYITLVTLPKSS  | 3324.0016        | 1.03             | D00095    |                                 | 1728   | 1728  |     |     |
|          |                       | Alt a 1               | 143                   | VADAYITLVTLPKSS  | 3324.0016        | 1.03             | D00003    |                                 | 353    | 353   |     |     |
|          |                       | Alt a 1               | 143                   | VADAYITLVTLPKSS  | 3324.0016        | 1.03             | U00064    |                                 | 1323   | 1323  |     |     |
|          |                       | Alt a 12              | 1                     | MSTSELATSYAALIL  | 3324.0036        | 1.04             | U00075    | 370                             | 1513   | 1883  |     |     |
|          |                       | Alt a 12              | 6                     | LATSYYAALILADDGV | 3324.0035        | 1.04             | U00075    | 540                             | 703    | 1243  |     |     |
|          |                       | Alt a 12              | 26                    | KLQSLIKAAKIEVE   | 3324.0037        | 1.05             | U00075    |                                 | 80     | 80    |     |     |
|          |                       | Alt a 13              | 11                    | QKLVLFVAVKGTATST | 3324.0044        | 1.06             | U00075    |                                 | 70     | 70    |     |     |
|          |                       | Alt a 13              | 166                   | GQQYLAWLNEKFKRS  | 3324.0045        | 1.07             | U00075    |                                 | 63     | 63    |     |     |
|          |                       | Alt a 5               | 51                    | INELIASGSEKLASV  | 3324.0065        | 1.08             | U00075    |                                 | 337    | 337   |     |     |
|          |                       | Alt a 5               | 51                    | INELIASGSEKLASV  | 3324.0065        | 1.08             | U00102    |                                 | 3113   | 3113  |     |     |
|          |                       | Alt a 6               | 1                     | MTITKIHARSVYDSR  | 3324.0075        | 1.09             | U00064    |                                 | 47     | 47    |     |     |
|          |                       | Alt a 6               | 106                   | LGANAILGVSMIAIK  | 3324.0069        | 1.10             | D00095    |                                 | 418    | 418   |     |     |
|          |                       | Alt a 6               | 116                   | MAIAKAAAIAEKGVPL | 3324.0074        | 1.11             | U00129    |                                 | 63     | 63    |     |     |
|          |                       | Alt a 6               | 161                   | GGRLAFQEFMIVPCE  | 3324.0073        | 1.12             | D00069    |                                 | 328    | 328   |     |     |
|          |                       | Alt a 6               | 161                   | GGRLAFQEFMIVPCE  | 3324.0073        | 1.12             | D00107    | 807                             | 103    | 910   |     |     |
|          |                       | Alt a 6               | 186                   | GAEVYQKLLAKAKT   | 3324.0072        | 1.13             | D00069    |                                 | 173    | 173   |     |     |
|          |                       | Alt a 6               | 271                   | KSKWLTVEQLAEMYK  | 3324.0068        | 1.14             | U00064    |                                 | 47     | 47    |     |     |
|          |                       | Alt a 6               | 306                   | EAWSYFFKTYDQIV   | 3324.0067        | 1.15             | U00129    |                                 | 90     | 90    |     |     |
|          |                       | Alt a 6               | 341                   | CNALLLKVNQIGTIT  | 3324.0071        | 1.16             | U00129    |                                 | 1223   | 1223  |     |     |
|          |                       | Alt a 6               | 366                   | GAGWGVMSVSHRSGET | 3324.0078        | 1.17             | D00003    |                                 | 63     | 63    |     |     |
|          |                       | Alt a 6               | 406                   | ERLAKLNQILRIEEE  | 3324.0076        | 1.18             | U00075    | 1080                            | 1080   | 1080  |     |     |
|          |                       | Alt a 7               | 141                   | IYVPLGYKTAFSMLA  | 3324.0079        | 1.19             | U00122    | 103                             | 103    | 103   |     |     |
|          |                       | Alt a 7               | 190                   | AQGKAFYEAVAKAHQ  | 3324.0080        | 1.20             | D00003    |                                 | 290    | 290   |     |     |
|          |                       | Alt a 7               | 190                   | AQGKAFYEAVAKAHQ  | 3324.0080        | 1.20             | U00122    | 107                             | 107    | 107   |     |     |
|          |                       | Alt a 7               | 36                    | LFQVAETLPQEVLDK  | 3324.0084        | 1.21             | D00003    |                                 | 170    | 170   |     |     |
|          |                       | Alt a 7               | 6                     | AIVYYSMYGHKMA    | 3324.0085        | 1.22             | U00075    |                                 | 137    | 137   |     |     |
|          |                       | Alt a 7               | 6                     | AIVYYSMYGHKMA    | 3324.0085        | 1.22             | D00003    |                                 | 590    | 590   |     |     |
|          |                       | Alt a 8               | 236                   | ELKGAYVYFASDASS  | 3324.0088        | 1.23             | U00075    |                                 | 247    | 247   |     |     |
|          |                       | Alt a 8               | 216                   | QDIQKLWHSIMPMPGR | 3324.0092        | 1.24             | D00003    |                                 | 190    | 190   |     |     |
|          |                       | Alt a 8               | 151                   | TGSLVITSSMSGHIA  | 3324.0093        | 1.25             | U00097    |                                 | 378    | 378   |     |     |
|          |                       | Aspergillus fumigatus | Asp f 1               | 146              | ARVIYTPNKNVFCGI  | 3324.0124        | 1.26      | U00109                          | 318    | 87    | 405 |     |
|          |                       |                       | Asp f 12              | 391              | KNIVKKTLELFNEIA  | 3324.0175        | 1.27      | U00109                          | 83     | 83    | 83  |     |
|          |                       |                       | Asp f 13              | 256              | LGGGYSYAFNNAVEN  | 3324.0190        | 1.28      | U00122                          | 442    | 442   | 442 |     |
|          |                       |                       | Asp f 13              | 231              | LDGFNWA VNDIVSKG | 3324.0192        | 1.29      | U00122                          | 507    | 277   | 783 |     |
|          |                       |                       | Asp f 17              | 116              | ADSLAKAISAKVPES  | 3324.0209        | 1.30      | U00050                          | 477    | 477   | 477 |     |
|          |                       |                       | Asp f 17              | 136              | AQLSAGITAAIQKGI  | 3324.0210        | 1.31      | U00121                          | 171    | 171   | 171 |     |
|          |                       |                       | Asp f 17              | 91               | SKDKFVAANAGGTV   | 3324.0212        | 1.32      | U00113                          | 157    | 157   | 157 |     |
|          |                       |                       | Asp f 17              | 91               | SKDKFVAANAGGTV   | 3324.0212        | 1.32      | U00109                          | 657    | 657   | 657 |     |
|          |                       |                       | Asp f 17              | 101              | AGGTVEYEDLKAQYTA | 3324.0213        | 1.33      | U00113                          | 200    | 200   | 200 |     |
|          |                       |                       | Asp f 22              | 161              | GGRLAFQEFMIVPDS  | 3324.0252        | 1.34      | U00050                          | 380    | 380   | 380 |     |
|          |                       |                       | Asp f 27              | 106              | TNGSQFFITTVVTSW  | 3324.0262        | 1.35      | U00109                          | 87     | 87    | 87  |     |
|          |                       |                       | Asp f 4               | 41               | DTVYATINGVLVSWI  | 3324.0288        | 1.36      | U00109                          | 112    | 112   | 112 |     |
|          |                       |                       | Cladosporium herbarum | Cla h 10         | 341              | SKVQFDRIMEYIYAG  | 3324.0560 | 1.37                            | U00110 |       | 113 | 113 |
|          |                       |                       |                       | Cla h 5          | 1                | MKYLA AFLLLGLAGN | 3324.0573 | 1.38                            | U00107 |       | 43  | 43  |
|          |                       |                       |                       | Cla h 5          | 6                | AFLLLGLAGNSSPSA  | 3324.0576 | 1.38                            | U00107 | 103   | 103 | 103 |
|          |                       | Cla h 5               |                       | 6                | AFLLLGLAGNSSPSA  | 3324.0576        | 1.38      | U00122                          |        | 143   | 143 |     |
|          |                       | Cla h 6               |                       | 111              | ILGVSMVAKAAAEE   | 3324.0586        | 1.39      | U00128                          | 177    | 177   | 177 |     |
|          |                       | Cla h 6               |                       | 126              | KRVPLYAHISDLST   | 3324.0590        | 1.40      | U00129                          |        | 67    | 67  |     |
|          |                       | Cla h 6               |                       | 161              | GGRLAFQEFMIVPDS  | 3324.0588        | 1.41      | U00101                          |        | 130   | 130 |     |
|          |                       | Cla h 6               |                       | 161              | GGRLAFQEFMIVPDS  | 3324.0588        | 1.41      | U00110                          | 833    | 157   | 990 |     |
|          |                       | Cla h 6               |                       | 161              | GGRLAFQEFMIVPDS  | 3324.0588        | 1.41      | U00128                          |        | 962   | 962 |     |
|          |                       | Cla h 6               |                       | 166              | FQEFMIVPDSGAPSFT | 3324.0581        | 1.41      | U00128                          |        | 277   | 277 |     |
|          |                       | Cla h 6               |                       | 186              | GAEVYQKLLKSLTKKR | 3324.0585        | 1.42      | U00128                          | 343    | 343   | 343 |     |
|          |                       | Cla h 6               |                       | 281              | ADQYKQLAAYPIVS   | 3324.0593        | 1.43      | U00110                          |        | 53    | 53  |     |
|          |                       | Cla h 6               |                       | 306              | EAWSYFYKTSGSDFO  | 3324.0580        | 1.44      | D00073                          | 70     | 70    | 70  |     |
|          |                       | Cla h 7               |                       | 1                | MAPKIAIFYSTWGH   | 3324.0597        | 1.45      | U00128                          | 112    | 112   | 112 |     |
|          |                       | Cla h 7               |                       | 131              | AMSTLSHHGHYVPL   | 3327.0019        | 1.46      | U00128                          | 117    | 117   | 117 |     |
|          |                       | Cla h 8               |                       | 46               | GAAVAITYASRAQGA  | 3324.0600        | 1.47      | D00073                          | 150    | 150   | 150 |     |
|          |                       | Cla h 8               |                       | 101              | QIDAFIANAGATADS  | 3324.0601        | 1.48      | D00073                          | 230    | 230   | 230 |     |
|          |                       | Cla h 8               |                       | 101              | QIDAFIANAGATADS  | 3324.0601        | 1.48      | U00107                          | 87     | 87    | 87  |     |
|          |                       | Cla h 8               |                       | 151              | GTGSLVITASMSGHI  | 3324.0603        | 1.49      | U00079                          |        | 420   | 420 |     |
|          |                       | Cla h 8               |                       | 151              | GTGSLVITASMSGHI  | 3324.0603        | 1.49      | U00107                          |        | 50    | 50  |     |
|          |                       | Cla h 8               | 181                   | GCIHMARSLANEWRD  | 3324.0602        | 1.50             | U00079    |                                 | 130    | 130   |     |     |

Supplemental Table 3. Positive donor/peptide responses

| Category                | Organism           | Antigen         | Position        | Sequence         | Peptide ID | Region ID | Donor  | Response (SFC/10 <sup>6</sup> ) |      |       |
|-------------------------|--------------------|-----------------|-----------------|------------------|------------|-----------|--------|---------------------------------|------|-------|
|                         |                    |                 |                 |                  |            |           |        | IFNg                            | IL-5 | Total |
| Penicillium chrysogenum |                    | Cl a h 8        | 181             | GCIHMARSLANEWRD  | 3324.0602  | 1.50      | U00107 | 500                             | 187  | 687   |
|                         |                    | Cl a h 8        | 236             | KELKGAYVYFASDAS  | 3324.0598  | 1.51      | U00079 |                                 | 3540 | 3540  |
|                         |                    | Cl a h 8        | 236             | KELKGAYVYFASDAS  | 3324.0598  | 1.51      | U00128 | 527                             |      | 527   |
|                         |                    | Cl a h 8        | 241             | AYVYFASDASTYTTG  | 3324.0599  | 1.51      | U00079 |                                 | 2003 | 2003  |
|                         |                    | Pen ch 13       | 6               | VLATSLATLAVVDAG  | 3324.1300  | 1.52      | U00050 | 170                             |      | 170   |
|                         |                    | Pen ch 13       | 36              | YIVVMNDVSTAFAFS  | 3324.1311  | 1.53      | U00050 | 140                             |      | 140   |
|                         |                    | Pen ch 13       | 101             | PAVKYIEPDMIVNAT  | 3324.1304  | 1.54      | U00050 | 263                             |      | 263   |
|                         |                    | Pen ch 13       | 101             | PAVKYIEPDMIVNAT  | 3324.1304  | 1.54      | U00137 | 413                             |      | 413   |
|                         |                    | Pen ch 13       | 111             | IVNATANVQSNVPS   | 3324.1306  | 1.55      | U00137 | 353                             |      | 353   |
|                         |                    | Pen ch 13       | 201             | YGVAKKATLVAVKVL  | 3324.1305  | 1.56      | U00137 | 320                             |      | 320   |
|                         |                    | Pen ch 13       | 266             | NVVKSGIFLSVAAGN  | 3324.1299  | 1.57      | U00050 | 173                             |      | 173   |
|                         |                    | Pen ch 13       | 266             | NVVKSGIFLSVAAGN  | 3324.1299  | 1.57      | U00137 | 400                             |      | 400   |
|                         |                    | Pen ch 13       | 271             | GIFLSVAAGNEAENA  | 3324.1303  | 1.57      | U00050 | 213                             |      | 213   |
|                         |                    | Pen ch 13       | 271             | GIFLSVAAGNEAENA  | 3324.1303  | 1.57      | U00137 | 1250                            |      | 1250  |
|                         |                    | Pen ch 13       | 346             | APHVAGVAAYLMALE  | 3324.1296  | 1.58      | U00137 | 333                             |      | 333   |
|                         |                    | Pen ch 13       | 371             | IVQLATSSISRAPSG  | 3324.1302  | 1.59      | U00137 | 310                             |      | 310   |
|                         |                    | Pen ch 18       | 1               | MKGFLSLTLPLVA    | 3324.1314  | 1.60      | U00109 | 193                             |      | 193   |
|                         |                    | Pen ch 18       | 26              | NDAAPILSSMTSKDI  | 3324.1332  | 1.61      | U00047 |                                 | 200  | 200   |
|                         |                    | Pen ch 18       | 96              | TFHIIAGSLGAGHF   | 3324.1323  | 1.62      | U00047 |                                 | 240  | 240   |
|                         |                    | Pen ch 18       | 226             | KFGVAKKANVYAVKV  | 3324.1330  | 1.63      | U00047 |                                 | 360  | 360   |
| Pen ch 18               | 226                | KFGVAKKANVYAVKV | 3324.1330       | 1.63             | U00122     |           | 247    | 247                             |      |       |
| Pen ch 18               | 291                | LDLAVNAAVDAGIHF | 3324.1331       | 1.64             | U00047     |           | 280    | 280                             |      |       |
| Pen ch 18               | 291                | LDLAVNAAVDAGIHF | 3324.1331       | 1.64             | U00109     | 1237      | 427    | 1663                            |      |       |
| Pen ch 18               | 291                | LDLAVNAAVDAGIHF | 3324.1331       | 1.64             | U00122     |           | 537    | 537                             |      |       |
| Pen ch 18               | 301                | AGIHFAVAAGNDNAD | 3324.1324       | 1.65             | U00109     | 207       |        | 207                             |      |       |
| Pen ch 18               | 381                | HIAGLLAYVSLAPA  | 3324.1313       | 1.66             | U00047     |           | 250    | 250                             |      |       |
| Pen ch 18               | 411                | KAALISVATEGLTD  | 3324.1326       | 1.67             | U00047     |           | 320    | 320                             |      |       |
| Pen ch 18               | 476                | AFHKELGAIYSEIKD | 3324.1328       | 1.68             | U00109     | 343       |        | 343                             |      |       |
| Pen ch 18               | 176                | VDAYVIDTGANVKHV | 3324.1327       | 1.69             | U00132     | 1117      |        | 1117                            |      |       |
| Indoor allergens        | American cockroach | Per a 3         | 151             | YGSIFHFYRLLVGHV  | 3324.1394  | 2.01      | D00054 | 160                             |      | 160   |
|                         |                    | Per a 3         | 191             | FYQLWKRIDHIVQKY  | 3324.1404  | 2.02      | D00054 | 350                             |      | 350   |
|                         | Cat                | Per a 3         | 446             | YTPNMYFKDVIHFHK  | 3324.1415  | 2.03      | D00054 | 180                             |      | 180   |
|                         |                    | Fel d 1 1       | 41              | DEYVEQVAQYKALPV  | 3324.1049  | 2.15      | D00073 |                                 | 120  | 120   |
|                         |                    | Fel d 1 1       | 41              | DEYVEQVAQYKALPV  | 3324.1049  | 2.15      | U00046 |                                 | 270  | 270   |
|                         |                    | Fel d 1 1       | 46              | QVAQYKALPVVLENA  | 3324.1051  | 2.15      | U00046 |                                 | 2622 | 2622  |
|                         |                    | Fel d 1 1       | 46              | QVAQYKALPVVLENA  | 3324.1051  | 2.15      | U00079 |                                 | 3323 | 3323  |
|                         |                    | Fel d 1 1       | 51              | KALPVVLENARILKN  | 3324.1048  | 2.15      | U00046 |                                 | 660  | 660   |
|                         |                    | Fel d 1 1       | 78              | NALSVLDKIYTSPLC  | 3324.1050  | 2.16      | D00073 | 587                             | 980  | 1567  |
|                         |                    | Fel d 1 1       | 78              | NALSVLDKIYTSPLC  | 3324.1050  | 2.16      | U00029 | 823                             | 213  | 1037  |
|                         |                    | Fel d 1 1       | 78              | NALSVLDKIYTSPLC  | 3324.1050  | 2.16      | U00079 |                                 | 850  | 850   |
|                         |                    | Fel d 1 2       | 21              | AETCPIFYDVFFAVA  | 3324.1056  | 2.17      | D00073 | 1477                            | 997  | 2473  |
|                         |                    | Fel d 1 2       | 21              | AETCPIFYDVFFAVA  | 3324.1056  | 2.17      | D00069 |                                 | 503  | 503   |
|                         |                    | Fel d 1 2       | 21              | AETCPIFYDVFFAVA  | 3324.1056  | 2.17      | U00046 |                                 | 1797 | 1797  |
|                         |                    | Fel d 1 2       | 21              | AETCPIFYDVFFAVA  | 3324.1056  | 2.17      | U00106 |                                 | 557  | 557   |
|                         |                    | Fel d 1 2       | 21              | AETCPIFYDVFFAVA  | 3324.1056  | 2.17      | U00128 | 570                             |      | 570   |
|                         |                    | Fel d 1 2       | 26              | IFYDVFFAVANGNEL  | 3324.1052  | 2.17      | U00079 |                                 | 903  | 903   |
|                         | Fel d 1 2          | 26              | IFYDVFFAVANGNEL | 3324.1052        | 2.17       | U00128    | 115    |                                 | 115  |       |
|                         | Fel d 1 2          | 26              | IFYDVFFAVANGNEL | 3324.1052        | 2.17       | U00106    |        | 1337                            | 1337 |       |
|                         | Fel d 1 2          | 26              | IFYDVFFAVANGNEL | 3324.1052        | 2.17       | D00069    |        | 237                             | 237  |       |
|                         | Fel d 1 2          | 26              | IFYDVFFAVANGNEL | 3324.1052        | 2.17       | U00046    |        | 1530                            | 1530 |       |
|                         | Fel d 1 2          | 36              | NGNELLLDLSLTKVN | 3324.1055        | 2.18       | U00106    |        | 100                             | 100  |       |
|                         | Fel d 1 2          | 36              | NGNELLLDLSLTKVN | 3324.1055        | 2.18       | D00073    | 1187   | 1550                            | 2737 |       |
|                         | Fel d 1 2          | 66              | YVENGLISRVLDGLV | 3324.1057        | 2.19       | U00079    |        | 183                             | 183  |       |
|                         | Fel d 4            | 56              | VFVEHIKALDNSSLS | 3324.1090        | 2.20       | U00029    |        | 58                              | 58   |       |
|                         | Fel d 4            | 96              | YTVVYDGYNVFSIVE | 3324.1100        | 2.21       | U00029    |        | 270                             | 270  |       |
|                         | Fel d 4            | 116             | YILLHLLNFDKTRPF | 3324.1093        | 2.22       | U00029    |        | 73                              | 73   |       |
|                         | Dog                | Can f 3         | 156             | QLFLGKLYEIAARRH  | 3324.0499  | 2.23      | U00117 | 77                              |      | 77    |
|                         |                    | Can f 3         | 176             | PELLYYAQYQKGVFA  | 3324.0508  | 2.24      | U00117 | 53                              |      | 53    |
|                         |                    | Can f 3         | 421             | KLGEYGFQNALLVRY  | 3324.0498  | 2.25      | U00117 | 87                              |      | 87    |
|                         |                    | Can f 3         | 476             | FLSVLNRCLVLEHEK  | 3324.0500  | 2.26      | U00117 | 77                              |      | 77    |
|                         |                    | Can f 3         | 531             | FTFHADLCTLPEAEK  | 3324.0509  | 2.27      | U00117 | 60                              |      | 60    |
|                         |                    | Der f 1         | 46              | ARKNFLES�KYVEAN  | 3324.0668  | 2.28      | U00117 | 67                              |      | 67    |
|                         |                    | Der f 1         | 86              | FEQLKTQFDLNAETS  | 3324.0682  | 2.29      | U00117 | 70                              |      | 70    |
|                         | D. farinae         | Der f 1         | 131             | GSCWAFSGVAATESA  | 3324.0670  | 2.30      | U00050 | 297                             | 542  | 838   |
|                         |                    | Der f 1         | 131             | GSCWAFSGVAATESA  | 3324.0670  | 2.30      | U00117 | 470                             |      | 470   |
|                         |                    | Der f 1         | 136             | FSGVAATESAYLAYR  | 3324.0666  | 2.30      | U00117 | 610                             |      | 610   |
|                         |                    | Der f 1         | 136             | FSGVAATESAYLAYR  | 3324.0666  | 2.30      | U00050 | 343                             | 77   | 420   |
|                         |                    | Der f 1         | 141             | ATESAYLAYRNTSLD  | 3324.0674  | 2.30      | U00050 | 217                             |      | 217   |
|                         |                    | Der f 1         | 141             | ATESAYLAYRNTSLD  | 3324.0674  | 2.30      | U00117 | 80                              |      | 80    |
|                         |                    | Der f 10        | 106             | LKIATAKLEESQSA   | 3324.0689  | 2.31      | D00069 | 67                              |      | 67    |
|                         |                    | Der f 10        | 191             | VELEELRVDVGGNNLK | 3324.0690  | 2.32      | D00069 | 70                              |      | 70    |
|                         |                    | Der f 10        | 221             | YEQQIRIMTAKLKEA  | 3324.0687  | 2.33      | D00069 | 60                              |      | 60    |
|                         |                    | Der f 11        | 311             | ELRVKIAELQLQHE   | 3324.0715  | 2.34      | U00131 | 433                             |      | 433   |
|                         |                    | Der f 13        | 6               | GKYKLEKSEKDFEFL  | 3324.0727  | 2.35      | U00124 |                                 | 240  | 240   |
|                         |                    | Der f 13        | 26              | GFMVKTAAKTLKPTF  | 3324.0725  | 2.36      | U00124 |                                 | 2600 | 2600  |
|                         |                    | Der f 13        | 46              | NDQYIFRSLSTFKNT  | 3324.0724  | 2.37      | U00124 |                                 | 487  | 487   |
| Der f 13                |                    | 51              | FRSLSTFKNTEAKFK | 3324.0726        | 2.37       | U00124    |        | 570                             | 570  |       |
| Der f 14                |                    | 196             | VRPFKMHGNSDIKLM | 3324.0739        | 2.38       | U00050    | 647    |                                 | 647  |       |
| Der f 16                |                    | 11              | IPIGHTFFFIWRIKQ | 3324.0772        | 2.39       | U00099    | 160    |                                 | 160  |       |
| Der f 16                |                    | 216             | FKLSVILEDGKEVE  | 3324.0767        | 2.40       | U00099    | 177    |                                 | 177  |       |
| Der f 16                | 236                | EYDAFNKALSŁDKKD | 3324.0775       | 2.41             | U00099     | 230       |        | 230                             |      |       |
| Der f 16                | 291                | ISFVKNGPLSRADLD | 3324.0776       | 2.42             | U00099     | 183       |        | 183                             |      |       |
| Der f 16                | 366                | FKSLFESWQMSQEK  | 3324.0763       | 2.43             | U00099     | 230       |        | 230                             |      |       |
| Der f 16                | 381                | ITSARLFRVSRNGIF | 3324.0764       | 2.44             | U00099     | 223       |        | 223                             |      |       |
| Der f 16                | 416                | VMDKIYVWIGNQFAE | 3324.0766       | 2.45             | U00099     | 160       |        | 160                             |      |       |
| Der f 16                | 451                | SGRKFQPNQIHKLQ  | 3324.0765       | 2.46             | U00093     | 1560      |        | 1560                            |      |       |
| Der f 18                | 126                | TFVVSTVDLMTRYGF | 3324.0790       | 2.47             | D00069     | 63        |        | 63                              |      |       |

Supplemental Table 3. Positive donor/peptide responses

| Category         | Organism | Antigen         | Position        | Sequence         | Peptide ID       | Region ID | Donor  | Response (SFC/10 <sup>6</sup> ) |      |       |      |
|------------------|----------|-----------------|-----------------|------------------|------------------|-----------|--------|---------------------------------|------|-------|------|
|                  |          |                 |                 |                  |                  |           |        | IFNg                            | IL-5 | Total |      |
| D. pteronyssinus |          | Der f 18        | 171             | HTSFVMGVTLPATIA  | 3324.0789        | 2.48      | D00069 | 143                             |      | 143   |      |
|                  |          | Der f 2         | 121             | VVVTVKLGIDNGVLA  | 3337.0026        | 2.49      | D00069 | 63                              |      | 63    |      |
|                  |          | Der p 1         | 11              | LALSAVYARPSSIKT  | 3324.0828        | 2.50      | U00050 | 267                             | 77   | 343   |      |
|                  |          | Der p 1         | 31              | KAFNKSYATFEDEEA  | 3324.0834        | 2.51      | U00050 | 1563                            | 703  | 2267  |      |
|                  |          | Der p 1         | 46              | ARKNFLESVKYVQSN  | 3324.0839        | 2.52      | U00108 |                                 | 487  | 487   |      |
|                  |          | Der p 1         | 51              | LESVKYVQSNGGAIN  | 3324.0838        | 2.53      | U00117 |                                 | 467  | 467   |      |
|                  |          | Der p 1         | 61              | GGAINHLSDLSDLEF  | 3324.0842        | 2.54      | U00050 | 170                             | 603  | 773   |      |
|                  |          | Der p 1         | 111             | EIDLRQMRTVTPIRM  | 3324.0836        | 2.55      | U00117 | 120                             | 613  | 733   |      |
|                  |          | Der p 1         | 131             | SCWAFSGVAATESAY  | 3324.0832        | 2.56      | U00050 | 843                             | 460  | 1303  |      |
|                  |          | Der p 1         | 131             | SCWAFSGVAATESAY  | 3324.0832        | 2.56      | U00117 | 233                             | 773  | 1007  |      |
|                  |          | Der p 1         | 136             | SGVAATESAYLAYRN  | 3324.0829        | 2.56      | U00117 | 340                             | 347  | 687   |      |
|                  |          | Der p 1         | 136             | SGVAATESAYLAYRN  | 3324.0829        | 2.56      | U00050 | 237                             | 167  | 403   |      |
|                  |          | Der p 1         | 176             | RGIEYIQHNGVVQES  | 3324.0831        | 2.57      | U00117 |                                 | 567  | 567   |      |
|                  |          | Der p 1         | 176             | RGIEYIQHNGVVQES  | 3324.0831        | 2.57      | U00050 | 220                             | 103  | 323   |      |
|                  |          | Der p 1         | 226             | REALAQTHSAIAVII  | 3324.0840        | 2.58      | U00050 | 1407                            | 477  | 1883  |      |
|                  |          | Der p 1         | 226             | REALAQTHSAIAVII  | 3324.0840        | 2.58      | U00117 |                                 | 900  | 900   |      |
|                  |          | Der p 1         | 231             | QTHSAIAVIIKIDL   | 3324.0835        | 2.58      | U00117 |                                 | 317  | 317   |      |
|                  |          | Der p 1         | 296             | DNGYGYFAANIDLMM  | 3324.0827        | 2.59      | U00117 |                                 | 53   | 53    |      |
|                  |          | Der p 14        | 96              | FAFGYFNGRILGVCP  | 3324.0914        | 2.60      | U00093 | 133                             |      | 133   |      |
|                  |          | Der p 14        | 476             | NAMDEIHKSTDAEPA  | 3324.0918        | 2.61      | U00117 | 260                             |      | 260   |      |
|                  |          | Der p 14        | 746             | TGLPLMYKFGDNLVV  | 3324.0922        | 2.62      | U00131 | 247                             |      | 247   |      |
|                  |          | Der p 14        | 1346            | NGKHLHSLIDPSTLS  | 3324.0894        | 2.63      | U00102 | 460                             |      | 460   |      |
|                  |          | Der p 2         | 101             | QQYDIKYTWNVPKIA  | 3324.0940        | 2.64      | U00117 |                                 | 1333 | 1333  |      |
|                  |          | Der p 3         | 16              | TLANPILPASP NATI | 3324.0969        | 2.65      | U00108 |                                 | 167  | 167   |      |
|                  |          | Der p 3         | 61              | EYWILTAAHCVAGQT  | 3324.0966        | 2.66      | U00108 |                                 | 203  | 203   |      |
|                  |          | Der p 3         | 81              | IRYNSLKHSLGGKEI  | 3324.0968        | 2.67      | U00108 |                                 | 137  | 137   |      |
|                  |          | Der p 3         | 91              | GGEKISVAKIFAHEK  | 3324.0964        | 2.68      | U00108 |                                 | 137  | 137   |      |
|                  |          | Der p 3         | 111             | IDNDIALIKLKSPMK  | 3324.0967        | 2.69      | U00108 |                                 | 187  | 187   |      |
|                  |          | Der p 3         | 166             | SELRRVDIAVVS RKE | 3324.0960        | 2.70      | U00108 |                                 | 120  | 120   |      |
|                  |          | Der p 4         | 46              | FDLFLMERIHEQIKK  | 3324.0998        | 2.71      | U00108 |                                 | 143  | 143   |      |
|                  |          | Der p 4         | 61              | GELALFYLQEQINHF  | 3324.0997        | 2.72      | U00108 |                                 | 113  | 113   |      |
|                  |          | Der p 4         | 86              | NKAGVRIYVDIVLNH  | 3324.0981        | 2.73      | U00108 | 93                              | 2017 | 2110  |      |
|                  |          | Der p 4         | 86              | NKAGVRIYVDIVLNH  | 3324.0981        | 2.73      | U00128 |                                 | 1260 | 1260  |      |
|                  |          | Der p 4         | 91              | RIYVDIVLNHMTGAQ  | 3324.0988        | 2.73      | U00108 |                                 | 117  | 117   |      |
|                  |          | Der p 4         | 96              | IVLNHMTGAQSGKGT  | 3324.0987        | 2.73      | U00117 |                                 | 507  | 507   |      |
|                  |          | Der p 4         | 201             | PDDLRSIYRLHNLN   | 3324.0979        | 2.74      | U00108 |                                 | 177  | 177   |      |
|                  |          | Der p 4         | 206             | SIYSRLHNLNKEFFP  | 3324.0989        | 2.74      | U00108 |                                 | 117  | 117   |      |
|                  |          | Der p 4         | 251             | IEFRFYKEITNVFRG  | 3324.0976        | 2.75      | U00108 |                                 | 153  | 153   |      |
|                  |          | Der p 4         | 251             | IEFRFYKEITNVFRG  | 3324.0976        | 2.75      | U00117 |                                 | 610  | 610   |      |
|                  |          | Der p 4         | 286             | DALVMIDSHDLRVGH  | 3324.0992        | 2.76      | U00128 |                                 | 290  | 290   |      |
|                  |          | Der p 4         | 311             | FEGRLLKAATAFMLA  | 3324.0973        | 2.77      | U00108 |                                 | 113  | 113   |      |
|                  |          | Der p 4         | 311             | FEGRLLKAATAFMLA  | 3324.0973        | 2.77      | U00117 |                                 | 953  | 953   |      |
|                  |          | Der p 4         | 316             | LKAATAFMLAWNYGV  | 3324.0972        | 2.77      | U00117 |                                 | 757  | 757   |      |
|                  |          | Der p 4         | 321             | AFMLAWNYGVPRVMS  | 3324.0977        | 2.77      | U00117 |                                 | 1413 | 1413  |      |
|                  |          | Der p 4         | 321             | AFMLAWNYGVPRVMS  | 3324.0977        | 2.77      | U00108 |                                 | 157  | 157   |      |
|                  |          | Der p 4         | 331             | PRVMSSYFWNQIHK   | 3324.0991        | 2.78      | U00117 |                                 | 152  | 152   |      |
|                  |          | Der p 4         | 381             | EHRWREIYNMVKFRM  | 3324.0986        | 2.79      | U00128 |                                 | 300  | 300   |      |
|                  |          | Der p 4         | 381             | EHRWREIYNMVKFRM  | 3324.0986        | 2.79      | U00093 | 1007                            |      | 1007  |      |
|                  |          | Der p 4         | 381             | EHRWREIYNMVKFRM  | 3324.0986        | 2.79      | U00108 |                                 | 80   | 80    |      |
|                  |          | Der p 4         | 381             | EHRWREIYNMVKFRM  | 3324.0986        | 2.79      | U00117 |                                 | 402  | 402   |      |
|                  |          | Der p 4         | 386             | EIYNMVKFRMIAGQE  | 3324.0978        | 2.79      | U00108 |                                 | 167  | 167   |      |
|                  |          | Der p 4         | 386             | EIYNMVKFRMIAGQE  | 3324.0978        | 2.79      | U00117 |                                 | 1100 | 1100  |      |
|                  |          | Der p 4         | 386             | EIYNMVKFRMIAGQE  | 3324.0978        | 2.79      | U00093 | 667                             |      | 667   |      |
|                  |          | Der p 4         | 391             | VKFRMIAGQEPVHNW  | 3324.0993        | 2.79      | U00117 |                                 | 92   | 92    |      |
|                  |          | Der p 4         | 411             | YQIAFSRGNRAFAIA  | 3324.0980        | 2.80      | U00108 |                                 | 177  | 177   |      |
|                  |          | Der p 4         | 411             | YQIAFSRGNRAFAIA  | 3324.0980        | 2.80      | U00117 |                                 | 380  | 380   |      |
|                  |          | Der p 4         | 416             | SRGNRAFIAINLQKN  | 3324.0974        | 2.80      | U00117 |                                 | 940  | 940   |      |
|                  |          | Der p 4         | 476             | YVGHDEFDAFVAYHI  | 3324.0975        | 2.81      | U00117 |                                 | 973  | 973   |      |
|                  |          | Der p 4         | 481             | EFDAFVAYHIGARIV  | 3324.0970        | 2.81      | U00108 |                                 | 123  | 123   |      |
|                  |          | Der p 4         | 481             | EFDAFVAYHIGARIV  | 3324.0970        | 2.81      | U00117 |                                 | 763  | 763   |      |
|                  |          | Der p 4         | 482             | FDAFVAYHIGARIVS  | 3324.0971        | 2.81      | U00108 |                                 | 187  | 187   |      |
|                  |          | Der p 5         | 111             | RKDLLDFEQYNLEMA  | 3324.1001        | 2.82      | U00108 |                                 | 117  | 117   |      |
|                  |          | Der p 9         | 181             | TLPTLQIASVTKMS   | 3324.1036        | 2.83      | U00108 |                                 | 120  | 120   |      |
|                  |          | Der p 9         | 256             | TIYSNVANLRNWIIS  | 3324.1040        | 2.84      | U00108 |                                 | 297  | 297   |      |
|                  |          | Der p 9         | 259             | SNVANLRNWHISNTG  | 3324.1043        | 2.84      | U00108 |                                 | 177  | 177   |      |
|                  | Trees    | Alder           | Aln g 1         | 11               | PSVIPAARLFKAFIL  | 3324.0004 | 3.01   | D00069                          | 683  |       | 683  |
|                  |          |                 | Aln g 1         | 16               | AARLFKAFILDGDKL  | 3324.0003 | 3.01   | U00110                          | 800  | 553   | 1353 |
|                  |          |                 | Aln g 1         | 111              | GGSLKISNKFHTKG   | 3324.0007 | 3.02   | U00032                          | 887  |       | 887  |
|                  |          |                 | Aln g 1         | 111              | GGSLKISNKFHTKG   | 3324.0007 | 3.02   | U00110                          | 357  |       | 357  |
| Aln g 1          |          |                 | 141             | AVGLLKAVESYLLAH  | 3324.0001        | 3.03      | D00069 | 597                             |      | 597   |      |
| Birch            |          |                 | Bet v 1         | 6                | YETETTSVIPAAARLF | 3324.0351 | 3.04   | D00094                          |      | 403   | 403  |
|                  |          |                 | Bet v 1         | 11               | TSVIPAAARLFKAFFL | 3324.0349 | 3.04   | D00094                          |      | 427   | 427  |
|                  |          |                 | Bet v 1         | 76               | DHTNFKYSYSVIEGG  | 3324.0350 | 3.05   | D00094                          |      | 413   | 413  |
|                  |          |                 | Bet v 1         | 96               | LEKISNEIKIVATPD  | 3324.0353 | 3.06   | D00067                          | 92   |       | 92   |
|                  |          |                 | Bet v 1         | 96               | LEKISNEIKIVATPD  | 3324.0353 | 3.06   | D00094                          |      | 370   | 370  |
|                  |          | Bet v 1         | 111             | GGSLKISNKYHTKG   | 3324.0352        | 3.07      | D00094 |                                 | 280  | 280   |      |
|                  |          | Bet v 1         | 111             | GGSLKISNKYHTKG   | 3324.0352        | 3.07      | D00067 | 612                             |      | 612   |      |
|                  |          | Bet v 1         | 111             | GGSLKISNKYHTKG   | 3324.0352        | 3.07      | D00073 | 240                             |      | 240   |      |
|                  |          | Bet v 1         | 146             | RAVESYLLAHS DAYN | 3324.0348        | 3.08      | D00094 |                                 | 293  | 293   |      |
|                  |          | Bet v 2         | 31              | DGSVWAQSSFPQFK   | 3324.0355        | 3.09      | D00094 |                                 | 1953 | 1953  |      |
| Bet v 2          |          | 66              | GLHLGGIKYMIQGE  | 3324.0356        | 3.10             | D00094    |        | 440                             | 440  |       |      |
| Bet v 2          |          | 71              | GIKYMIQGEAGAVI  | 3324.0354        | 3.10             | D00094    |        | 350                             | 350  |       |      |
| Bet v 3          |          | 61              | LSRALNLLGLETDLS | 3324.0364        | 3.11             | D00094    |        | 167                             | 167  |       |      |
| Bet v 6          |          | 71              | VKAFKQVDVVISTVG | 3324.0384        | 3.12             | U00053    | 1007   |                                 | 1007 |       |      |
| Bet v 6          |          | 206             | RTLNKIVYIKPAKNI | 3324.0387        | 3.13             | U00053    | 580    |                                 | 580  |       |      |
| Bet v 6          | 206      | RTLNKIVYIKPAKNI | 3324.0387       | 3.13             | U00103           | 140       |        | 140                             |      |       |      |
| Bet v 6          | 211      | IVYIKPAKNIYSFNE | 3324.0386       | 3.13             | U00103           | 227       |        | 227                             |      |       |      |



Supplemental Table 3. Positive donor/peptide responses

| Category     | Organism            | Antigen          | Position         | Sequence        | Peptide ID | Region ID | Donor  | Response (SFC/10 <sup>6</sup> ) |      |       |
|--------------|---------------------|------------------|------------------|-----------------|------------|-----------|--------|---------------------------------|------|-------|
|              |                     |                  |                  |                 |            |           |        | IFNg                            | IL-5 | Total |
| Rye grass    | Dac g 4             | 1                | DIYNYMEPYVSKVDP  | 3324.0663       | 4.09       | U00036    | 73     |                                 | 73   |       |
|              | Dac g 4             | 1                | DIYNYMEPYVSKVDP  | 3324.0663       | 4.09       | U00089    |        | 302                             | 302  |       |
|              | Dac g 4             | 1                | DIYNYMEPYVSKVDP  | 3324.0663       | 4.09       | U00102    |        | 107                             | 107  |       |
|              | Lol p 1             | 1                | MASSSSVLLVVALFA  | 3324.1133       | 4.10       | U00125    | 53     |                                 | 53   |       |
|              | Lol p 1             | 11               | VALFAVFLGSAHGIA  | 3324.1134       | 4.11       | U00099    |        | 208                             | 208  |       |
|              | Lol p 1             | 121              | EPIAPYHFDLSGHAF  | 3337.0028       | 4.12       | U00106    | 157    | 97                              | 253  |       |
|              | Lol p 1             | 176              | KASNPNYLAILVKYV  | 3324.1135       | 4.13       | U00099    |        | 837                             | 837  |       |
|              | Lol p 1             | 176              | KASNPNYLAILVKYV  | 3324.1135       | 4.13       | U00106    | 157    | 100                             | 257  |       |
|              | Lol p 1             | 176              | KASNPNYLAILVKYV  | 3324.1135       | 4.13       | U00125    |        | 87                              | 87   |       |
|              | Lol p 11            | 106              | KQQGIRYANPIAFFR  | 3324.1137       | 4.14       | U00125    |        | 123                             | 123  |       |
|              | Lol p 11            | 111              | RYANPIAFFRKEPLK  | 3324.1138       | 4.14       | U00125    | 440    | 1697                            | 2137 |       |
|              | Lol p 11            | 116              | IAFFRKEPLKCEGGI  | 3337.0029       | 4.14       | U00106    |        | 77                              | 257  |       |
|              | Lol p 2             | 51               | DGVWEIKSDKPLKGP  | 3324.1139       | 4.15       | U00106    | 103    |                                 | 103  |       |
|              | Lol p 2             | 51               | DGVWEIKSDKPLKGP  | 3324.1139       | 4.15       | U00125    | 83     | 83                              | 167  |       |
|              | Lol p 2             | 51               | DGVWEIKSDKPLKGP  | 3324.1139       | 4.15       | D00004    |        | 577                             | 577  |       |
|              | Lol p 2             | 51               | DGVWEIKSDKPLKGP  | 3324.1139       | 4.15       | U00110    |        | 287                             | 287  |       |
|              | Lol p 2             | 56               | IKSDKPLKGPFFNRF  | 3324.1140       | 4.15       | U00110    |        | 317                             | 317  |       |
|              | Lol p 2             | 76               | MRNVFDDVVPADFKV  | 3337.0030       | 4.16       | U00106    | 103    | 110                             | 213  |       |
|              | Lol p 2             | 76               | MRNVFDDVVPADFKV  | 3337.0030       | 4.16       | D00070    |        | 133                             | 133  |       |
|              | Lol p 2             | 76               | MRNVFDDVVPADFKV  | 3337.0030       | 4.16       | U00125    | 460    | 447                             | 907  |       |
|              | Lol p 3             | 11               | SDAKTLVLNLIKYTRP | 3324.1142       | 4.17       | U00036    |        | 227                             | 227  |       |
|              | Lol p 3             | 11               | SDAKTLVLNLIKYTRP | 3324.1142       | 4.17       | D00004    |        | 147                             | 147  |       |
|              | Lol p 3             | 11               | SDAKTLVLNLIKYTRP | 3324.1142       | 4.17       | U00110    | 150    | 1547                            | 1697 |       |
|              | Lol p 3             | 51               | LWEVKSAPPLTGPMN  | 3337.0031       | 4.18       | U00106    | 90     |                                 | 90   |       |
|              | Lol p 3             | 51               | LWEVKSAPPLTGPMN  | 3337.0031       | 4.18       | U00125    | 703    | 1010                            | 1713 |       |
|              | Lol p 3             | 76               | NVFDEVIPTAFTVGK  | 3324.1141       | 4.19       | U00099    |        | 2258                            | 2258 |       |
|              | Lol p 3             | 76               | NVFDEVIPTAFTVGK  | 3324.1141       | 4.19       | U00125    | 263    | 820                             | 1083 |       |
|              | Lol p 4             | 31               | PENFAVVDLQMRVAV  | 3324.1159       | 4.20       | U00117    | 75     |                                 | 75   |       |
|              | Lol p 4             | 101              | LRKYGIAAENVIDVK  | 3324.1145       | 4.21       | U00117    | 50     |                                 | 50   |       |
|              | Lol p 4             | 236              | NEMSWIESIPFVHLG  | 3324.1151       | 4.22       | U00117    | 1933   |                                 | 1933 |       |
|              | Lol p 4             | 321              | FPHRKGVLFNQYVN   | 3324.1152       | 4.23       | U00117    | 100    |                                 | 100  |       |
|              | Lol p 5 1           | 6                | HTVALFLAVLVAGP   | 3324.1166       | 4.24       | U00106    | 53     |                                 | 53   |       |
|              | Lol p 5 1           | 11               | FLAVALVAGPAASVA  | 3324.1170       | 4.24       | U00106    |        | 63                              | 63   |       |
|              | Lol p 5 1           | 71               | LIEKINAGFKAAVAA  | 3324.1175       | 4.25       | D00070    | 960    | 900                             | 1860 |       |
|              | Lol p 5 1           | 71               | LIEKINAGFKAAVAA  | 3324.1175       | 4.25       | U00099    |        | 1202                            | 1202 |       |
|              | Lol p 5 1           | 71               | LIEKINAGFKAAVAA  | 3324.1175       | 4.25       | U00106    |        | 263                             | 263  |       |
|              | Lol p 5 1           | 76               | NAGFKAAVAAAAVVP  | 3324.1168       | 4.25       | D00070    | 850    | 873                             | 1723 |       |
|              | Lol p 5 1           | 76               | NAGFKAAVAAAAVVP  | 3324.1168       | 4.25       | U00099    |        | 977                             | 977  |       |
|              | Lol p 5 1           | 76               | NAGFKAAVAAAAVVP  | 3324.1168       | 4.25       | U00106    |        | 248                             | 248  |       |
|              | Lol p 5 1           | 96               | KTFVETFGTATNKAF  | 3324.1171       | 4.26       | U00106    | 73     |                                 | 73   |       |
|              | Lol p 5 1           | 106              | TNKAFVEGLASGYAD  | 3324.1186       | 4.27       | U00099    |        | 287                             | 287  |       |
|              | Lol p 5 1           | 131              | DAALKLAYEAAQGAT  | 3324.1169       | 4.28       | D00070    | 120    |                                 | 120  |       |
|              | Lol p 5 1           | 146              | PEAKYDAYVATLREA  | 3324.1180       | 4.29       | D00070    | 227    |                                 | 227  |       |
|              | Lol p 5 1           | 151              | DAYVATLREALRVA   | 3324.1167       | 4.29       | D00070    | 1017   | 410                             | 1427 |       |
|              | Lol p 5 1           | 151              | DAYVATLREALRVA   | 3324.1167       | 4.29       | U00106    |        | 1743                            | 1743 |       |
|              | Lol p 5 1           | 156              | TLREALRVIAGTLEV  | 3324.1185       | 4.29       | U00099    |        | 267                             | 267  |       |
|              | Lol p 5 1           | 196              | VDAAYRTAATAANAA  | 3324.1181       | 4.30       | U00106    |        | 383                             | 383  |       |
|              | Lol p 5 1           | 216              | FTVFENTFNNAIKVS  | 3324.1179       | 4.31       | U00099    |        | 87                              | 87   |       |
|              | Lol p 5 1           | 236              | DSYKFIPTLVAAVKQ  | 3324.1165       | 4.32       | U00099    |        | 382                             | 382  |       |
|              | Lol p 5 1           | 236              | DSYKFIPTLVAAVKQ  | 3324.1165       | 4.32       | U00106    |        | 78                              | 78   |       |
| Lol p 5 1    | 246                 | AAVKQYAAKQATAP   | 3324.1177        | 4.33            | U00106     | 43        |        | 43                              |      |       |
| Lol p 5 1    | 261                 | EVKYTVSETALKKAV  | 3324.1178        | 4.34            | U00106     |           | 333    | 333                             |      |       |
| Lol p 5 1    | 271                 | LKKAVTAMSEAEKEA  | 3324.1183        | 4.35            | U00106     |           | 128    | 128                             |      |       |
| Lol p 5 1    | 306                 | PAAAYATATPAAATA  | 3324.1184        | 4.36            | U00106     | 58        |        | 58                              |      |       |
| Lol p 5 1    | 306                 | PAAAYATATPAAATA  | 3324.1184        | 4.36            | U00099     |           | 1637   | 1637                            |      |       |
| Lol p 5 2    | 181                 | AFKIAATAANAAPTIN | 3324.1197        | 4.37            | D00004     |           | 1200   | 1200                            |      |       |
| Lol p 5 2    | 181                 | AFKIAATAANAAPTIN | 3324.1197        | 4.37            | U00106     |           | 887    | 887                             |      |       |
| Lol p 5 2    | 181                 | AFKIAATAANAAPTIN | 3324.1197        | 4.37            | D00070     | 173       |        | 173                             |      |       |
| Lol p 5 2    | 196                 | DKFTVFESAFNKALN  | 3324.1191        | 4.38            | U00106     |           | 97     | 97                              |      |       |
| Lol p 5 2    | 251                 | AALTKAITAMTQAQK  | 3324.1196        | 4.39            | U00099     |           | 998    | 998                             |      |       |
| Canary grass | Pha a 1             | 186              | PNYLALLVKYVDGDD  | 3324.1428       | 4.40       | U00099    | 153    | 132                             | 285  |       |
|              | Pha a 1             | 186              | PNYLALLVKYVDGDD  | 3324.1428       | 4.40       | D00052    |        | 323                             | 323  |       |
|              | Pha a 1             | 186              | PNYLALLVKYVDGDD  | 3324.1428       | 4.40       | D00070    | 147    |                                 | 147  |       |
|              | Pha a 1             | 186              | PNYLALLVKYVDGDD  | 3324.1428       | 4.40       | U00029    | 1340   |                                 | 1340 |       |
|              | Pha a 1             | 221              | SWGAIWRIDTPDKLT  | 3337.0039       | 4.41       | U00106    | 155    |                                 | 155  |       |
|              | Pha a 5             | 101              | DAAYRVAYEAAEGST  | 3324.1443       | 4.42       | U00117    | 70     |                                 | 70   |       |
|              | Pha a 5             | 121              | DAFIAALTEALRVIA  | 3324.1432       | 4.43       | U00029    | 713    |                                 | 713  |       |
|              | Pha a 5             | 121              | DAFIAALTEALRVIA  | 3324.1432       | 4.43       | D00052    |        | 540                             | 540  |       |
|              | Pha a 5             | 126              | ALTEALRVIAAGAFEV | 3324.1437       | 4.43       | D00070    | 427    |                                 | 427  |       |
|              | Pha a 5             | 166              | AAFKAATAANSAPA   | 3324.1441       | 4.44       | U00029    | 2018   |                                 | 2018 |       |
|              | Pha a 5             | 166              | AAFKAATAANSAPA   | 3324.1441       | 4.44       | U00099    |        | 203                             | 203  |       |
|              | Pha a 5             | 181              | NDKFTVFEGAFNKAI  | 3324.1442       | 4.45       | D00052    |        | 400                             | 400  |       |
|              | Pha a 5             | 181              | NDKFTVFEGAFNKAI  | 3324.1442       | 4.45       | U00117    | 93     |                                 | 93   |       |
|              | Pha a 5             | 201              | GAYETYKFIPSELEA  | 3324.1433       | 4.46       | D00052    |        | 247                             | 247  |       |
|              | Pha a 5             | 201              | GAYETYKFIPSELEA  | 3324.1433       | 4.46       | U00029    | 208    |                                 | 208  |       |
|              | Pha a 5             | 201              | GAYETYKFIPSELEA  | 3324.1433       | 4.46       | U00099    | 153    |                                 | 153  |       |
|              | Pha a 5             | 206              | YKFIPSELEAAVKQAY | 3324.1436       | 4.46       | D00070    | 513    | 290                             | 803  |       |
|              | Pha a 5             | 206              | YKFIPSELEAAVKQAY | 3324.1436       | 4.46       | U00099    |        | 57                              | 243  |       |
|              | Pha a 5             | 206              | YKFIPSELEAAVKQAY | 3324.1436       | 4.46       | U00029    | 193    |                                 | 193  |       |
|              | Kentucky blue grass | Poa p 1          | 121              | EPIAAYHFDLSGKAF | 3324.1556  | 4.79      | D00004 | 297                             |      | 297   |
| Poa p 1      |                     | 121              | EPIAAYHFDLSGKAF  | 3324.1556       | 4.79       | U00032    |        | 183                             | 183  |       |
| Poa p 1      |                     | 121              | EPIAAYHFDLSGKAF  | 3324.1556       | 4.79       | U00102    |        | 877                             | 877  |       |
| Poa p 1      |                     | 176              | KGSNPNYLALLVKYV  | 3324.1557       | 4.80       | U00102    |        | 290                             | 290  |       |
| Poa p 1      |                     | 181              | NYLALLVKYVTDGDD  | 3324.1558       | 4.80       | U00102    |        | 80                              | 80   |       |
| Poa p 1      |                     | 191              | DKFTVFEEAFNNAIK  | 3324.1562       | 4.81       | U00102    |        | 183                             | 183  |       |
| Poa p 5      |                     | 51               | QKLMEDINVGFKAAV  | 3324.1580       | 4.82       | U00101    | 317    |                                 | 317  |       |
| Poa p 5      |                     | 51               | QKLMEDINVGFKAAV  | 3324.1580       | 4.82       | U00110    | 283    | 107                             | 390  |       |

Supplemental Table 3. Positive donor/peptide responses

| Category | Organism                | Antigen   | Position | Sequence         | Peptide ID | Region ID | Donor  | Response (SFC/10 <sup>6</sup> ) |      |       |
|----------|-------------------------|-----------|----------|------------------|------------|-----------|--------|---------------------------------|------|-------|
|          |                         |           |          |                  |            |           |        | IFNg                            | IL-5 | Total |
|          |                         | Poa p 5   | 56       | DINVGFKAAVAAAAG  | 3324.1571  | 4.82      | U00106 |                                 | 397  | 397   |
|          |                         | Poa p 5   | 56       | DINVGFKAAVAAAAG  | 3324.1571  | 4.82      | U00115 | 47                              |      | 47    |
|          |                         | Poa p 5   | 56       | DINVGFKAAVAAAAG  | 3324.1571  | 4.82      | U00034 |                                 | 1057 | 1057  |
|          |                         | Poa p 5   | 56       | DINVGFKAAVAAAAG  | 3324.1571  | 4.82      | U00102 | 1183                            |      | 1183  |
|          |                         | Poa p 5   | 61       | FKAAVAAAAGAPPAD  | 3324.1575  | 4.82      | U00032 |                                 | 138  | 138   |
|          |                         | Poa p 5   | 61       | FKAAVAAAAGAPPAD  | 3324.1575  | 4.82      | U00034 |                                 | 327  | 327   |
|          |                         | Poa p 5   | 61       | FKAAVAAAAGAPPAD  | 3324.1575  | 4.82      | U00102 | 230                             |      | 230   |
|          |                         | Poa p 5   | 121      | ATPEAKFDSFVAAFT  | 3324.1570  | 4.83      | U00032 |                                 | 238  | 238   |
|          |                         | Poa p 5   | 121      | ATPEAKFDSFVAAFT  | 3324.1570  | 4.83      | U00115 | 80                              |      | 80    |
|          |                         | Poa p 5   | 121      | ATPEAKFDSFVAAFT  | 3324.1570  | 4.83      | U00102 | 117                             |      | 117   |
|          |                         | Poa p 5   | 131      | VAAFTEALRIIAGVL  | 3324.1576  | 4.84      | U00115 | 117                             |      | 117   |
|          |                         | Poa p 5   | 131      | VAAFTEALRIIAGVL  | 3324.1576  | 4.84      | U00102 | 127                             |      | 127   |
|          |                         | Poa p 5   | 176      | AFKVAATAANAAPAN  | 3324.1578  | 4.85      | U00032 | 127                             | 548  | 675   |
|          |                         | Poa p 5   | 176      | AFKVAATAANAAPAN  | 3324.1578  | 4.85      | U00110 | 100                             |      | 100   |
|          |                         | Poa p 5   | 176      | AFKVAATAANAAPAN  | 3324.1578  | 4.85      | U00034 |                                 | 107  | 107   |
|          |                         | Poa p 5   | 176      | AFKVAATAANAAPAN  | 3324.1578  | 4.85      | U00106 |                                 | 820  | 820   |
|          |                         | Poa p 5   | 176      | AFKVAATAANAAPAN  | 3324.1578  | 4.85      | U00102 | 83                              |      | 83    |
|          |                         | Poa p 5   | 176      | AFKVAATAANAAPAN  | 3324.1578  | 4.85      | U00115 | 77                              |      | 77    |
|          |                         | Poa p 5   | 206      | ESTGGAYDYTKSIPS  | 3324.1583  | 4.86      | U00115 |                                 | 157  | 157   |
|          |                         | Poa p 5   | 211      | AYDITYKSIPSLAAAV | 3324.1579  | 4.86      | U00032 |                                 | 98   | 98    |
|          |                         | Poa p 5   | 211      | AYDITYKSIPSLAAAV | 3324.1579  | 4.86      | U00101 | 163                             |      | 163   |
|          |                         | Poa p 5   | 211      | AYDITYKSIPSLAAAV | 3324.1579  | 4.86      | U00106 |                                 | 1320 | 1320  |
|          |                         | Poa p 5   | 221      | LEAAVKQAYAATIAA  | 3324.1564  | 4.87      | U00115 |                                 | 180  | 180   |
|          |                         | Poa p 5   | 221      | LEAAVKQAYAATIAA  | 3324.1564  | 4.87      | U00102 | 1190                            |      | 1190  |
|          | <b>English plantain</b> | Plal 1    | 21       | HSRNLINELSERMAG  | 3324.1552  | 5.01      | D00004 |                                 | 118  | 118   |
|          |                         | Plal 1    | 21       | HSRNLINELSERMAG  | 3324.1552  | 5.01      | U00072 |                                 | 190  | 190   |
|          |                         | Plal 1    | 21       | HSRNLINELSERMAG  | 3324.1552  | 5.01      | U00102 |                                 | 57   | 57    |
|          |                         | Plal 1    | 76       | IKLVKSSRPDCSEIP  | 3337.0044  | 5.02      | D00004 | 90                              |      | 90    |
|          |                         | Plal 1    | 76       | IKLVKSSRPDCSEIP  | 3337.0044  | 5.02      | U00072 |                                 | 233  | 233   |
|          | <b>Giant ragweed</b>    | Amb t 5   | 1        | MKNIFMLTLFILIIT  | 3324.0099  | 5.03      | D00002 |                                 | 57   | 57    |
|          |                         | Amb t 5   | 1        | MKNIFMLTLFILIIT  | 3324.0099  | 5.03      | D00095 | 77                              |      | 77    |
|          |                         | Amb t 5   | 6        | MLTLFILIITSTIKA  | 3324.0100  | 5.03      | D00007 | 63                              |      | 63    |
|          |                         | Amb t 5   | 6        | MLTLFILIITSTIKA  | 3324.0100  | 5.03      | D00096 | 167                             |      | 167   |
|          |                         | Amb t 5   | 31       | KQEDDGLCYEGTNCG  | 3337.0006  | 5.04      | D00096 | 123                             |      | 123   |
|          |                         | Amb t 5   | 56       | GKYVCYDSKAICNK   | 3337.0007  | 5.05      | D00007 | 47                              |      | 47    |
|          | <b>Russian thistle</b>  | Sal k 1 1 | 81       | EKVKIERLHPYITLY  | 3324.1599  | 5.06      | D00047 |                                 | 260  | 260   |
|          |                         | Sal k 1 1 | 111      | AAEFGTVDSATLIVE  | 3324.1596  | 5.07      | D00047 |                                 | 3003 | 3003  |
|          |                         | Sal k 1 1 | 126      | SDYFVGANLIVSNSA  | 3324.1594  | 5.08      | D00047 |                                 | 920  | 920   |
|          |                         | Sal k 1 1 | 131      | GANLIVSNSAPRPD   | 3324.1601  | 5.08      | D00047 |                                 | 147  | 147   |
|          |                         | Sal k 1 1 | 191      | EGTVDFIFGEARSLY  | 3324.1590  | 5.09      | D00047 | 397                             | 1300 | 1697  |
|          |                         | Sal k 1 1 | 191      | EGTVDFIFGEARSLY  | 3324.1590  | 5.09      | U00106 |                                 | 363  | 363   |
|          |                         | Sal k 1 1 | 196      | FIFGEARSLYLNTEL  | 3324.1591  | 5.09      | D00047 |                                 | 500  | 500   |
|          |                         | Sal k 1 1 | 196      | FIFGEARSLYLNTEL  | 3324.1591  | 5.09      | U00106 |                                 | 133  | 133   |
|          |                         | Sal k 1 1 | 251      | LGRAWFEEARVVSFY  | 3324.1592  | 5.10      | D00047 | 120                             | 1430 | 1550  |
|          |                         | Sal k 1 1 | 256      | FEAARVVSFYCNLSD  | 3324.1593  | 5.10      | D00047 |                                 | 363  | 363   |
|          |                         | Sal k 1 1 | 321      | FTSLEYIEAAKWLLP  | 3324.1589  | 5.11      | D00047 | 310                             | 1433 | 1743  |
|          |                         | Sal k 1 1 | 321      | FTSLEYIEAAKWLLP  | 3324.1589  | 5.11      | U00106 |                                 | 203  | 203   |
|          |                         | Sal k 1 1 | 325      | EYIEAAKWLLPPPKV  | 3324.1600  | 5.11      | D00047 |                                 | 980  | 980   |
|          |                         | Sal k 1 2 | 11       | RTIFFDAYLGTSYVI  | 3324.1602  | 5.12      | D00047 |                                 | 433  | 433   |
|          |                         | Sal k 1 2 | 16       | DAYLGTSYVIVIKEP  | 3324.1603  | 5.12      | D00047 |                                 | 290  | 290   |
|          |                         | Sal k 2   | 171      | KIAAEIAIALLFLRD  | 3324.1606  | 5.13      | D00047 |                                 | 90   | 90    |
|          |                         | Sal k 2   | 176      | IAIALLFLRDAKPEP  | 3324.1608  | 5.13      | D00047 |                                 | 97   | 97    |
|          |                         | Sal k 2   | 261      | SFGILLQLLTARPP   | 3324.1609  | 5.14      | D00047 |                                 | 103  | 103   |
|          |                         | Sal k 3   | 91       | FDLYFSMARGNASLP  | 3324.1653  | 5.15      | D00047 | 343                             |      | 343   |
|          |                         | Sal k 3   | 191      | VIAELKAAGASTIQF  | 3324.1632  | 5.16      | D00047 |                                 | 313  | 313   |
|          |                         | Sal k 3   | 261      | VTAFGFDLVRGTKTL  | 3324.1640  | 5.17      | D00047 |                                 | 73   | 73    |
|          |                         | Sal k 3   | 306      | SLATLQSLESIVGKD  | 3324.1647  | 5.18      | D00047 | 228                             |      | 228   |
|          |                         | Sal k 3   | 341      | TKLDDEIKSWLAFAA  | 3324.1630  | 5.19      | D00047 |                                 | 87   | 87    |
|          |                         | Sal k 3   | 376      | FFSANAALASRKSS   | 3324.1636  | 5.20      | D00047 | 93                              |      | 93    |
|          |                         | Sal k 3   | 621      | GFYLQWAVHSFRITN  | 3324.1625  | 5.21      | D00047 | 193                             | 143  | 337   |

**Supplemental Table 4. HLA class II binding patterns of prevalently recognized epitope regions (IC50 nM)**

| Region ID | Organism                | Source protein | Acc. no. | Pos | Sequence         | Peptide ID | DRB1*0101 | DRB1*0301 | DRB1*0401 | DRB1*0404 | DRB1*0405 | DRB1*0701 | DRB1*0802 | DRB1*0901 | DRB1*1001 |
|-----------|-------------------------|----------------|----------|-----|------------------|------------|-----------|-----------|-----------|-----------|-----------|-----------|-----------|-----------|-----------|
| 1.01      | Alt. rot fungus         | Alt a 1        | P79085   | 6   | IASLFAAAAGLAAAAP | 3324.0015  | 2.0       | 32079     | 9.1       | 5.6       | 1814      | 1007      | 45        | 62        | 12        |
| 1.01      | Alt. rot fungus         | Alt a 1        | P79085   | 11  | AAAGLAAAAPLESRQ  | 3324.0017  | 18        | 919       | 37        | 5.0       | 340       | 532       | 15        | 128       | 15        |
| 1.02      | Alt. rot fungus         | Alt a 1        | P79085   | 111 | KVSDDDITYVATATLP | 3324.0013  | 127       | 642       | 208       | 5875      | 234       | 66        | 151       | 178       | 291       |
| 1.02      | Alt. rot fungus         | Alt a 1        | P79085   | 116 | ITYVATATLPNYCRA  | 3324.0014  | 21        | 5584      | 7.0       | 78        | 14654     | 32        | 10        | 121       | 1.4       |
| 1.03      | Alt. rot fungus         | Alt a 1        | P79085   | 141 | QGVADAYITLVTLPK  | 3324.0011  | 151       | 8348      | 106       | 423       | 175       | 585       | 42        | 749       | 79        |
| 1.03      | Alt. rot fungus         | Alt a 1        | P79085   | 143 | VADAYITLVTLPKSS  | 3324.0016  | 6.5       | 2797      | 6.3       | 5.0       | 34        | 4890      | 7.9       | 315       | 23        |
| 1.08      | Alt. rot fungus         | Alt a 5        | P42037   | 51  | INELIASGSEKLASV  | 3324.0065  | 6.7       | 32        | 78        | 110       | 30        | 312       | 11        | 56        | 61        |
| 1.12      | Alt. rot fungus         | Alt a 6        | Q9HDT3   | 161 | GGRLAFQEFMIVPCE  | 3324.0073  | 238       | 2520      | 708       | 479       | 215       | 476       | 3199      | 782       | 568       |
| 1.20      | Alt. rot fungus         | Alt a 7        | P42058   | 190 | AQGKAFYEAVALAHQ  | 3324.0080  | 56        | 4114      | 60        | 102       | 200       | 176       | 5.1       | 170       | 56        |
| 1.22      | Alt. rot fungus         | Alt a 7        | P42058   | 6   | AIVYYSMYGHKKMA   | 3324.0085  | 5.2       | 16530     | 882       | 248       | 781       | 345       | 25        | 50        | 87        |
| 1.32      | <i>A. fumigatus</i>     | Asp f 17       | O60025   | 91  | SKKDKFVAANAGGTV  | 3324.0212  | 3.6       | 40660     | 206       | 1107      | 91        | 35        | 50        | 12        | 18        |
| 1.38      | <i>C. herbarum</i>      | Cl a 5         | P42039   | 6   | AFLLGLAGNSSPSA   | 3324.0576  | 0.96      | 50000     | 7.5       | 683       | 900       | 21427     | 86        | 14        | 0.92      |
| 1.41      | <i>C. herbarum</i>      | Cl a 6         | P42040   | 161 | GGRLAFQEFMIVPSG  | 3324.0588  | 486       | 5286      | 549       | 820       | 952       | 393       | 42        | 63        | 47        |
| 1.48      | <i>C. herbarum</i>      | Cl a 8         | PoCoY5   | 101 | QIDAFIANAGATADS  | 3324.0601  | 1.7       | 150       | 6716      | 6451      | 6807      | 1186      | 11        | 0.62      | 58        |
| 1.49      | <i>C. herbarum</i>      | Cl a 8         | PoCoY5   | 151 | GTGSLVITASMSGHI  | 3324.0603  | 49        | 3530      | 6.6       | 76        | 162       | 6.3       | 498       | 202       | 74        |
| 1.50      | <i>C. herbarum</i>      | Cl a 8         | PoCoY5   | 181 | GCIHMARSLANEWRD  | 3324.0602  | 24        | 2757      | 33        | 7.8       | 128       | 19        | 94        | 152       | 8.9       |
| 1.51      | <i>C. herbarum</i>      | Cl a 8         | PoCoY5   | 236 | KELKGAYVVFASDAS  | 3324.0598  | 4.8       | 2317      | 10        | 5806      | 6569      | 174       | 16        | 4.5       | 8.6       |
| 1.54      | <i>P. chrysogenum</i>   | Pen ch 13      | Q9URR2   | 101 | PAVKYIEPDMIVNAT  | 3324.1304  | 128       | 64        | 120       |           | 233       | 69        | 6101      | 342       | 10        |
| 1.57      | <i>P. chrysogenum</i>   | Pen ch 13      | Q9URR2   | 271 | GIFLSVAAGNEAENA  | 3324.1303  | 6.9       | 3592      | 28        | 63        | 942       | 90        | 54        | 57        | 4.0       |
| 1.63      | <i>P. chrysogenum</i>   | Pen ch 18      | Q9P8G3   | 226 | KFGVAKKANVYAVKV  | 3324.1330  | 18        | 9196      | 616       | 108       | 4648      | 15        | 2.6       | 79        | 31        |
| 1.64      | <i>P. chrysogenum</i>   | Pen ch 18      | Q9P8G3   | 291 | LDLAVNAADVAGIHF  | 3324.1331  | 58        | 780       | 521       | 78        | 1356      | 510       | 135       | 336       | 830       |
| 2.15      | Cat epithelia           | Fel d 1 1      | P30438   | 41  | DEYVEQVAQYKALPV  | 3324.1049  | 4.8       | 9240      | 41        | 1246      | 795       | 62        | 208       | 107       | 5.8       |
| 2.15      | Cat epithelia           | Fel d 1 1      | P30438   | 46  | QVAQYKALPVVLENA  | 3324.1051  | 1.4       | 19151     | 90        | 59        | 37        | 77        | 90        | 37        | 10        |
| 2.16      | Cat epithelia           | Fel d 1 1      | P30438   | 78  | NALSVDLKIYTSPLC  | 3324.1050  | 89        | 320       | 169       | 97        | 445       | 174       | 33        | 591       | 40        |
| 2.17      | Cat epithelia           | Fel d 1 2      | P30440   | 21  | AETCFPIFYDVFVAFA | 3324.1056  | 766       | 71        | 442       | 271       | 556       | 1112      | 1213      | 2567      | 265       |
| 2.17      | Cat epithelia           | Fel d 1 2      | P30440   | 26  | IFYDVFVAANGNEL   | 3324.1052  | 14        | 5343      | 377       | 183       | 6079      | 114       | 25        | 56        | 81        |
| 2.18      | Cat epithelia           | Fel d 1 2      | P30440   | 36  | NGNELLLDLSLTKVN  | 3324.1055  | 663       | 19        | 451       | 102       | 926       | 945       | 425       | 408       | 415       |
| 2.30      | <i>D. farinae</i>       | Der f 1        | A1YW11   | 131 | GSCWAFSGVAATESA  | 3324.0670  | 42        | 38891     | 23        | 1616      | 238       | 216       | 84        | 47        | 31        |
| 2.30      | <i>D. farinae</i>       | Der f 1        | A1YW11   | 136 | FSGVAATESAYLAYR  | 3324.0666  | 8.8       | 5135      | 62        | 482       | 507       | 17        | 78        | 20        | 34        |
| 2.56      | <i>D. pteronyssinus</i> | Der p 1        | P08176   | 131 | SCWAFSGVAATESAY  | 3324.0832  | 11        | 25798     | 49        | 267       | 70        | 8721      | 29        | 0.39      |           |
| 2.56      | <i>D. pteronyssinus</i> | Der p 1        | P08176   | 136 | SGVAATESAYLAYRN  | 3324.0829  | 9.6       | 2816      | 127       | 903       | 33        | 9532      | 66        | 7.7       |           |
| 2.57      | <i>D. pteronyssinus</i> | Der p 1        | P08176   | 176 | RGIEYIQHNGVVQES  | 3324.0831  | 223       | 1145      | 84        | 341       | 123       | 783       | 246       | 61        |           |
| 2.58      | <i>D. pteronyssinus</i> | Der p 1        | P08176   | 226 | REALAQTHSAIAVII  | 3324.0840  | 11        | 4216      | 25        | 962       | 1.8       | 963       | 4.2       | 61        |           |
| 2.73      | <i>D. pteronyssinus</i> | Der p 4        | Q9Y197   | 86  | NKAGVRIYVDIVLNI  | 3324.0981  | 951       | 275       | 332       | 93        | 181       | 919       | 376       | 4205      | 73        |
| 2.73      | <i>D. pteronyssinus</i> | Der p 4        | Q9Y197   | 96  | IVLNHMTGAQSGKGT  | 3324.0987  | 1.2       | 14905     | 6688      | 27        | 5537      | 208       | 94        | 44        | 14        |
| 2.75      | <i>D. pteronyssinus</i> | Der p 4        | Q9Y197   | 251 | IEFRFYKEITNVFRG  | 3324.0976  | 7.6       | 516       | 14        | 583       | 75        | 72        | 1.9       | 45        | 12        |
| 2.77      | <i>D. pteronyssinus</i> | Der p 4        | Q9Y197   | 321 | AFMLAWNYGVPVMS   | 3324.0977  | 1.6       | 49        | 82        | 628       | 66        | 12        | 5.6       | 5.7       | 54        |
| 2.79      | <i>D. pteronyssinus</i> | Der p 4        | Q9Y197   | 381 | EHRWREIYNMVKFRM  | 3324.0986  | 131       | 706       | 170       | 252       | 331       | 295       | 41        | 1010      | 92        |
| 2.79      | <i>D. pteronyssinus</i> | Der p 4        | Q9Y197   | 386 | EIYNMVKFRMIAGQE  | 3324.0978  | 27        | 665       | 317       | 84        | 79        | 8.9       | 6.2       | 120       | 11        |
| 2.80      | <i>D. pteronyssinus</i> | Der p 4        | Q9Y197   | 411 | YQIAFSRGNRAFIAI  | 3324.0980  | 1.7       | 117       | 14        | 27        | 1.2       | 8491      | 2.5       | 1.7       |           |
| 2.80      | <i>D. pteronyssinus</i> | Der p 4        | Q9Y197   | 416 | SRGNRAFIAINLQKN  | 3324.0974  | 24        | 615       | 92        | 415       | 160       | 118       | 69        | 38        | 4.1       |
| 2.81      | <i>D. pteronyssinus</i> | Der p 4        | Q9Y197   | 476 | VYGHDEFDAFVAYHI  | 3324.0975  | 19        | 8516      | 1172      | 1970      | 667       | 0.81      | 3.7       | 11        | 15        |
| 2.81      | <i>D. pteronyssinus</i> | Der p 4        | Q9Y197   | 482 | FDAFVAYHIGARIVS  | 3324.0971  | 0.75      | 7274      | 248       | 1425      | 466       | 0.73      | 1.1       | 1.2       | 38        |
| 3.01      | Alder                   | Aln g 1        | P38948   | 11  | PSVIPAARLFKAFIL  | 3324.0004  | 13        | 56        | 666       | 444       | 221       | 5.0       | 55        | 38        | 1.1       |
| 3.01      | Alder                   | Aln g 1        | P38948   | 16  | AARLFKAFILDGDKL  | 3324.0003  | 19        | 1069      | 525       | 706       | 19        | 9.6       | 224       | 272       | 3.3       |
| 3.02      | Alder                   | Aln g 1        | P38948   | 111 | GGSILKISNKFHTKG  | 3324.0007  | 19        | 32        | 84        | 12        | 126       | 113       | 5.3       | 302       | 42        |
| 3.06      | Birch                   | Bet v 1        | O23754   | 96  | LEKISNEIKIVATPD  | 3324.0353  | 182       | 1362      | 5260      | 269       | 1693      | 205       | 244       | 875       | 595       |
| 3.07      | Birch                   | Bet v 1        | O23754   | 111 | GGSILKISNKHHTKG  | 3324.0352  | 12        | 78        | 140       | 92        | 87        | 558       | 6.2       | 92        | 393       |
| 3.13      | Birch                   | Bet v 6        | Q9FUW6   | 206 | RTLNKIVYIKPAKNI  | 3324.0387  | 4.5       | 979       | 74        | 13        | 156       | 19        | 1.5       | 9.2       | 7.0       |
| 3.13      | Birch                   | Bet v 6        | Q9FUW6   | 211 | IVYIKPAKNIYSFNE  | 3324.0386  | 2.0       | 504       | 5.1       | 7.8       | 63        | 14        | 2.8       | 4.4       | 2.0       |
| 3.17      | Cypress                 | Cha o 1        | Q96385   | 86  | ERSLWIIFSKNLNIK  | 3324.0517  | 1.3       | 57        | 56        | 14        | 17        | 4.6       | 7.4       | 15        | 84        |
| 3.17      | Cypress                 | Cha o 1        | Q96385   | 96  | NLNKLNMPLYIAGN   | 3324.0523  | 528       | 15393     | 27672     | 3563      | 3490      | 544       | 159       | 795       | 878       |
| 3.18      | Cypress                 | Cha o 1        | Q96385   | 211 | NHFFNHKKVMLLGH   | 3324.0521  | 65        | 6873      | 208       | 277       | 157       | 12        | 22        | 105       | 124       |
| 3.21      | Cypress                 | Cup a 1        | Q9SCG9   | 66  | KALWIIFSQNMNIKL  | 3324.0604  | 831       | 4445      | 294       | 404       | 1484      | 153       | 1898      | 222       | 88        |
| 3.21      | Cypress                 | Cup a 1        | Q9SCG9   | 71  | IFSQNMNIKLQMPLY  | 3324.0607  | 106       | 86        | 212       | 245       | 433       | 536       | 30        | 284       | 175       |
| 3.23      | Cypress                 | Cup a 1        | Q9SCG9   | 316 | EDTNIYNSNEAFKVE  | 3324.0606  | 25        | 263       | 617       | 3139      | 4994      | 46        | 6524      | 48        | 580       |
| 3.24      | Cypress                 | Cup s 1        | Q9M4S2   | 86  | EKALWIIFSQNMNIKL | 3324.0615  | 64        | 878       | 312       | 196       | 427       | 173       | 875       | 82        | 45        |
| 3.24      | Cypress                 | Cup s 1        | Q9M4S2   | 91  | IIFSQNMNIKLKMPL  | 3324.0618  | 115       | 568       | 6397      | 6342      | 8675      | 115       | 65        | 958       | 593       |
| 3.24      | Cypress                 | Cup s 1        | Q9M4S2   | 96  | NMNIKLKMPLYVAGH  | 3324.0624  | 7.6       | 4211      | 4828      | 998       | 2537      | 6151      | 21        | 243       | 125       |
| 3.26      | Cypress                 | Cup s 1        | Q9M4S2   | 211 | NHFFNHKKVMLLGH   | 3324.0616  | 24        | 22741     | 71        | 2257      | 573       | 3.4       | 5.7       | 66        | 14        |
| 3.40      | White oak               | Que a 1        | B6RQS2   | 11  | ASVIPPARLFKAFVL  | 3324.1587  | 29        | 778       | 15        | 43        | 92        | 1.5       | 82        | 15        | 0.69      |
| 3.40      | White oak               | Que a 1        | B6RQS2   | 16  | PARLFKAFVLDSNDL  | 3324.1585  | 98        | 92        | 16        | 15        | 28        | 14        | 259       | 61        | 3.9       |
| 3.40      | White oak               | Que a 1        | B6RQS2   | 21  | KAFVLDSNDLIPKVV  | 3324.1588  | 24        | 7.6       | 4.9       | 49        | 39        | 40        | 287       | 74        | 25        |

**Supplemental Table 4. HLA class II binding patterns of prevalently recognized epitope regions (IC50 nM)**

| Region ID | Organism            | Source protein | Acc. no. | Pos | Sequence         | Peptide ID | DRB1*0101 | DRB1*0301 | DRB1*0401 | DRB1*0404 | DRB1*0405 | DRB1*0701 | DRB1*0802 | DRB1*0901 | DRB1*1001 |
|-----------|---------------------|----------------|----------|-----|------------------|------------|-----------|-----------|-----------|-----------|-----------|-----------|-----------|-----------|-----------|
| 3.41      | White oak           | Que a 1        | B6RQS2   | 141 | ASEVFKAVEAYLVAH  | 3324.1584  | 0.95      | 778       | 49        | 7871      | 5866      | 17        | 19        | 6.7       | 1.6       |
| 4.06      | Orchard grass       | Dac g 1        | Q7XAX7   | 181 | PNYLALLVKYVDGDG  | 3324.0655  | 7.8       | 11727     | 315       | 1084      | 72        | 114       | 47        | 72        | 11        |
| 4.07      | Orchard grass       | Dac g 2        | Q41183   | 11  | GSDEKNLALSISKYK  | 3324.0657  | 110       | 98        | 2656      | 3379      | 3409      | 439       | 25        | 851       | 149       |
| 4.07      | Orchard grass       | Dac g 2        | Q41183   | 16  | NLALSIKYNKEGDSM  | 3324.0658  | 768       | 275       | 2078      | 2339      | 1425      | 1853      | 37        | 2776      | 109       |
| 4.09      | Orchard grass       | Dac g 4        | P82946   | 1   | DIYNYMEPYVSKVDP  | 3324.0663  | 13        | 50000     | 102       | 22853     | 5897      | 23453     | 311       | 344       | 9.4       |
| 4.13      | Rye grass           | Lol p 1        | P14946   | 176 | KASNPNYLAILVKYV  | 3324.1135  | 3.0       | 14228     | 221       | 3.0       | 124       | 7.4       | 2.0       | 34        | 11        |
| 4.14      | Rye grass           | Lol p 11       | Q7M1X5   | 111 | RYANPIAFFRKEPLK  | 3324.1138  | 19        | 1487      | 255       | 464       | 1961      | 382       | 25        | 240       | 62        |
| 4.14      | Rye grass           | Lol p 11       | Q7M1X5   | 116 | IAFFRKEPLKECGGI  | 3337.0029  | 71        | 1218      | 298       | 3198      | 413       | 3495      | 6.8       | 953       | 280       |
| 4.15      | Rye grass           | Lol p 2        | P14947   | 51  | DGVWEIKSDKPLKGP  | 3324.1139  | 1394      | 84        | 67        | 262       | 9793      | 30936     | 462       | 35386     | 8804      |
| 4.15      | Rye grass           | Lol p 2        | P14947   | 56  | IKSDKPLKGFNFRF   | 3324.1140  | 666       | 2270      | 710       | 5959      | 8878      | 1109      | 3400      | 2041      | 573       |
| 4.16      | Rye grass           | Lol p 2        | P14947   | 76  | MRNVFDDVVPADFVKV | 3337.0030  | 707       | 22        | 788       | 5700      | 1650      | 443       | 535       | 9626      | 705       |
| 4.17      | Rye grass           | Lol p 3        | P14948   | 11  | SDAKTLVLNIKYTRP  | 3324.1142  | 1552      | 283       | 9616      | 1376      | 14819     | 3764      | 65        | 22025     | 4945      |
| 4.18      | Rye grass           | Lol p 3        | P14948   | 51  | LWEVKSAKPLTGPMN  | 3337.0031  | 91        | 475       | 585       | 157       | 7244      | 360       | 57        | 836       | 99        |
| 4.19      | Rye grass           | Lol p 3        | P14948   | 76  | NVFDEVIPTAFTVYGK | 3324.1141  | 292       | 1398      | 1374      | 4295      | 4254      | 282       | 5203      | 2919      | 819       |
| 4.25      | Rye grass           | Lol p 5 1      | Q40237   | 71  | LIEKINAGFKAAVAA  | 3324.1175  | 36        | 190       | 484       | 341       | 3095      | 557       | 343       | 60        | 26        |
| 4.29      | Rye grass           | Lol p 5 1      | Q40237   | 151 | DAYVATLREALRVIA  | 3324.1167  | 10        | 577       | 98        | 996       | 837       | 13        | 246       | 72        | 8.5       |
| 4.29      | Rye grass           | Lol p 5 1      | Q40237   | 156 | TLTEALRVIAGTLEV  | 3324.1185  | 47        | 1223      | 110       | 103       | 6389      | 14        | 187       | 69        | 33        |
| 4.32      | Rye grass           | Lol p 5 1      | Q40237   | 236 | DSYKFIPTLVAAVKQ  | 3324.1165  | 1.1       | 1654      | 3.9       | 6042      | 8523      | 16        | 6.1       | 6.1       | 4.7       |
| 4.36      | Rye grass           | Lol p 5 1      | Q40237   | 306 | PAAAYATATPAAATA  | 3324.1184  | 0.60      | 11254     | 1.0       | 10        | 568       | 161       | 2.5       | 4.7       | 1.3       |
| 4.37      | Rye grass           | Lol p 5 2      | Q40240   | 181 | AFKIAATAANAAPT   | 3324.1197  | 1.7       | 2824      | 0.75      | 2.1       | 586       | 11        | 3.4       | 8.4       | 0.45      |
| 4.40      | Canary grass        | Pha a 1        | Q41260   | 186 | PNYLALLVKYVDGDG  | 3324.1428  | 6.1       | 12592     | 1032      | 650       | 42        | 173       | 42        | 82        | 21        |
| 4.43      | Canary grass        | Pha a 5        | P56164   | 121 | DAFIAALTEALRVIA  | 3324.1432  | 1.5       | 21        | 7.9       | 4.5       | 2.4       | 1.1       | 66        | 6.8       | 0.37      |
| 4.43      | Canary grass        | Pha a 5        | P56164   | 126 | ALTEALRVIAGAFEV  | 3324.1437  | 19        | 3994      | 6712      | 101       | 666       | 8.4       | 60        | 71        | 28        |
| 4.44      | Canary grass        | Pha a 5        | P56164   | 166 | AAFKIAATAANSAPA  | 3324.1441  | 0.62      | 1366      | 0.96      | 1.3       | 16        | 6.8       | 1.7       | 2.9       | 0.91      |
| 4.45      | Canary grass        | Pha a 5        | P56164   | 181 | NDKFTVFEGAFNKAI  | 3324.1442  | 13        | 7870      | 47        | 71        | 96        | 8.4       | 166       | 24        | 1.6       |
| 4.46      | Canary grass        | Pha a 5        | P56164   | 201 | GAYETYKFIPLSLEAA | 3324.1433  | 1.5       | 2291      | 5.6       | 722       | 5901      | 15        | 19        | 13        | 2.3       |
| 4.46      | Canary grass        | Pha a 5        | P56164   | 206 | YKFIPSLAAVVKQAY  | 3324.1436  | 1.3       | 532       | 4.2       | 54        | 6911      | 21        | 60        | 25        | 9.4       |
| 4.79      | Kentucky blue grass | Poa p 1        | Q9ZP03   | 121 | EPIAAYHFDLSGKAF  | 3324.1556  | 3.0       | 2447      | 4.7       | 460       | 6859      | 28        | 65        | 7.8       | 30        |
| 4.82      | Kentucky blue grass | Poa p 5        | Q9FFP0   | 51  | QKLMEDINVGFKAAV  | 3324.1580  | 15        | 3.4       | 105       | 6410      | 6660      | 474       | 315       | 58        | 195       |
| 4.82      | Kentucky blue grass | Poa p 5        | Q9FFP0   | 56  | DINVGFKAAVAAAAG  | 3324.1571  | 1.5       | 7971      | 13        | 53        | 615       | 37        | 4.8       | 8.9       | 7.3       |
| 4.82      | Kentucky blue grass | Poa p 5        | Q9FFP0   | 61  | FKAAVAAAAGAPPAD  | 3324.1575  | 2.2       | 50000     | 100       | 1254      | 11606     | 101       | 43        | 5.6       | 13        |
| 4.83      | Kentucky blue grass | Poa p 5        | Q9FFP0   | 121 | ATPEAKFDSFVAFT   | 3324.1570  | 102       | 4730      | 59        | 1256      | 726       | 98        | 240       | 65        | 31        |
| 4.84      | Kentucky blue grass | Poa p 5        | Q9FFP0   | 131 | VAAFTALRIAGVL    | 3324.1576  | 59        | 4940      | 328       | 348       | 1013      | 41        | 42        | 101       | 83        |
| 4.85      | Kentucky blue grass | Poa p 5        | Q9FFP0   | 176 | AFKVAATAANAAPAN  | 3324.1578  | 14        | 43392     | 10        | 6066      | 398       | 52        | 49        | 73        | 3.2       |
| 4.86      | Kentucky blue grass | Poa p 5        | Q9FFP0   | 206 | ESTGGAYDTYKSIPS  | 3324.1583  | 170       | 1197      | 54        | 4381      | 7674      | 519       | 189       | 514       | 56        |
| 4.86      | Kentucky blue grass | Poa p 5        | Q9FFP0   | 211 | AYDTYKSIPSLAAV   | 3324.1579  | 1.7       | 4684      | 2.5       | 65        | 5999      | 57        | 17        | 39        | 4.1       |
| 4.87      | Kentucky blue grass | Poa p 5        | Q9FFP0   | 221 | LEAAVKQAYAAATIAA | 3324.1564  | 4.1       | 5747      | 163       | 300       | 3110      | 1.8       | 317       | 5.3       | 147       |
| 5.09      | Russian thistle     | Sal k 1 1      | Q17ST3   | 191 | EGTVDFIFGEARSLY  | 3324.1590  | 1.5       | 11        | 419       | 21        | 2888      | 14        | 105       | 9.1       | 278       |
| 5.11      | Russian thistle     | Sal k 1 1      | Q17ST3   | 321 | FITSLEYIEAAKWLLP | 3324.1589  | 105       | 315       | 621       | 823       | 477       | 177       | 528       | 382       | 98        |

Supplemental Table 4. HLA class II binding patterns of prevalently re

| Region ID | Organism                | Source protein | Acc. no. | Pos | Sequence         | Peptide ID | DRB1*1101 | DRB1*1201 | DRB1*1302 | DRB1*1501 | DRB1*1602 | DRB3*0101 | DRB3*0202 | DRB4*0101 | DRB5*0101 |
|-----------|-------------------------|----------------|----------|-----|------------------|------------|-----------|-----------|-----------|-----------|-----------|-----------|-----------|-----------|-----------|
| 1.01      | Alt. rot fungus         | Alt a 1        | P79085   | 6   | IASLFAAAGLAAAAP  | 3324.0015  | 1262      | 10995     | 3251      | 11        | 871       | 46138     | 4645      | 301       | 746       |
| 1.01      | Alt. rot fungus         | Alt a 1        | P79085   | 11  | AAAGLAAAAPLESRQ  | 3324.0017  | 924       | 17178     | 5638      | 148       | 956       | 50000     | 1043      | 28        | 135       |
| 1.02      | Alt. rot fungus         | Alt a 1        | P79085   | 111 | KVSDDDITYVATATLP | 3324.0013  | 883       | 7666      | 52        | 478       | 856       | 6000      | 5275      | 1159      | 1756      |
| 1.02      | Alt. rot fungus         | Alt a 1        | P79085   | 116 | ITYVATATLPNYCRA  | 3324.0014  | 16        | 994       | 1012      | 1232      | 504       | 1325      | 8.7       | 4417      | 68        |
| 1.03      | Alt. rot fungus         | Alt a 1        | P79085   | 141 | QGVADAYITLVTLPK  | 3324.0011  | 90        | 7907      | 3934      | 86        | 3403      | 3672      | 3832      | 627       | 81        |
| 1.03      | Alt. rot fungus         | Alt a 1        | P79085   | 143 | VADAYITLVTLPKSS  | 3324.0016  | 16        | 5300      | 5151      | 122       | 436       | 13047     | 324       | 58        | 8.3       |
| 1.08      | Alt. rot fungus         | Alt a 5        | P42037   | 51  | INELLASGSEKLASV  | 3324.0065  | 1312      | 8620      | 4.1       | 14        | 237       | 3736      | 8.5       | 193       | 138       |
| 1.12      | Alt. rot fungus         | Alt a 6        | Q9HDT3   | 161 | GGRLAFQEFMIVPCE  | 3324.0073  | 6086      | 3836      | 178       | 344       | 3918      | 12846     | 2123      | 24        | 2781      |
| 1.20      | Alt. rot fungus         | Alt a 7        | P42058   | 190 | AQGKAFYEAVALAHQ  | 3324.0080  | 29        | 17697     | 3652      | 1230      | 2135      | 32587     | 3230      | 548       | 38        |
| 1.22      | Alt. rot fungus         | Alt a 7        | P42058   | 6   | AIVYYSMYGHKKMA   | 3324.0085  | 82        | 1639      | 191       | 1.1       | 491       | 21576     | 2686      | 186       | 4.3       |
| 1.32      | <i>A. fumigatus</i>     | Asp f 17       | O60025   | 91  | SKKDKFVAANAGGTV  | 3324.0212  | 716       | 50000     | 0.35      | 1167      | 350       | 203       | 783       | 6746      | 129       |
| 1.38      | <i>C. herbarum</i>      | Cl a h 5       | P42039   | 6   | AFLLGLAGNSSPSA   | 3324.0576  | 207       | 674       | 48        | 67        | 115       | 50000     | 29        | 98        | 363       |
| 1.41      | <i>C. herbarum</i>      | Cl a h 6       | P42040   | 161 | GGRLAFQEFMIVPSG  | 3324.0588  | 1050      | 7350      | 7.1       | 3552      | 380       | 8985      | 1087      | 4.0       | 3599      |
| 1.48      | <i>C. herbarum</i>      | Cl a h 8       | PoCoY5   | 101 | QIDAFIANAGATADS  | 3324.0601  | 357       | 14150     | 0.79      | 146       | 14        | 31        | 3.5       | 920       | 3843      |
| 1.49      | <i>C. herbarum</i>      | Cl a h 8       | PoCoY5   | 151 | GTGSLVITASMGGHI  | 3324.0603  | 262       | 1558      | 0.52      | 71        | 99        | 5715      | 1554      | 594       | 3279      |
| 1.50      | <i>C. herbarum</i>      | Cl a h 8       | PoCoY5   | 181 | GCIHMARSLANEWRD  | 3324.0602  | 38        | 402       | 77        | 52        | 186       | 3902      | 61        | 270       | 122       |
| 1.51      | <i>C. herbarum</i>      | Cl a h 8       | PoCoY5   | 236 | KELKGAYVVFASDAS  | 3324.0598  | 702       | 1169      | 106       | 71        | 36        | 90        | 696       | 8.3       | 904       |
| 1.54      | <i>P. chrysogenum</i>   | Pen ch 13      | Q9URR2   | 101 | PAVKYIEPDMIVNAT  | 3324.1304  | 539       | 5431      | 23        | 64        | 515       | 1413      | 926       | 4.9       | 363       |
| 1.57      | <i>P. chrysogenum</i>   | Pen ch 13      | Q9URR2   | 271 | GIFLSVAAGNEAENA  | 3324.1303  | 663       | 26989     | 70        | 227       | 70        | 10285     | 96        | 107       | 75        |
| 1.63      | <i>P. chrysogenum</i>   | Pen ch 18      | Q9P8G3   | 226 | KFGVAKKANVYAVKV  | 3324.1330  | 39        | 1160      | 45        | 61        | 399       | 19072     | 1165      | 36        | 38        |
| 1.64      | <i>P. chrysogenum</i>   | Pen ch 18      | Q9P8G3   | 291 | LDLAVNAADVAGIHF  | 3324.1331  | 5469      | 3112      | 1.2       | 1247      | 6275      | 56        | 10        | 4.6       | 19692     |
| 2.15      | Cat epithelia           | Fel d 1 1      | P30438   | 41  | DEYVEQVAQYKALPV  | 3324.1049  | 779       | 76        | 644       | 8.3       | 99        | 3223      | 425       | 2106      | 15        |
| 2.15      | Cat epithelia           | Fel d 1 1      | P30438   | 46  | QVAQYKALPVVLENA  | 3324.1051  | 499       | 114       | 1116      | 19        | 101       | 7529      | 1007      | 1739      | 902       |
| 2.16      | Cat epithelia           | Fel d 1 1      | P30438   | 78  | NALSVDLKIYTSPLC  | 3324.1050  | 166       | 780       | 325       | 73        | 627       | 287       | 2461      | 157       | 1112      |
| 2.17      | Cat epithelia           | Fel d 1 2      | P30440   | 21  | AETCFPIFYDVFVAFA | 3324.1056  | 7993      | 738       | 40        | 688       | 1173      | 240       | 5759      | 2410      | 17988     |
| 2.17      | Cat epithelia           | Fel d 1 2      | P30440   | 26  | IFYDVFVAANGNEL   | 3324.1052  | 5450      | 6429      | 35        | 284       | 555       | 889       | 941       | 50000     | 506       |
| 2.18      | Cat epithelia           | Fel d 1 2      | P30440   | 36  | NGNELLLDLSLTKVN  | 3324.1055  | 6739      | 1806      | 208       | 840       | 2471      | 103       | 1870      | 406       | 1633      |
| 2.30      | <i>D. farinae</i>       | Der f 1        | A1YW11   | 131 | GSCWAFSGVAATESA  | 3324.0670  | 11595     | 32537     | 38812     | 178       | 501       | 50000     | 524       | 38259     | 3721      |
| 2.30      | <i>D. farinae</i>       | Der f 1        | A1YW11   | 136 | FSGVAATESAYLAYR  | 3324.0666  | 4770      | 32626     | 958       | 68        | 65        | 50000     | 13194     | 8441      | 823       |
| 2.56      | <i>D. pteronyssinus</i> | Der p 1        | P08176   | 131 | SCWAFSGVAATESAY  | 3324.0832  | 563       | 15767     | 50000     | 827       | 70        | 50000     | 615       | 3875      | 503       |
| 2.56      | <i>D. pteronyssinus</i> | Der p 1        | P08176   | 136 | SGVAATESAYLAYRN  | 3324.0829  | 647       | 12480     | 1342      | 52        | 110       | 50000     | 2256      | 454       | 611       |
| 2.57      | <i>D. pteronyssinus</i> | Der p 1        | P08176   | 176 | RGIEYIQHNGVVQES  | 3324.0831  | 810       | 654       | 71        | 178       | 384       | 50000     | 1020      | 223       | 3872      |
| 2.58      | <i>D. pteronyssinus</i> | Der p 1        | P08176   | 226 | REALAQTHSAIAVVI  | 3324.0840  | 453       | 1179      | 13        | 13        | 124       | 50000     | 3764      | 438       | 2201      |
| 2.73      | <i>D. pteronyssinus</i> | Der p 4        | Q9Y197   | 86  | NKAGVRIYVDIVLNI  | 3324.0981  | 2403      | 2559      | 23        | 70        | 94        | 116       | 4601      | 113       | 7898      |
| 2.73      | <i>D. pteronyssinus</i> | Der p 4        | Q9Y197   | 96  | IVLNHMTGAQSGKGT  | 3324.0987  | 365       | 5198      | 215       | 1386      | 4775      | 50000     | 236       | 118       | 799       |
| 2.75      | <i>D. pteronyssinus</i> | Der p 4        | Q9Y197   | 251 | IEFRFYKEITNVFRG  | 3324.0976  | 700       | 10622     | 79        | 3.9       | 14        | 69        | 3489      | 463       | 15        |
| 2.77      | <i>D. pteronyssinus</i> | Der p 4        | Q9Y197   | 321 | AFMLAWNYGVPVMS   | 3324.0977  | 155       | 903       | 324       | 6.5       | 9.2       | 855       | 7.2       | 25        | 25        |
| 2.79      | <i>D. pteronyssinus</i> | Der p 4        | Q9Y197   | 381 | EHRWREIYNMVKFRM  | 3324.0986  | 64        | 87        | 306       | 105       | 170       | 5036      | 1745      | 48        | 5.4       |
| 2.79      | <i>D. pteronyssinus</i> | Der p 4        | Q9Y197   | 386 | EIYNMVKFRMIAGQE  | 3324.0978  | 9.4       | 109       | 200       | 38        | 75        | 6603      | 1665      | 163       | 285       |
| 2.80      | <i>D. pteronyssinus</i> | Der p 4        | Q9Y197   | 411 | YQIAFSRGNRAFI    | 3324.0980  | 55        | 881       | 0.15      | 1.7       | 24        | 1125      | 6.1       | 4.9       | 9.4       |
| 2.80      | <i>D. pteronyssinus</i> | Der p 4        | Q9Y197   | 416 | SRGNRAFIANLQKN   | 3324.0974  | 1145      | 3589      | 6.1       | 29        | 114       | 1497      | 6.0       | 3.7       | 52        |
| 2.81      | <i>D. pteronyssinus</i> | Der p 4        | Q9Y197   | 476 | VYVGHDEFDAFVAYHI | 3324.0975  | 68        | 1340      | 122       | 6.3       | 281       | 1238      | 2680      | 107       | 39        |
| 2.81      | <i>D. pteronyssinus</i> | Der p 4        | Q9Y197   | 482 | FDAFVAYHIGARIVS  | 3324.0971  | 37        | 241       | 2.5       | 0.46      | 16        | 5339      | 19        | 743       | 1.6       |
| 3.01      | Alder                   | Aln g 1        | P38948   | 11  | PSVIPAARLFKAFIL  | 3324.0004  | 30        | 831       | 1054      | 1.5       | 150       | 1657      | 2038      | 67        | 213       |
| 3.01      | Alder                   | Aln g 1        | P38948   | 16  | AARLFKAFILDGDKL  | 3324.0003  | 3827      | 987       | 12310     | 4.2       | 354       | 75        | 4320      | 30        | 57        |
| 3.02      | Alder                   | Aln g 1        | P38948   | 111 | GGSILKISNKFHTKG  | 3324.0007  | 11        | 1272      | 606       | 2.0       | 606       | 13748     | 3140      | 66        | 15        |
| 3.06      | Birch                   | Bet v 1        | O23754   | 96  | LEKISNEIKIVATPD  | 3324.0353  | 137       | 2320      | 48        | 318       | 425       | 4859      | 779       | 320       | 1637      |
| 3.07      | Birch                   | Bet v 1        | O23754   | 111 | GGSILKISNKHHTKG  | 3324.0352  | 15        | 1192      | 28        | 4.6       | 323       | 4855      | 5846      | 202       | 36        |
| 3.13      | Birch                   | Bet v 6        | Q9FUW6   | 206 | RTLNKIVYIKPAKNI  | 3324.0387  | 44        | 420       | 0.84      | 28        | 146       | 530       | 16        | 4.6       | 24        |
| 3.13      | Birch                   | Bet v 6        | Q9FUW6   | 211 | IVYIKPAKNIYSFNE  | 3324.0386  | 14        | 44        | 2.8       | 5.8       | 46        | 268       | 2.4       | 1.1       | 18        |
| 3.17      | Cypress                 | Cha o 1        | Q96385   | 86  | ERSLWIIFSKNLNIK  | 3324.0517  | 19        | 93        | 0.43      | 1.3       | 25        | 1218      | 112       | 71        | 106       |
| 3.17      | Cypress                 | Cha o 1        | Q96385   | 96  | NLNKLNMPLYIAGN   | 3324.0523  | 6105      | 5877      | 1.2       | 203       | 6265      | 7305      | 378       | 718       | 9501      |
| 3.18      | Cypress                 | Cha o 1        | Q96385   | 211 | NHFFNHKVMLLGHS   | 3324.0521  | 215       | 2806      | 60        | 124       | 660       | 10863     | 557       | 24        | 2408      |
| 3.21      | Cypress                 | Cup a 1        | Q9SCG9   | 66  | KALWIIFSQNMNIK   | 3324.0604  | 3252      | 3488      | 13        | 582       | 378       | 2626      | 275       | 128       | 582       |
| 3.21      | Cypress                 | Cup a 1        | Q9SCG9   | 71  | IFSQNMNIKLMPLY   | 3324.0607  | 226       | 52        | 5.9       | 654       | 1012      | 503       | 3.0       | 0.23      | 1960      |
| 3.23      | Cypress                 | Cup a 1        | Q9SCG9   | 316 | EDTNIYNSNEAFKVE  | 3324.0606  | 11359     | 5992      | 0.84      | 100       | 2661      | 105       | 25        | 7518      | 1139      |
| 3.24      | Cypress                 | Cup s 1        | Q9M4S2   | 86  | EKALWIIFSQNMNIK  | 3324.0615  | 1519      | 820       | 15        | 50        | 195       | 2736      | 706       | 12        | 2176      |
| 3.24      | Cypress                 | Cup s 1        | Q9M4S2   | 91  | IIFSQNMNIKLMPL   | 3324.0618  | 143       | 654       | 15        | 127       | 1146      | 2187      | 5.6       | 626       | 200       |
| 3.24      | Cypress                 | Cup s 1        | Q9M4S2   | 96  | NMNIKLMPLYVAGH   | 3324.0624  | 98        | 206       | 225       | 10        | 559       | 18149     | 1152      | 152       | 639       |
| 3.26      | Cypress                 | Cup s 1        | Q9M4S2   | 211 | NHFFNHKVMLLGHD   | 3324.0616  | 237       | 2932      | 200       | 142       | 914       | 7250      | 549       | 11        | 2201      |
| 3.40      | White oak               | Que a 1        | B6RQS2   | 11  | ASVIPPARLFKAFVL  | 3324.1587  | 390       | 503       | 680       | 30        | 3.9       | 1634      | 2477      | 30        | 218       |
| 3.40      | White oak               | Que a 1        | B6RQS2   | 16  | PARLFKAFVLDSNDL  | 3324.1585  | 1005      | 1952      | 433       | 13        | 83        | 6.2       | 1094      | 14        | 502       |
| 3.40      | White oak               | Que a 1        | B6RQS2   | 21  | KAFVLDSNDLIPKVV  | 3324.1588  | 1174      | 1287      | 0.64      | 43        | 71        | 1.0       | 15        | 892       | 65        |

**Supplemental Table 4. HLA class II binding patterns of prevalently re**

| Region ID | Organism            | Source protein | Acc. no. | Pos | Sequence         | Peptide ID | DRB1*1101 | DRB1*1201 | DRB1*1302 | DRB1*1501 | DRB1*1602 | DRB3*0101 | DRB3*0202 | DRB4*0101 | DRB5*0101 |
|-----------|---------------------|----------------|----------|-----|------------------|------------|-----------|-----------|-----------|-----------|-----------|-----------|-----------|-----------|-----------|
| 3.41      | White oak           | Que a 1        | B6RQS2   | 141 | ASEVFKAVEAYLVAH  | 3324.1584  | 61        | 485       | 70        | 4.0       | 15        | 253       | 8.8       | 576       | 36        |
| 4.06      | Orchard grass       | Dac g 1        | Q7XAX7   | 181 | PNYLALLVKYVDGDG  | 3324.0655  | 133       | 284       | 4777      | 82        | 177       | 34528     | 674       | 415       | 587       |
| 4.07      | Orchard grass       | Dac g 2        | Q41183   | 11  | GSDEKNLALSISKYK  | 3324.0657  | 452       | 1575      | 97        | 136       | 847       | 14129     | 1034      | 1803      | 1268      |
| 4.07      | Orchard grass       | Dac g 2        | Q41183   | 16  | NLALSIKYNKEGDSM  | 3324.0658  | 115       | 5675      | 116       | 487       | 1518      | 6679      | 4791      | 4795      | 3590      |
| 4.09      | Orchard grass       | Dac g 4        | P82946   | 1   | DIYNYMEPYVSKVDP  | 3324.0663  | 748       | 8160      | 6384      | 70        | 2529      | 26539     | 28096     | 17451     | 190       |
| 4.13      | Rye grass           | Lol p 1        | P14946   | 176 | KASNPNYLAILVKYV  | 3324.1135  | 46        | 165       | 5.8       | 3.4       | 99        | 1513      | 9.5       | 83        | 139       |
| 4.14      | Rye grass           | Lol p 11       | Q7M1X5   | 111 | RYANPIAFFRKEPLK  | 3324.1138  | 895       | 574       | 347       | 62        | 136       | 3842      | 2250      | 562       | 52        |
| 4.14      | Rye grass           | Lol p 11       | Q7M1X5   | 116 | IAFFRKEPLKECGGI  | 3337.0029  | 383       | 8867      | 1666      | 122       | 472       | 915       | 11381     | 1770      | 109       |
| 4.15      | Rye grass           | Lol p 2        | P14947   | 51  | DGVWEIKSDKPLKGP  | 3324.1139  | 11353     | 50000     | 101       | 2247      | 326       | 719       | 18619     | 6923      | 1638      |
| 4.15      | Rye grass           | Lol p 2        | P14947   | 56  | IKSDKPLKGFNFRF   | 3324.1140  | 18417     | 8883      | 178       | 1162      | 961       | 1470      | 1642      | 6585      | 33683     |
| 4.16      | Rye grass           | Lol p 2        | P14947   | 76  | MRNVFDDVVPADFVKV | 3337.0030  | 11119     | 36345     | 1132      | 3375      | 6726      | 855       | 8286      | 7473      | 1392      |
| 4.17      | Rye grass           | Lol p 3        | P14948   | 11  | SDAKTLVLNIKYTRP  | 3324.1142  | 89        | 6223      | 410       | 2440      | 7796      | 22005     | 5168      | 2463      | 20103     |
| 4.18      | Rye grass           | Lol p 3        | P14948   | 51  | LWEVKSAKPLTGPMN  | 3337.0031  | 2649      | 14985     | 347       | 664       | 8426      | 24579     | 24793     | 31        | 792       |
| 4.19      | Rye grass           | Lol p 3        | P14948   | 76  | NVFDEVIPTAFTVYGK | 3324.1141  | 23345     | 11051     | 3895      | 3693      | 6185      | 9896      | 5681      | 148       | 37968     |
| 4.25      | Rye grass           | Lol p 5 1      | Q40237   | 71  | LIEKINAGFKA AVAA | 3324.1175  | 1833      | 4177      | 57        | 48        | 247       | 8694      | 126       | 907       | 10        |
| 4.29      | Rye grass           | Lol p 5 1      | Q40237   | 151 | DAYVATLREALRVIA  | 3324.1167  | 915       | 1302      | 12        | 387       | 273       | 223       | 52        | 342       | 200       |
| 4.29      | Rye grass           | Lol p 5 1      | Q40237   | 156 | TLTEALRVIAGTLEV  | 3324.1185  | 1724      | 1319      | 76        | 423       | 1068      | 4464      | 1511      | 429       | 3337      |
| 4.32      | Rye grass           | Lol p 5 1      | Q40237   | 236 | DSYKFIPTLVA AVKQ | 3324.1165  | 23        | 8323      | 46        | 285       | 190       | 1680      | 8.8       | 1454      | 16        |
| 4.36      | Rye grass           | Lol p 5 1      | Q40237   | 306 | PAAAYATATPAAATA  | 3324.1184  | 250       | 50000     | 3198      | 1529      | 162       | 10938     | 183       | 320       | 75        |
| 4.37      | Rye grass           | Lol p 5 2      | Q40240   | 181 | AFKIAATAANAAPT   | 3324.1197  | 84        | 8528      | 2.7       | 96        | 28        | 17319     | 62        | 67        | 144       |
| 4.40      | Canary grass        | Pha a 1        | Q41260   | 186 | PNYLALLVKYVDGDG  | 3324.1428  | 165       | 269       | 144       | 92        | 196       | 5040      | 876       | 98        | 1102      |
| 4.43      | Canary grass        | Pha a 5        | P56164   | 121 | DAFIAALTEALRVIA  | 3324.1432  | 33        | 11        | 12        | 1.3       | 7.6       | 13        | 8.5       | 73        | 0.36      |
| 4.43      | Canary grass        | Pha a 5        | P56164   | 126 | ALTEALRVIAGAFEV  | 3324.1437  | 263       | 212       | 69        | 147       | 815       | 13812     | 27576     | 113       | 323       |
| 4.44      | Canary grass        | Pha a 5        | P56164   | 166 | AAFKIAATAANSAPA  | 3324.1441  | 14        | 2382      | 1.8       | 29        | 23        | 738       | 0.61      | 11        | 6.9       |
| 4.45      | Canary grass        | Pha a 5        | P56164   | 181 | NDKFTVFEGAFNKAI  | 3324.1442  | 723       | 9786      | 171       | 8.3       | 33        | 631       | 82        | 475       | 0.51      |
| 4.46      | Canary grass        | Pha a 5        | P56164   | 201 | GAYETYKFIPSLAAA  | 3324.1433  | 83        | 735       | 661       | 45        | 341       | 10888     | 125       | 992       | 74        |
| 4.46      | Canary grass        | Pha a 5        | P56164   | 206 | YKFIPSLAAVVKQAY  | 3324.1436  | 130       | 1030      | 704       | 685       | 71        | 1738      | 107       | 828       | 27        |
| 4.79      | Kentucky blue grass | Poa p 1        | Q9ZP03   | 121 | EPIAAYHFDLSGKAF  | 3324.1556  | 588       | 704       | 1774      | 2.6       | 108       | 1.4       | 92        | 0.12      | 87        |
| 4.82      | Kentucky blue grass | Poa p 5        | Q9FFP0   | 51  | QKLMEDINVGFKAAV  | 3324.1580  | 634       | 10790     | 5.1       | 44        | 156       | 4.7       | 41        | 82        | 561       |
| 4.82      | Kentucky blue grass | Poa p 5        | Q9FFP0   | 56  | DINVGFKAAVAAAAG  | 3324.1571  | 619       | 7888      | 621       | 12        | 308       | 3192      | 864       | 796       | 111       |
| 4.82      | Kentucky blue grass | Poa p 5        | Q9FFP0   | 61  | FKA AVAAAAGAPPAD | 3324.1575  | 2286      | 7531      | 3458      | 519       | 334       | 14700     | 2418      | 3857      | 140       |
| 4.83      | Kentucky blue grass | Poa p 5        | Q9FFP0   | 121 | ATPEAKFDSFVA AFT | 3324.1570  | 13650     | 12428     | 109       | 67        | 875       | 2253      | 3475      | 85        | 683       |
| 4.84      | Kentucky blue grass | Poa p 5        | Q9FFP0   | 131 | VAAFTALRRIAGVL   | 3324.1576  | 73        | 1212      | 262       | 436       | 734       | 17847     | 1590      | 73        | 2246      |
| 4.85      | Kentucky blue grass | Poa p 5        | Q9FFP0   | 176 | AFKVAATAANAAPAN  | 3324.1578  | 325       | 13571     | 108       | 852       | 577       | 50000     | 95        | 374       | 460       |
| 4.86      | Kentucky blue grass | Poa p 5        | Q9FFP0   | 206 | ESTGGAYDTYKSIPS  | 3324.1583  | 5761      | 50000     | 815       | 573       | 335       | 513       | 1381      | 11481     | 3460      |
| 4.86      | Kentucky blue grass | Poa p 5        | Q9FFP0   | 211 | AYDITYKSIPSLAAV  | 3324.1579  | 29        | 19306     | 1894      | 61        | 5.7       | 7820      | 177       | 4373      | 104       |
| 4.87      | Kentucky blue grass | Poa p 5        | Q9FFP0   | 221 | LEAAVKQAYAAATIAA | 3324.1564  | 3363      | 5474      | 0.27      | 50        | 2335      | 356       | 1308      | 11        | 234       |
| 5.09      | Russian thistle     | Sal k 1 1      | Q17ST3   | 191 | EGTVDFIFGEARSLY  | 3324.1590  | 1641      | 772       | 258       | 18        | 1982      | 198       | 939       | 5972      | 114       |
| 5.11      | Russian thistle     | Sal k 1 1      | Q17ST3   | 321 | FITSLEYEAAKWLLP  | 3324.1589  | 1307      | 6237      | 62        | 544       | 5053      | 122       | 744       | 2140      | 164       |

Supplemental Table 4. HLA class II binding patterns of prevalently re

| Region ID | Organism                | Source protein | Acc. no. | Pos | Sequence        | Peptide ID | DQB1*0201 | DQB1*0202 | DQB1*0301 | DQB1*0302 | DQB1*0402 | DQB1*0501 | DQB1*0502 | DQB1*0503 | DQB1*0602 |
|-----------|-------------------------|----------------|----------|-----|-----------------|------------|-----------|-----------|-----------|-----------|-----------|-----------|-----------|-----------|-----------|
| 1.01      | Alt. rot fungus         | Alt a 1        | P79085   | 6   | IASLFAAAGLAAAAP | 3324.0015  | 4120      | 1055      | 2.8       | 3010      | 2402      | 24056     | 7019      | 7261      | 103       |
| 1.01      | Alt. rot fungus         | Alt a 1        | P79085   | 11  | AAAGLAAAAPLESRQ | 3324.0017  | 1853      | 50000     | 1.2       | 393       | 118       | 50000     | 8005      | 223       | 21        |
| 1.02      | Alt. rot fungus         | Alt a 1        | P79085   | 111 | KVSDDDITVATATLP | 3324.0013  | 123       | 8362      | 1144      | 2052      | 543       | 23106     | 25813     | 19392     | 2143      |
| 1.02      | Alt. rot fungus         | Alt a 1        | P79085   | 116 | ITYVATATLPNYCR  | 3324.0014  | 823       | 3845      | 59        | 764       | 170       | 17589     | 8971      | 14205     | 2232      |
| 1.03      | Alt. rot fungus         | Alt a 1        | P79085   | 141 | QGVADAYITLVTLPK | 3324.0011  | 1812      | 31720     | 1315      | 1045      | 459       | 8010      | 6014      | 9102      | 4947      |
| 1.03      | Alt. rot fungus         | Alt a 1        | P79085   | 143 | VADAYITLVTLPKSS | 3324.0016  | 570       | 7017      | 370       | 1743      | 1061      | 5103      | 7746      | 1117      | 70        |
| 1.08      | Alt. rot fungus         | Alt a 5        | P42037   | 51  | INELIASGSEKLASV | 3324.0065  | 5008      | 6578      | 72        | 4893      | 1877      | 34647     | 25918     | 7535      | 302       |
| 1.12      | Alt. rot fungus         | Alt a 6        | Q9HDT3   | 161 | GGRLAFQEFMIVPCE | 3324.0073  | 299       | 32061     | 710       | 564       | 1183      | 23        | 178       | 4943      | 1289      |
| 1.20      | Alt. rot fungus         | Alt a 7        | P42058   | 190 | AQGKAFYEAVAKAHQ | 3324.0080  | 8948      | 50000     | 694       | 2674      | 1674      | 345       | 1365      | 157       | 2356      |
| 1.22      | Alt. rot fungus         | Alt a 7        | P42058   | 6   | AIVYYSMYGHKKMA  | 3324.0085  | 5789      | 6241      | 417       | 32021     | 50000     | 392       | 3255      | 1662      | 3352      |
| 1.32      | <i>A. fumigatus</i>     | Asp f 17       | O60025   | 91  | SKKDKFVAANAGGTV | 3324.0212  | 5873      | 3328      | 16        | 2657      | 416       | 50000     | 1381      | 162       | 26891     |
| 1.38      | <i>C. herbarum</i>      | Cl a h 5       | P42039   | 6   | AFLLGLAGNSSPSA  | 3324.0576  | 3864      | 8356      | 12        | 11230     | 66        | 5484      | 718       | 557       | 792       |
| 1.41      | <i>C. herbarum</i>      | Cl a h 6       | P42040   | 161 | GGRLAFQEFMIVPSG | 3324.0588  | 1989      | 50000     | 2502      | 2619      | 2807      | 68        | 4947      | 2437      | 1515      |
| 1.48      | <i>C. herbarum</i>      | Cl a h 8       | PoCoY5   | 101 | QIDAFIANAGATADS | 3324.0601  | 482       | 3501      | 17        | 1024      | 57        | 11040     | 819       | 84        | 737       |
| 1.49      | <i>C. herbarum</i>      | Cl a h 8       | PoCoY5   | 151 | GTGSLVITASMSGHI | 3324.0603  | 3922      | 114       | 31        | 11509     | 5287      | 6135      | 27045     | 13832     | 484       |
| 1.50      | <i>C. herbarum</i>      | Cl a h 8       | PoCoY5   | 181 | GCIHMARSLANEWRD | 3324.0602  | 1048      | 301       | 41        | 1650      | 116       | 3078      | 673       | 649       | 174       |
| 1.51      | <i>C. herbarum</i>      | Cl a h 8       | PoCoY5   | 236 | KELKGAYVVFASDAS | 3324.0598  | 306       | 1225      | 23        | 1472      | 781       | 1043      | 4672      | 518       | 12        |
| 1.54      | <i>P. chrysogenum</i>   | Pen ch 13      | Q9URR2   | 101 | PAVKYIEPDMIVNAT | 3324.1304  | 47        | 283       |           | 822       | 1314      | 119       | 1961      | 1786      | 549       |
| 1.57      | <i>P. chrysogenum</i>   | Pen ch 13      | Q9URR2   | 271 | GIFLSVAAGNEAENA | 3324.1303  | 121       | 4717      | 33        | 52        | 102       | 3957      | 50000     | 50000     | 370       |
| 1.63      | <i>P. chrysogenum</i>   | Pen ch 18      | Q9P8G3   | 226 | KFGVAKKANVYAVKV | 3324.1330  | 994       | 9490      | 114       | 12547     | 1199      | 28997     | 10107     | 8157      | 1583      |
| 1.64      | <i>P. chrysogenum</i>   | Pen ch 18      | Q9P8G3   | 291 | LDLAVNAADVAGIHF | 3324.1331  | 87        | 361       | 19        | 138       | 12        | 128       | 583       | 1149      | 480       |
| 2.15      | Cat epithelia           | Fel d 1 1      | P30438   | 41  | DEYVEQVQYKALPV  | 3324.1049  | 512       | 630       | 5346      | 1188      | 806       | 147       | 337       | 2523      | 140       |
| 2.15      | Cat epithelia           | Fel d 1 1      | P30438   | 46  | QVAQYKALPVVLENA | 3324.1051  | 661       | 21374     | 5072      | 150       | 46        | 434       | 552       | 610       | 1596      |
| 2.16      | Cat epithelia           | Fel d 1 1      | P30438   | 78  | NALSVDLKIYTSPLC | 3324.1050  | 2628      | 1593      | 6450      | 3675      | 611       | 687       | 3312      | 5835      | 1000      |
| 2.17      | Cat epithelia           | Fel d 1 2      | P30440   | 21  | AETCPIFYDVFVAFA | 3324.1056  | 132       | 2101      | 108       | 209       | 75        | 36        | 464       | 263       | 2273      |
| 2.17      | Cat epithelia           | Fel d 1 2      | P30440   | 26  | IFYDVFVAANGNEL  | 3324.1052  | 198       | 28703     | 19        | 320       | 329       | 872       | 6652      | 8127      | 1134      |
| 2.18      | Cat epithelia           | Fel d 1 2      | P30440   | 36  | NGNELLLDLSLTKVN | 3324.1055  | 2585      | 8017      | 3528      | 1981      | 3942      | 629       | 2865      | 9367      | 10904     |
| 2.30      | <i>D. farinae</i>       | Der f 1        | A1YW11   | 131 | GSCWAFSGVAATESA | 3324.0670  | 97        | 5447      | 24        | 249       | 84        | 5340      | 9320      | 7931      | 1334      |
| 2.30      | <i>D. farinae</i>       | Der f 1        | A1YW11   | 136 | FSGVAATESAYLAYR | 3324.0666  | 65        | 156       | 44        | 1137      | 76        | 3429      | 1209      | 4191      | 2016      |
| 2.56      | <i>D. pteronyssinus</i> | Der p 1        | P08176   | 131 | SCWAFSGVAATESAY | 3324.0832  | 92        | 21        |           | 61        | 34        | 6535      | 4402      | 8426      | 136       |
| 2.56      | <i>D. pteronyssinus</i> | Der p 1        | P08176   | 136 | SGVAATESAYLAYRN | 3324.0829  | 210       | 871       |           | 3429      | 2855      | 496       | 2997      | 5141      | 1136      |
| 2.57      | <i>D. pteronyssinus</i> | Der p 1        | P08176   | 176 | RGIEYIQHNGVVQES | 3324.0831  | 263       | 32412     |           | 1188      | 723       | 8536      | 1139      | 12278     | 859       |
| 2.58      | <i>D. pteronyssinus</i> | Der p 1        | P08176   | 226 | REALAQTHSAIAVVI | 3324.0840  | 536       | 629       |           | 1377      | 1848      | 436       | 2459      | 32124     | 291       |
| 2.73      | <i>D. pteronyssinus</i> | Der p 4        | Q9Y197   | 86  | NKAGVRIYVDIVLNH | 3324.0981  | 2215      | 15466     |           | 1201      | 4845      | 54        | 4508      | 8099      | 5125      |
| 2.73      | <i>D. pteronyssinus</i> | Der p 4        | Q9Y197   | 96  | IVLNHMTGAQSGKGT | 3324.0987  | 29771     | 50000     |           | 228       | 8351      | 3184      | 26479     | 50000     | 12133     |
| 2.75      | <i>D. pteronyssinus</i> | Der p 4        | Q9Y197   | 251 | IEFRFYKEITNVFRG | 3324.0976  | 227       | 6202      |           | 531       | 2740      | 2505      | 668       | 5519      | 4366      |
| 2.77      | <i>D. pteronyssinus</i> | Der p 4        | Q9Y197   | 321 | AFMLAWNYGVPVMS  | 3324.0977  | 698       | 8364      |           | 8.6       | 2475      | 535       | 192       | 339       | 762       |
| 2.79      | <i>D. pteronyssinus</i> | Der p 4        | Q9Y197   | 381 | EHRWREIYNMVKFRM | 3324.0986  | 3886      | 21738     |           | 10587     | 7236      | 39494     | 346       | 8936      | 4244      |
| 2.79      | <i>D. pteronyssinus</i> | Der p 4        | Q9Y197   | 386 | EIYNMVKFRMIAGQE | 3324.0978  | 2104      | 29098     |           | 453       | 799       | 838       | 3705      | 26552     | 11155     |
| 2.80      | <i>D. pteronyssinus</i> | Der p 4        | Q9Y197   | 411 | YQIAFSRGNRAFI   | 3324.0980  | 164       | 8722      |           | 304       | 194       | 853       | 101       | 1406      | 12        |
| 2.80      | <i>D. pteronyssinus</i> | Der p 4        | Q9Y197   | 416 | SRGNRAFIINLQKN  | 3324.0974  | 364       | 7387      |           | 750       | 487       | 125       | 150       | 546       | 84        |
| 2.81      | <i>D. pteronyssinus</i> | Der p 4        | Q9Y197   | 476 | VVGHDEDFAVAYHI  | 3324.0975  | 113       | 8141      |           | 986       | 198       | 51        | 151       | 5043      | 1188      |
| 2.81      | <i>D. pteronyssinus</i> | Der p 4        | Q9Y197   | 482 | FDAFVAYHIGARIVS | 3324.0971  | 2735      | 4750      |           | 56        | 3358      | 1265      | 219       | 666       | 1079      |
| 3.01      | Alder                   | Aln g 1        | P38948   | 11  | PSVIPAARLFKAFIL | 3324.0004  | 2592      | 11232     |           | 13        | 9502      | 3892      | 1218      | 325       | 1451      |
| 3.01      | Alder                   | Aln g 1        | P38948   | 16  | AARLFKAFILDGDKL | 3324.0003  | 123       | 4170      |           | 1739      | 916       | 426       | 60        | 827       | 910       |
| 3.02      | Alder                   | Aln g 1        | P38948   | 111 | GGSILKISNKFHTKG | 3324.0007  | 13610     | 50000     |           | 557       | 31293     | 50000     | 6829      | 397       | 5806      |
| 3.06      | Birch                   | Bet v 1        | O23754   | 96  | LEKISNEIKIVATPD | 3324.0353  | 67        | 8672      |           | 1337      | 832       | 2035      | 3613      | 5095      | 8893      |
| 3.07      | Birch                   | Bet v 1        | O23754   | 111 | GGSILKISNKHHTKG | 3324.0352  | 3537      | 5376      |           | 642       | 32210     | 18603     | 871       | 1033      | 6058      |
| 3.13      | Birch                   | Bet v 6        | Q9FUW6   | 206 | RTLNKIVYIKPAKNI | 3324.0387  | 1075      | 12465     |           | 1060      | 8820      | 1240      | 5585      | 1272      | 3461      |
| 3.13      | Birch                   | Bet v 6        | Q9FUW6   | 211 | IVYIKPAKNIYSFNE | 3324.0386  | 1867      | 1491      |           | 121       | 6361      | 2791      | 1876      | 5835      | 650       |
| 3.17      | Cypress                 | Cha o 1        | Q96385   | 86  | ERSLWIIFSKNLNIK | 3324.0517  | 3172      | 538       |           | 638       | 5593      | 27574     | 729       | 739       | 301       |
| 3.17      | Cypress                 | Cha o 1        | Q96385   | 96  | NLNKLNMPLYIAGN  | 3324.0523  | 10464     | 39726     |           | 31919     | 50000     | 30440     | 6387      | 9115      | 10733     |
| 3.18      | Cypress                 | Cha o 1        | Q96385   | 211 | NHFFNHHKVMLLGHS | 3324.0521  | 7924      | 8395      |           | 3764      | 10232     | 17866     | 3978      | 5872      | 2358      |
| 3.21      | Cypress                 | Cup a 1        | Q9SCG9   | 66  | KALWIIFSQNMNIKL | 3324.0604  | 8265      | 36682     |           | 883       | 20699     | 28918     | 5797      | 50000     | 29047     |
| 3.21      | Cypress                 | Cup a 1        | Q9SCG9   | 71  | IFSQNMNIKLMPLY  | 3324.0607  | 684       | 918       |           | 710       | 827       | 1043      | 4578      | 4714      | 4899      |
| 3.23      | Cypress                 | Cup a 1        | Q9SCG9   | 316 | EDTNIYNSNEAFKVE | 3324.0606  | 111       | 7541      |           | 1212      | 711       | 163       | 12904     | 2416      | 11286     |
| 3.24      | Cypress                 | Cup s 1        | Q9M4S2   | 86  | EKALWIIFSQNMNIK | 3324.0615  | 2962      | 5556      |           | 7955      | 7270      | 6143      | 888       | 12985     | 1930      |
| 3.24      | Cypress                 | Cup s 1        | Q9M4S2   | 91  | IIFSQNMNIKLMPL  | 3324.0618  | 37377     | 24912     |           | 38760     | 50000     | 6739      | 25974     | 32436     | 35955     |
| 3.24      | Cypress                 | Cup s 1        | Q9M4S2   | 96  | NMNIKLMPLYVAGH  | 3324.0624  | 50000     | 50000     |           | 3057      | 50000     | 27874     | 33698     | 20832     | 11703     |
| 3.26      | Cypress                 | Cup s 1        | Q9M4S2   | 211 | NHFFNHHKVMLLGHD | 3324.0616  | 7308      | 28117     |           | 2356      | 30130     | 35059     | 3323      | 4140      | 4158      |
| 3.40      | White oak               | Que a 1        | B6RQS2   | 11  | ASVIPPARLFKAFVL | 3324.1587  | 2114      | 6727      |           | 38        | 4693      | 3295      | 1321      | 636       | 1948      |
| 3.40      | White oak               | Que a 1        | B6RQS2   | 16  | PARLFKAFVLDSDNL | 3324.1585  | 12        | 310       |           | 1472      | 167       | 71        | 22        | 7.9       | 161       |
| 3.40      | White oak               | Que a 1        | B6RQS2   | 21  | KAFVLDSDNLPKVV  | 3324.1588  | 116       | 194       |           | 4575      | 3941      | 900       | 302       | 162       | 2639      |

**Supplemental Table 4. HLA class II binding patterns of prevalently re**

| Region ID | Organism            | Source protein | Acc. no. | Pos | Sequence          | Peptide ID | DQB1*0201 | DQB1*0202 | DQB1*0301 | DQB1*0302 | DQB1*0402 | DQB1*0501 | DQB1*0502 | DQB1*0503 | DQB1*0602 |
|-----------|---------------------|----------------|----------|-----|-------------------|------------|-----------|-----------|-----------|-----------|-----------|-----------|-----------|-----------|-----------|
| 3.41      | White oak           | Que a 1        | B6RQS2   | 141 | ASEVFKAVEAYLVAH   | 3324.1584  | 308       | 953       | 88        | 423       | 240       | 1252      | 5307      | 2036      | 183       |
| 4.06      | Orchard grass       | Dac g 1        | Q7XAX7   | 181 | PNYLALLVKYVDGDG   | 3324.0655  | 1131      | 3444      | 382       | 904       | 1191      | 629       | 2011      | 6210      | 330       |
| 4.07      | Orchard grass       | Dac g 2        | Q41183   | 11  | GSDEKNLALSISKYK   | 3324.0657  | 26713     | 7196      | 2419      | 9020      | 6027      | 30986     | 739       | 50000     | 130       |
| 4.07      | Orchard grass       | Dac g 2        | Q41183   | 16  | NLALSIKYNKEGDSM   | 3324.0658  | 1225      | 2121      | 6011      | 5470      | 2137      | 10389     | 3871      | 8965      | 258       |
| 4.09      | Orchard grass       | Dac g 4        | P82946   | 1   | DIYNYMEPYVSKVDP   | 3324.0663  | 4569      | 6212      | 9809      | 13492     | 3874      | 188       | 2016      | 981       | 12122     |
| 4.13      | Rye grass           | Lol p 1        | P14946   | 176 | KASNPNYLAILVKYV   | 3324.1135  | 1405      | 5443      | 805       | 5850      | 1810      | 627       | 1244      | 1316      | 667       |
| 4.14      | Rye grass           | Lol p 11       | Q7M1X5   | 111 | RYANPIAFFRKEPLK   | 3324.1138  | 4460      | 25959     | 5721      | 32683     | 5739      | 215       | 793       | 1597      | 9744      |
| 4.14      | Rye grass           | Lol p 11       | Q7M1X5   | 116 | IAFFRKEPLKECGGI   | 3337.0029  | 27269     | 26168     | 8997      | 50000     | 1829      | 50000     | 1441      | 903       | 50000     |
| 4.15      | Rye grass           | Lol p 2        | P14947   | 51  | DGVWEIKSDKPLKGP   | 3324.1139  | 1068      | 530       | 698       | 39629     | 9885      | 50000     | 9236      | 50000     | 26620     |
| 4.15      | Rye grass           | Lol p 2        | P14947   | 56  | IKSDKPLKGFNFRF    | 3324.1140  | 4976      | 2241      | 33901     | 50000     | 39533     | 8398      | 38172     | 50000     | 50000     |
| 4.16      | Rye grass           | Lol p 2        | P14947   | 76  | MRNVFDDVVPADFVKV  | 3337.0030  | 646       | 148       | 20336     | 50000     | 622       | 50000     | 61        | 347       | 39533     |
| 4.17      | Rye grass           | Lol p 3        | P14948   | 11  | SDAKTLVLNIKYTRP   | 3324.1142  | 19328     | 25717     | 26715     | 19079     | 10584     | 50000     | 50000     | 33924     | 28683     |
| 4.18      | Rye grass           | Lol p 3        | P14948   | 51  | LWEVKSAKPLTGPMN   | 3337.0031  | 4656      | 2441      | 48        | 50000     | 846       | 50000     | 2336      | 11264     | 3946      |
| 4.19      | Rye grass           | Lol p 3        | P14948   | 76  | NVFDEVIPTAFTYVK   | 3324.1141  | 1816      | 1696      | 10397     | 7083      | 1266      | 12367     | 17499     | 2899      | 50000     |
| 4.25      | Rye grass           | Lol p 5 1      | Q40237   | 71  | LIEKINAGFKA AVAA  | 3324.1175  | 3075      | 50000     | 20        | 454       | 215       | 83        | 430       | 147       | 24        |
| 4.29      | Rye grass           | Lol p 5 1      | Q40237   | 151 | DAYVATLTEALRVIA   | 3324.1167  | 707       | 1800      | 1118      | 543       | 125       | 50000     | 50000     | 50000     | 4717      |
| 4.29      | Rye grass           | Lol p 5 1      | Q40237   | 156 | TLTEALRVIA GTLEV  | 3324.1185  | 278       | 2248      | 132       | 854       | 40        | 6132      | 9812      | 4648      | 110       |
| 4.32      | Rye grass           | Lol p 5 1      | Q40237   | 236 | DSYKFIP TLVA AVK  | 3324.1165  | 943       | 5863      | 73        | 448       | 180       | 21294     | 50000     | 4637      | 962       |
| 4.36      | Rye grass           | Lol p 5 1      | Q40237   | 306 | PAAAYATATPAAATA   | 3324.1184  | 1766      | 679       | 3.8       | 700       | 102       | 11352     | 7446      | 1738      | 224       |
| 4.37      | Rye grass           | Lol p 5 2      | Q40240   | 181 | AFKIAATAANAAPT    | 3324.1197  | 431       | 2314      | 4.2       | 277       | 138       | 16916     | 21605     | 6721      | 31        |
| 4.40      | Canary grass        | Pha a 1        | Q41260   | 186 | PNYLALLVKYVDGDG   | 3324.1428  | 459       | 11971     | 1009      | 1243      | 2753      | 740       | 8618      | 50000     | 675       |
| 4.43      | Canary grass        | Pha a 5        | P56164   | 121 | DAFIAALTEALRVIA   | 3324.1432  | 97        | 2038      | 2.5       | 2.3       | 230       | 610       | 24876     | 50000     | 70        |
| 4.43      | Canary grass        | Pha a 5        | P56164   | 126 | ALTEALRVIA GAFEV  | 3324.1437  | 132       | 4668      | 75        | 189       | 151       | 4412      | 3107      | 181       | 23        |
| 4.44      | Canary grass        | Pha a 5        | P56164   | 166 | AAFKIAATAANSAPA   | 3324.1441  | 237       | 1172      | 7.1       | 457       | 83        | 3079      | 982       | 86        | 25        |
| 4.45      | Canary grass        | Pha a 5        | P56164   | 181 | NDKFTVFEGAFNKAI   | 3324.1442  | 2630      | 1194      | 211       | 2614      | 1302      | 3407      | 966       | 2540      | 429       |
| 4.46      | Canary grass        | Pha a 5        | P56164   | 201 | GAYETYKFIP SLEAA  | 3324.1433  | 515       | 163       | 81        | 72        | 36        | 191       | 70        | 358       | 846       |
| 4.46      | Canary grass        | Pha a 5        | P56164   | 206 | YKFIP SLEAAVKQAY  | 3324.1436  | 2114      | 2125      | 839       | 2370      | 640       | 9969      | 2647      | 1029      | 732       |
| 4.79      | Kentucky blue grass | Poa p 1        | Q9ZP03   | 121 | EPIAAYHFDLSGKAF   | 3324.1556  | 580       | 2173      | 143       | 4634      | 274       | 563       | 680       | 79        | 3426      |
| 4.82      | Kentucky blue grass | Poa p 5        | Q9FFP0   | 51  | QKLMEDINVGFKAAV   | 3324.1580  | 9101      | 8072      | 1567      | 2884      | 785       | 1009      | 3189      | 5214      | 1291      |
| 4.82      | Kentucky blue grass | Poa p 5        | Q9FFP0   | 56  | DINVGFKAAVAAAAG   | 3324.1571  | 2268      | 9550      | 5.5       | 651       | 137       | 631       | 5410      | 663       | 34        |
| 4.82      | Kentucky blue grass | Poa p 5        | Q9FFP0   | 61  | FKA AVAAAAGAPPAD  | 3324.1575  | 3690      | 25684     | 1.9       | 1153      | 322       | 11872     | 6782      | 1380      | 793       |
| 4.83      | Kentucky blue grass | Poa p 5        | Q9FFP0   | 121 | ATPEAKFDSFVA AFT  | 3324.1570  | 1026      | 5123      | 628       | 197       | 24        | 2818      | 8000      | 910       | 3192      |
| 4.84      | Kentucky blue grass | Poa p 5        | Q9FFP0   | 131 | VAAFTALRIAGVL     | 3324.1576  | 856       | 18825     | 844       | 11612     | 10345     | 1862      | 50000     | 10912     | 471       |
| 4.85      | Kentucky blue grass | Poa p 5        | Q9FFP0   | 176 | AFKVAATAANAAPAN   | 3324.1578  | 1523      | 3198      | 32        | 2854      | 314       | 6808      | 50000     | 21644     | 144       |
| 4.86      | Kentucky blue grass | Poa p 5        | Q9FFP0   | 206 | ESTGGAYDTYKSIPS   | 3324.1583  | 7961      | 2754      | 938       | 7772      | 4639      | 6583      | 18032     | 5811      | 1029      |
| 4.86      | Kentucky blue grass | Poa p 5        | Q9FFP0   | 211 | AYDITYKSIP SLEAAV | 3324.1579  | 1040      | 1496      | 407       | 183       | 44        | 5384      | 8336      | 5319      | 96        |
| 4.87      | Kentucky blue grass | Poa p 5        | Q9FFP0   | 221 | LEAAVKQAYAAATIAA  | 3324.1564  | 1660      | 5850      | 38        | 1230      | 475       | 3581      | 10001     | 890       | 146       |
| 5.09      | Russian thistle     | Sal k 1 1      | Q17ST3   | 191 | EGTVDFIFGEARSLY   | 3324.1590  | 734       | 3116      | 46        | 952       | 412       | 2582      | 6849      | 2356      | 1337      |
| 5.11      | Russian thistle     | Sal k 1 1      | Q17ST3   | 321 | FITSLEYEAAKWLLP   | 3324.1589  | 412       | 2977      | 1933      | 6628      | 2521      | 6188      | 19481     | 16501     | 1296      |

Supplemental Table 4. HLA class II binding patterns of prevalently re

| Region ID | Organism                | Source protein | Acc. no. | Pos | Sequence         | Peptide ID | DPB1*0101 | DPB1*0201 | DPB1*0301 | DPB1*0401 | DPB1*0402 | DPB1*0501 | DPB1*1401 | DPB1*2001 |
|-----------|-------------------------|----------------|----------|-----|------------------|------------|-----------|-----------|-----------|-----------|-----------|-----------|-----------|-----------|
| 1.01      | Alt. rot fungus         | Alt a 1        | P79085   | 6   | IASLFAAAAGLAAAAP | 3324.0015  | 6156      | 2492      | 61        | 28038     | 582       | 3718      | 234       | 2089      |
| 1.01      | Alt. rot fungus         | Alt a 1        | P79085   | 11  | AAAGLAAAAPLESRQ  | 3324.0017  | 3370      | 357       | 71        | 40712     | 19838     | 463       | 125       | 184       |
| 1.02      | Alt. rot fungus         | Alt a 1        | P79085   | 111 | KVSDDDITYVATATLP | 3324.0013  | 1768      | 18050     | 685       | 1614      | 3389      | 1286      | 4372      | 12845     |
| 1.02      | Alt. rot fungus         | Alt a 1        | P79085   | 116 | ITYVATATLPNYCRA  | 3324.0014  | 988       | 969       | 241       | 2994      | 2258      | 1867      | 1139      | 200       |
| 1.03      | Alt. rot fungus         | Alt a 1        | P79085   | 141 | QGVADAYITLVTLPK  | 3324.0011  | 444       | 7728      | 16881     | 2009      | 509       | 72        | 3388      | 8828      |
| 1.03      | Alt. rot fungus         | Alt a 1        | P79085   | 143 | VADAYITLVTLPKSS  | 3324.0016  | 40        | 11996     | 1124      | 2501      | 1065      | 7.1       | 1432      | 8647      |
| 1.08      | Alt. rot fungus         | Alt a 5        | P42037   | 51  | INELIASGSEKLASV  | 3324.0065  | 527       | 2734      | 3549      | 2738      | 1177      | 329       | 50        | 7505      |
| 1.12      | Alt. rot fungus         | Alt a 6        | Q9HDT3   | 161 | GGRLAFQEFMIVPCE  | 3324.0073  | 47        | 35        | 5073      | 51        | 69        | 477       | 3088      | 7642      |
| 1.20      | Alt. rot fungus         | Alt a 7        | P42058   | 190 | AQGKAFYEAVALAHQ  | 3324.0080  | 39        | 104       | 36        | 412       | 685       | 45        | 938       | 77        |
| 1.22      | Alt. rot fungus         | Alt a 7        | P42058   | 6   | AIVYYSMYGHKKMA   | 3324.0085  | 33        | 107       | 32        | 72        | 145       | 47        | 398       | 1294      |
| 1.32      | <i>A. fumigatus</i>     | Asp f 17       | O60025   | 91  | SKKDKFVAANAGGTV  | 3324.0212  | 22256     | 2956      | 1824      | 11512     | 50000     | 5627      | 7611      | 2587      |
| 1.38      | <i>C. herbarum</i>      | Cl a 5         | P42039   | 6   | AFLLGLAGNSSPSA   | 3324.0576  | 1437      | 112       | 406       | 1910      | 232       | 8188      | 4054      | 143       |
| 1.41      | <i>C. herbarum</i>      | Cl a 6         | P42040   | 161 | GGRLAFQEFMIVPSG  | 3324.0588  | 202       | 57        | 1091      | 37        | 268       | 83        | 9666      | 29599     |
| 1.48      | <i>C. herbarum</i>      | Cl a 8         | PoCoY5   | 101 | QIDAFIANAGATADS  | 3324.0601  | 6173      | 2559      | 8817      | 1880      | 19500     | 36023     | 1876      | 2378      |
| 1.49      | <i>C. herbarum</i>      | Cl a 8         | PoCoY5   | 151 | GTGSLVITASMSGHI  | 3324.0603  | 12974     | 26959     | 129       | 7104      | 10715     | 8303      | 36        | 1562      |
| 1.50      | <i>C. herbarum</i>      | Cl a 8         | PoCoY5   | 181 | GCIHMARSLANEWRD  | 3324.0602  | 5570      | 8054      | 695       | 21959     | 32474     | 6254      | 3885      | 1270      |
| 1.51      | <i>C. herbarum</i>      | Cl a 8         | PoCoY5   | 236 | KELKGAYVVFASDAS  | 3324.0598  | 181       | 57        | 1578      | 60        | 537       | 1556      | 2384      | 1247      |
| 1.54      | <i>P. chrysogenum</i>   | Pen ch 13      | Q9URR2   | 101 | PAVKYIEPDMIVNAT  | 3324.1304  | 234       | 1013      | 234       | 91        | 389       | 170       | 503       | 503       |
| 1.57      | <i>P. chrysogenum</i>   | Pen ch 13      | Q9URR2   | 271 | GIFLSVAAGNEAENA  | 3324.1303  | 549       | 108       | 5.0       | 204       | 3667      | 6490      | 70        | 146       |
| 1.63      | <i>P. chrysogenum</i>   | Pen ch 18      | Q9P8G3   | 226 | KFGVAKKANVYAVKV  | 3324.1330  | 1773      | 501       | 812       | 5008      | 4599      | 3553      | 50000     | 2723      |
| 1.64      | <i>P. chrysogenum</i>   | Pen ch 18      | Q9P8G3   | 291 | LDLAVNAADVAGIHF  | 3324.1331  | 6381      | 5052      | 273       | 9176      | 6632      | 8028      | 43033     | 5533      |
| 2.15      | Cat epithelia           | Fel d 1 1      | P30438   | 41  | DEYVEQVAQYKALPV  | 3324.1049  | 1670      | 1120      | 1036      | 533       | 26784     | 16357     | 1149      | 17743     |
| 2.15      | Cat epithelia           | Fel d 1 1      | P30438   | 46  | QVAQYKALPVVLENA  | 3324.1051  | 3517      | 1808      | 14        | 14857     | 20869     | 3802      | 65        | 806       |
| 2.16      | Cat epithelia           | Fel d 1 1      | P30438   | 78  | NALSVDLKIYTSPLC  | 3324.1050  | 251       | 575       | 3147      | 349       | 32        | 152       | 3094      | 1360      |
| 2.17      | Cat epithelia           | Fel d 1 2      | P30440   | 21  | AETCFPIFYDVFFAVA | 3324.1056  | 3.1       | 8.1       | 1740      | 5.6       | 28        | 520       | 92        | 3965      |
| 2.17      | Cat epithelia           | Fel d 1 2      | P30440   | 26  | IFYDVFFAVANGNEL  | 3324.1052  | 3268      | 89        | 344       | 242       | 5175      | 5558      | 3247      | 1232      |
| 2.18      | Cat epithelia           | Fel d 1 2      | P30440   | 36  | NGNELLLDLSLTKVN  | 3324.1055  | 180       | 841       | 5014      | 590       | 844       | 57        | 1445      | 15456     |
| 2.30      | <i>D. farinae</i>       | Der f 1        | A1YW11   | 131 | GSCWAFSGVAATESA  | 3324.0670  | 9878      | 9311      | 18        | 14425     | 6224      | 17163     | 13775     | 396       |
| 2.30      | <i>D. farinae</i>       | Der f 1        | A1YW11   | 136 | FSGVAATESAYLAYR  | 3324.0666  | 8430      | 8262      | 276       | 1443      | 20587     | 8843      | 6182      | 1186      |
| 2.56      | <i>D. pteronyssinus</i> | Der p 1        | Po8176   | 131 | SCWAFSGVAATESAY  | 3324.0832  | 1362      | 20        | 20        | 3908      | 9552      | 652       | 7.7       | 7.7       |
| 2.56      | <i>D. pteronyssinus</i> | Der p 1        | Po8176   | 136 | SGVAATESAYLAYRN  | 3324.0829  | 1205      | 1601      | 1601      | 20081     | 4927      | 9417      | 449       | 449       |
| 2.57      | <i>D. pteronyssinus</i> | Der p 1        | Po8176   | 176 | RGIEYIQHNGVVQES  | 3324.0831  | 1625      | 4341      | 4341      | 7397      | 35246     | 50000     | 726       | 726       |
| 2.58      | <i>D. pteronyssinus</i> | Der p 1        | Po8176   | 226 | REALAQTHSAIAVII  | 3324.0840  | 232       | 1017      | 1017      | 32        | 3999      | 1219      | 310       | 310       |
| 2.73      | <i>D. pteronyssinus</i> | Der p 4        | Q9Y197   | 86  | NKAGVRIYVDIVLNH  | 3324.0981  | 258       | 220       | 2.5       | 2722      | 1368      | 1602      | 1317      | 17        |
| 2.73      | <i>D. pteronyssinus</i> | Der p 4        | Q9Y197   | 96  | IVLNHMTGAQSGKGT  | 3324.0987  | 15476     | 2227      | 505       | 16086     | 25757     | 3452      | 15612     | 2929      |
| 2.75      | <i>D. pteronyssinus</i> | Der p 4        | Q9Y197   | 251 | IEFRFYKEITNVFRG  | 3324.0976  | 419       | 35        | 123       | 3334      | 14        | 45        | 905       | 247       |
| 2.77      | <i>D. pteronyssinus</i> | Der p 4        | Q9Y197   | 321 | AFMLAWNYGPRVMS   | 3324.0977  | 1638      | 185       | 988       | 5157      | 907       | 5066      | 2674      | 1004      |
| 2.79      | <i>D. pteronyssinus</i> | Der p 4        | Q9Y197   | 381 | EHRWREIYNMVKFRM  | 3324.0986  | 324       | 109       | 92        | 549       | 3087      | 106       | 6551      | 585       |
| 2.79      | <i>D. pteronyssinus</i> | Der p 4        | Q9Y197   | 386 | EIYNMVKFRMIAQGE  | 3324.0978  | 583       | 5.3       | 4120      | 122       | 3322      | 2233      | 7868      | 9005      |
| 2.80      | <i>D. pteronyssinus</i> | Der p 4        | Q9Y197   | 411 | YQIAFSRGNRAFIAI  | 3324.0980  | 400       | 8.4       | 8.4       | 1514      | 1394      | 703       | 6.9       | 6.9       |
| 2.80      | <i>D. pteronyssinus</i> | Der p 4        | Q9Y197   | 416 | SRGNRAFIAINLQKN  | 3324.0974  | 9.1       | 7.2       | 0.67      | 37        | 15        | 13        | 4280      | 3.5       |
| 2.81      | <i>D. pteronyssinus</i> | Der p 4        | Q9Y197   | 476 | VYGHDEFDAFVAYHI  | 3324.0975  | 323       | 24        | 177       | 24        | 273       | 83        | 32        | 379       |
| 2.81      | <i>D. pteronyssinus</i> | Der p 4        | Q9Y197   | 482 | FDAFVAYHIGARIVS  | 3324.0971  | 173       | 12        | 286       | 71        | 66        | 778       | 11410     | 509       |
| 3.01      | Alder                   | Aln g 1        | P38948   | 11  | PSVIPAARLFKAFIL  | 3324.0004  | 85        | 63        | 820       | 7275      | 1500      | 493       | 38        | 1824      |
| 3.01      | Alder                   | Aln g 1        | P38948   | 16  | AARLFKAFILDGDKL  | 3324.0003  | 388       | 36        | 1879      | 1810      | 8114      | 54        | 1021      | 2570      |
| 3.02      | Alder                   | Aln g 1        | P38948   | 111 | GGSILKISKNFHTKGG | 3324.0007  | 391       | 843       | 17488     | 18503     | 918       | 3.3       | 1042      | 50000     |
| 3.06      | Birch                   | Bet v 1        | O23754   | 96  | LEKISNEIKIVATPD  | 3324.0353  | 4094      | 7568      | 5614      | 6815      | 2700      | 336       | 5983      | 5918      |
| 3.07      | Birch                   | Bet v 1        | O23754   | 111 | GGSILKISKNYHTKGG | 3324.0352  | 279       | 4651      | 12307     | 10528     | 1391      | 2.2       | 7590      | 12980     |
| 3.13      | Birch                   | Bet v 6        | Q9FUW6   | 206 | RTLNKIVYIKPAKNI  | 3324.0387  | 128       | 70        | 0.039     | 41        | 92        | 157       | 3767      | 3.3       |
| 3.13      | Birch                   | Bet v 6        | Q9FUW6   | 211 | IVYIKPAKNIYSFNE  | 3324.0386  | 1612      | 1352      | 5.1       | 5907      | 6715      | 1054      | 2923      | 178       |
| 3.17      | Cypress                 | Cha o 1        | Q96385   | 86  | ERSLWIIFSKNLNIK  | 3324.0517  | 13        | 13        | 3.1       | 92        | 275       | 11        | 2884      | 83        |
| 3.17      | Cypress                 | Cha o 1        | Q96385   | 96  | NLNKLNMPLYIAGN   | 3324.0523  | 1618      | 5002      | 96        | 11533     | 16167     | 7505      | 525       | 4965      |
| 3.18      | Cypress                 | Cha o 1        | Q96385   | 211 | NHFFNHHKVMLLGHS  | 3324.0521  | 334       | 235       | 24        | 760       | 1461      | 599       | 3308      | 895       |
| 3.21      | Cypress                 | Cup a 1        | Q9SCG9   | 66  | KALWIIFSQNMNIKL  | 3324.0604  | 6935      | 1199      | 1602      | 1734      | 12055     | 2370      | 29        | 23870     |
| 3.21      | Cypress                 | Cup a 1        | Q9SCG9   | 71  | IFSQNMNIKLQMPLY  | 3324.0607  | 692       | 819       | 7136      | 4187      | 1207      | 748       | 3578      | 13550     |
| 3.23      | Cypress                 | Cup a 1        | Q9SCG9   | 316 | EDTNIYNSNEAFKVE  | 3324.0606  | 8235      | 7270      | 39613     | 13781     | 18705     | 14225     | 155       | 25475     |
| 3.24      | Cypress                 | Cup s 1        | Q9M4S2   | 86  | EKALWIIFSQNMNIKL | 3324.0615  | 676       | 1062      | 1170      | 1538      | 4707      | 1147      | 3563      | 9177      |
| 3.24      | Cypress                 | Cup s 1        | Q9M4S2   | 91  | IIFSQNMNIKLKMPL  | 3324.0618  | 806       | 304       | 50000     | 1594      | 75        | 179       | 6245      | 35360     |
| 3.24      | Cypress                 | Cup s 1        | Q9M4S2   | 96  | NMNIKLKMPLYVAGH  | 3324.0624  | 2364      | 18        | 7024      | 2078      | 991       | 3307      | 6585      | 25735     |
| 3.26      | Cypress                 | Cup s 1        | Q9M4S2   | 211 | NHFFNHHKVMLLGHD  | 3324.0616  | 104       | 92        | 6026      | 561       | 3137      | 633       | 2140      | 10277     |
| 3.40      | White oak               | Que a 1        | B6RQS2   | 11  | ASVIPPARLFKAFVL  | 3324.1587  | 114       | 328       | 328       | 1062      | 917       | 1062      | 341       | 3333      |
| 3.40      | White oak               | Que a 1        | B6RQS2   | 16  | PARLFKAFVLDSNDL  | 3324.1585  | 17        | 36        | 30        | 52        | 92        | 80        | 2136      | 274       |
| 3.40      | White oak               | Que a 1        | B6RQS2   | 21  | KAFVLDSNDLIPKVV  | 3324.1588  | 141       | 171       | 2489      | 111       | 97        | 242       | 4441      | 3488      |

**Supplemental Table 4. HLA class II binding patterns of prevalently re**

| Region ID | Organism            | Source protein | Acc. no. | Pos | Sequence         | Peptide ID | DPB1*0101 | DPB1*0201 | DPB1*0301 | DPB1*0401 | DPB1*0402 | DPB1*0501 | DPB1*1401 | DPB1*2001 |
|-----------|---------------------|----------------|----------|-----|------------------|------------|-----------|-----------|-----------|-----------|-----------|-----------|-----------|-----------|
| 3.41      | White oak           | Que a 1        | B6RQS2   | 141 | ASEVFKAVEAYLVAH  | 3324.1584  | 21        | 46        | 133       | 51        | 73        | 31        | 40        | 1305      |
| 4.06      | Orchard grass       | Dac g 1        | Q7XAX7   | 181 | PNYLALLVKYVDGDG  | 3324.0655  | 1656      | 279       | 50000     | 5690      | 666       | 500       | 7748      | 12339     |
| 4.07      | Orchard grass       | Dac g 2        | Q41183   | 11  | GSDEKNLALSISKYK  | 3324.0657  | 557       | 672       | 3068      | 2847      | 641       | 144       | 8095      | 6268      |
| 4.07      | Orchard grass       | Dac g 2        | Q41183   | 16  | NLALSIKYNKEGDSM  | 3324.0658  | 1351      | 2426      | 18010     | 3779      | 799       | 717       | 31957     | 21638     |
| 4.09      | Orchard grass       | Dac g 4        | P82946   | 1   | DIYNYMEPYVSKVDP  | 3324.0663  | 50000     | 50000     | 50000     | 23361     | 9581      | 1437      | 4557      | 50000     |
| 4.13      | Rye grass           | Lol p 1        | P14946   | 176 | KASNPNYLAILVKYV  | 3324.1135  | 114       | 103       | 2899      | 383       | 569       | 65        | 1052      | 13026     |
| 4.14      | Rye grass           | Lol p 11       | Q7M1X5   | 111 | RYANPIAFFRKEPLK  | 3324.1138  | 205       | 110       | 764       | 2058      | 849       | 0.25      | 1171      | 223       |
| 4.14      | Rye grass           | Lol p 11       | Q7M1X5   | 116 | IAFFRKEPLKECGGI  | 3337.0029  | 158       | 80        | 1407      | 53        | 786       | 51        | 18120     | 8.1       |
| 4.15      | Rye grass           | Lol p 2        | P14947   | 51  | DGVWEIKSDKPLKGP  | 3324.1139  | 18555     | 50000     | 1266      | 5209      | 50000     | 50000     | 1295      | 7941      |
| 4.15      | Rye grass           | Lol p 2        | P14947   | 56  | IKSDKPLKGFNFRF   | 3324.1140  | 469       | 9542      | 483       | 12300     | 19660     | 12418     | 560       | 5375      |
| 4.16      | Rye grass           | Lol p 2        | P14947   | 76  | MRNVFDDVVPADFVKV | 3337.0030  | 4060      | 1987      | 685       | 2929      | 50000     | 2212      | 24225     | 82        |
| 4.17      | Rye grass           | Lol p 3        | P14948   | 11  | SDAKTLVLNLIKRYTP | 3324.1142  | 1420      | 5439      | 11767     | 7261      | 11975     | 19        | 21639     | 23992     |
| 4.18      | Rye grass           | Lol p 3        | P14948   | 51  | LWEVKSARKPLTGPMN | 3337.0031  | 12984     | 7712      | 6241      | 2618      | 26311     | 5538      | 18603     | 671       |
| 4.19      | Rye grass           | Lol p 3        | P14948   | 76  | NVFDEVIPTAFTVVK  | 3324.1141  | 6266      | 3859      | 5633      | 4342      | 30123     | 9031      | 16711     | 13196     |
| 4.25      | Rye grass           | Lol p 5 1      | Q40237   | 71  | LIEKINAGFKA AVAA | 3324.1175  | 3337      | 251       | 339       | 18310     | 41527     | 258       | 2418      | 4991      |
| 4.29      | Rye grass           | Lol p 5 1      | Q40237   | 151 | DAYVATLREALRVIA  | 3324.1167  | 7236      | 707       | 78        | 515       | 41        | 76        | 4399      | 597       |
| 4.29      | Rye grass           | Lol p 5 1      | Q40237   | 156 | TLTEALRVIAGTLEV  | 3324.1185  | 121       | 3168      | 469       | 1615      | 1561      | 777       | 4125      | 4699      |
| 4.32      | Rye grass           | Lol p 5 1      | Q40237   | 236 | DSYKFIPTLVA AVKQ | 3324.1165  | 79        | 69        | 2.5       | 86        | 34        | 6.9       | 4652      | 12        |
| 4.36      | Rye grass           | Lol p 5 1      | Q40237   | 306 | PAAAYATATPAAATA  | 3324.1184  | 5959      | 3491      | 81        | 21724     | 36457     | 12422     | 299       | 611       |
| 4.37      | Rye grass           | Lol p 5 2      | Q40240   | 181 | AFKIAATAANAAPT   | 3324.1197  | 2717      | 5456      | 0.78      | 8768      | 10255     | 44        | 0.70      | 2.1       |
| 4.40      | Canary grass        | Pha a 1        | Q41260   | 186 | PNYLALLVKYVDGDG  | 3324.1428  | 4818      | 119       | 8498      | 1760      | 1404      | 388       | 34437     | 50000     |
| 4.43      | Canary grass        | Pha a 5        | P56164   | 121 | DAFIAALTEALRVIA  | 3324.1432  | 7.9       | 7.4       | 275       | 8.0       | 3.0       | 20        | 29689     | 31        |
| 4.43      | Canary grass        | Pha a 5        | P56164   | 126 | ALTEALRVIAGAFEV  | 3324.1437  | 872       | 5184      | 387       | 849       | 3350      | 4358      | 9.6       | 1139      |
| 4.44      | Canary grass        | Pha a 5        | P56164   | 166 | AAFKIAATAANSAPA  | 3324.1441  | 675       | 181       | 0.84      | 3480      | 8061      | 103       | 1201      | 1.4       |
| 4.45      | Canary grass        | Pha a 5        | P56164   | 181 | NDKFTVFEGAFNKAI  | 3324.1442  | 613       | 28        | 22        | 177       | 4312      | 141       | 444       | 97        |
| 4.46      | Canary grass        | Pha a 5        | P56164   | 201 | GAYETYKFIPSL EAA | 3324.1433  | 51        | 113       | 15        | 76        | 92        | 306       | 7.2       | 1266      |
| 4.46      | Canary grass        | Pha a 5        | P56164   | 206 | YKFIPSL EAAVKQAY | 3324.1436  | 5958      | 272       | 38        | 1259      | 6874      | 22        | 285       | 1655      |
| 4.79      | Kentucky blue grass | Poa p 1        | Q9ZP03   | 121 | EPIAAYHFDLSGKAF  | 3324.1556  | 2125      | 68        | 329       | 1331      | 5002      | 435       | 183       | 1038      |
| 4.82      | Kentucky blue grass | Poa p 5        | Q9FFP0   | 51  | QKLMEDINVGFKA AV | 3324.1580  | 787       | 160       | 595       | 1078      | 2614      | 15        | 69        | 2183      |
| 4.82      | Kentucky blue grass | Poa p 5        | Q9FFP0   | 56  | DINVGFKA AVAAAAG | 3324.1571  | 5339      | 1467      | 67        | 20678     | 50000     | 436       | 2.6       | 295       |
| 4.82      | Kentucky blue grass | Poa p 5        | Q9FFP0   | 61  | FKA AVAAAAGAPPAD | 3324.1575  | 24797     | 9228      | 39        | 28919     | 25866     | 2027      | 37        | 2935      |
| 4.83      | Kentucky blue grass | Poa p 5        | Q9FFP0   | 121 | ATPEAKFDSFVA AFT | 3324.1570  | 3256      | 2266      | 882       | 4846      | 20193     | 7.4       | 2772      | 3237      |
| 4.84      | Kentucky blue grass | Poa p 5        | Q9FFP0   | 131 | VAAFTALRRIAGVL   | 3324.1576  | 1518      | 1560      | 945       | 982       | 995       | 800       | 12        | 5142      |
| 4.85      | Kentucky blue grass | Poa p 5        | Q9FFP0   | 176 | AFKVAATAANAAPAN  | 3324.1578  | 675       | 1386      | 6.8       | 854       | 1593      | 297       | 297       | 13        |
| 4.86      | Kentucky blue grass | Poa p 5        | Q9FFP0   | 206 | ESTGGAYDTYKSIPS  | 3324.1583  | 566       | 941       | 3829      | 370       | 8774      | 1112      | 75        | 4830      |
| 4.86      | Kentucky blue grass | Poa p 5        | Q9FFP0   | 211 | AYDTYKSIPSL EAAV | 3324.1579  | 67        | 894       | 21        | 803       | 1132      | 496       | 485       | 352       |
| 4.87      | Kentucky blue grass | Poa p 5        | Q9FFP0   | 221 | LEAAVKQAYAAATIAA | 3324.1564  | 3569      | 1147      | 7.6       | 1071      | 5202      | 891       | 2003      | 84        |
| 5.09      | Russian thistle     | Sal k 1 1      | Q17ST3   | 191 | EGTVDFIFGEARSLY  | 3324.1590  | 922       | 495       | 451       | 2043      | 2663      | 1311      | 1918      | 558       |
| 5.11      | Russian thistle     | Sal k 1 1      | Q17ST3   | 321 | FITSLEYIEAAKWLLP | 3324.1589  | 56        | 1782      | 438       | 568       | 1338      | 275       | 229       | 4884      |
